# Supplementary material for: Co-expression of long non-coding RNAs and autism risk genes in the developing human brain
Source: BMC Syst Biol. 2018 Dec 14;12(Suppl 7):91. doi: 10.1186/s12918-018-0639-x (PMC6293492; doi:10.1186/s12918-018-0639-x)
Supplement: Supplementary file 1 — List of lncRNAs with their module assignment and association with ASD risk genes in the co-expression network. (CSV 261 kb) [file 12918_2018_639_MOESM1_ESM.csv]

Gene_ID	Gene_Name	Gene_TSS	Gene_TTS	Gene_Chromosome	Gene_Type	Module	Connectivity	Normalized	kDiff	normalized
ENSG00000227230	RP11-261C10.5	243135898	243140588	1	antisense	1	26.61813107	1	244.7464473	0.848192422
ENSG00000242540	AC010729.1	5696220	5708095	2	3prime_overlapping_ncrna	1	26.49225047	0.995270532	245.2553748	0.848559285
ENSG00000221857	CTD-2527I21.4	35138824	35151336	19	processed_transcript	1	24.11688006	0.906025339	191.4588399	0.8097798
ENSG00000236200	KDM4A-AS1	43699765	43708138	1	antisense	1	23.99655899	0.901504748	244.3850017	0.847931872
ENSG00000231025	RP11-175O19.4	96992450	96995959	10	antisense	1	23.19348609	0.871332445	189.5133037	0.808377351
ENSG00000232085	RP11-261C10.4	243164638	243169445	1	antisense	1	22.16576942	0.832720036	141.7023518	0.773912601
ENSG00000226455	RP3-512E2.2	89950116	89953186	6	antisense	1	21.24786727	0.798233476	177.7470796	0.799895613
ENSG00000259080	RP11-158I13.2	27583046	27635174	2	processed_transcript	1	21.0389286	0.790383428	246.2688295	0.849289838
ENSG00000246528	RP11-159H10.3	69834111	69854971	8	antisense	1	20.51185975	0.77058089	237.2586752	0.842794826
ENSG00000235872	RP11-335O4.3	67658991	67670919	12	antisense	1	20.23109225	0.760032157	165.5164898	0.791079135
ENSG00000227253	RP11-166N17.1	32266289	32269474	10	antisense	1	19.79069446	0.743485943	234.0882404	0.840509403
ENSG00000198221	MLLT4-AS1	167823876	167826709	6	lincRNA	1	19.59459866	0.736118415	130.3484186	0.765728065
ENSG00000235426	RP11-342M3.5	79382328	79409274	10	antisense	2	19.22377579	0.722186206	-516.3800138	0.299530834
ENSG00000231721	LINC-PINT	130941760	131110176	7	antisense	1	18.87612288	0.709124516	109.9684736	0.751037086
ENSG00000237949	LINC00844	58999626	59001543	10	lincRNA	1	18.85453308	0.708313364	115.8702348	0.755291398
ENSG00000253352	TUG1	30970677	30979395	22	antisense	6	18.61149185	0.699182047	-493.9862532	0.315673482
ENSG00000227279	AC015933.2	27954519	27963687	18	antisense	1	18.37259275	0.690206353	251.9938936	0.853416778
ENSG00000245937	LINC01184	127940426	128083172	5	lincRNA	1	18.36962483	0.690094845	136.0664281	0.769849919
ENSG00000233718	MYCNOS	15921037	15942249	2	antisense	1	17.99498519	0.676019236	148.1523095	0.778562084
ENSG00000254662	RP11-872D17.4	57325603	57327958	11	antisense	1	17.98690543	0.67571567	241.5347191	0.845877233
ENSG00000239415	AP001469.9	46251549	46254133	21	antisense	1	17.97375547	0.675221612	132.7233763	0.767440065
ENSG00000247033	RP11-252E2.1	75108601	75110712	16	antisense	1	17.91258913	0.672923528	111.8704409	0.752408128
ENSG00000227487	NCAM1-AS1	113269532	113273901	11	antisense	6	17.76531553	0.667390302	-418.6784561	0.369959461
ENSG00000235837	AC073333.8	16695871	16719898	7	antisense	1	17.62738951	0.662208275	183.413629	0.803980372
ENSG00000236546	RP1-118J21.5	39897745	39899098	1	antisense	1	17.56583678	0.659895673	269.259171	0.865862534
ENSG00000245573	BDNF-AS	27506838	27698174	11	antisense	10	17.47991998	0.656667688	-560.5572559	0.267685462
ENSG00000233723	LINC01122	58427799	59063766	2	lincRNA	1	17.45818248	0.655850987	150.9075309	0.780548198
ENSG00000232295	RP11-154D6.1	71221457	71328228	6	processed_transcript	1	16.71936992	0.628093013	79.92190285	0.729377874
ENSG00000255410	RP11-732A19.6	6630603	6635208	11	antisense	1	16.71603081	0.627967559	71.29892483	0.72316196
ENSG00000249430	CTD-2231H16.1	92151	139863	5	lincRNA	1	16.60640709	0.623848879	136.2701355	0.769996763
ENSG00000117242	PINK1-AS	20642657	20652193	1	antisense	1	16.21263022	0.609054263	115.3371647	0.754907132
ENSG00000254898	RP11-513D5.2	38335981	38337551	8	antisense	6	16.20905492	0.608919935	-413.6681572	0.373571159
ENSG00000228204	RP4-724E13.2	50866747	51022990	7	antisense	1	16.20491889	0.60876454	48.99281475	0.707082496
ENSG00000235499	AC073046.25	73985132	73986343	2	lincRNA	1	16.16149741	0.607133149	125.9753774	0.762575738
ENSG00000214719	AC005562.1	30576464	30672789	17	processed_transcript	1	15.97277281	0.600042565	233.9089762	0.84038018
ENSG00000234149	RP11-77G23.2	75003055	75025174	10	antisense	1	15.97135321	0.599989229	87.8401139	0.735085754
ENSG00000255817	RP11-196H14.4	64108763	64120489	12	antisense	1	15.8446686	0.595229554	137.4294138	0.770832434
ENSG00000258672	RP11-543C4.3	99691445	99693648	14	lincRNA	3	15.62413371	0.586943823	-333.7141798	0.431206359
ENSG00000258297	RP11-658F2.8	66666036	66668374	11	antisense	1	15.5105207	0.582675262	197.0741161	0.813827598
ENSG00000223774	RP11-307B6.3	201893842	201899978	1	antisense	2	15.46729315	0.581051157	-415.5846374	0.372189655
ENSG00000259319	RP11-293M10.6	75423683	75427741	14	antisense	3	15.28775232	0.574305617	-302.7150796	0.453552207
ENSG00000227218	RP11-203J24.8	127934503	127940952	9	antisense	2	15.28179051	0.574081625	-464.6292319	0.336835629
ENSG00000259248	USP3-AS1	63544247	63601589	15	antisense	1	15.26482869	0.573444351	192.8111708	0.810754634
ENSG00000232229	LINC00865	89829510	89840861	10	lincRNA	1	15.22455247	0.571931131	188.9871733	0.807998087
ENSG00000236754	AC004019.13	17580157	17589192	22	antisense	2	15.03065035	0.564646022	-243.5053732	0.496233802
ENSG00000255886	RP11-196H14.2	64038562	64097618	12	antisense	1	14.88939918	0.559339065	125.5930545	0.762300139
ENSG00000235033	RP11-61I13.3	39881804	39900071	6	antisense	10	14.84075545	0.557511469	-494.3966434	0.31537765
ENSG00000231871	IPO9-AS1	201688259	201829559	1	antisense	1	14.70801762	0.552524367	99.92087807	0.74379423
ENSG00000253982	CTD-2336O2.1	1761990	1764502	8	antisense	2	14.70007471	0.552225944	-278.7044344	0.470860393
ENSG00000235522	AC009505.2	105846534	105857177	2	antisense	1	14.67254589	0.551191657	90.82963515	0.737240764
ENSG00000235954	TTC28-AS1	27919376	28008581	22	processed_transcript	8	14.62901827	0.549556278	-401.2861303	0.382496801
ENSG00000242687	AC004893.11	99013165	99048240	7	antisense	6	14.48403687	0.544109172	-152.6391834	0.561735122
ENSG00000257379	RP11-793H13.8	53441741	53467528	12	processed_transcript	1	14.42856372	0.542024987	232.3381606	0.83924785
ENSG00000228343	RP11-1148L6.5	48579774	48581157	X	antisense	1	14.41052261	0.541347163	157.1911118	0.785077747
ENSG00000245748	RP11-367J11.2	7030554	7046231	4	antisense	1	14.38848766	0.540519287	121.8813269	0.759624522
ENSG00000253851	RP11-318M2.3	103228425	103229314	8	antisense	1	14.25171882	0.535380736	53.4815007	0.710318186
ENSG00000236772	RP5-1184F4.5	32449755	32453607	20	antisense	8	14.08346282	0.529059179	-312.662477	0.446381578
ENSG00000228060	RP11-69E11.8	39565160	39573203	1	antisense	1	14.03734707	0.527326561	178.7843325	0.800643321
ENSG00000225284	AC018693.6	38861720	38863133	2	antisense	1	14.02866085	0.527000211	182.9455533	0.803642957
ENSG00000257086	RP11-783K16.13	64246939	64249494	11	lincRNA	1	14.01394557	0.526447342	62.31415299	0.716685245
ENSG00000203886	CYP17A1-AS1	102832721	102834516	10	antisense	1	13.92747061	0.523198386	118.2621291	0.757015607
ENSG00000258034	RP11-493P1.2	115961187	115962733	12	antisense	6	13.92467862	0.523093488	-198.8736396	0.528406797
ENSG00000227278	RP11-656D10.5	40514461	40515057	1	antisense	1	13.88948317	0.521771157	114.5348953	0.754328813
ENSG00000204261	PSMB8-AS1	32844086	32846495	6	lincRNA	2	13.80002564	0.518410143	-224.8691373	0.50966782
ENSG00000258891	RP5-1021I20.5	73896164	73938114	14	antisense	1	13.76590309	0.517128122	184.7335082	0.804931813
ENSG00000249835	VCAN-AS1	83531352	83581320	5	antisense	1	13.70516877	0.514846269	59.40391946	0.714587389
ENSG00000236810	TCEB3-AS1	23760382	23778287	1	antisense	1	13.63087094	0.51205482	194.4613048	0.811944141
ENSG00000232729	AC083884.8	74688939	74729001	7	processed_transcript	6	13.58179837	0.510211112	-282.6959447	0.467983094
ENSG00000255351	RP11-567I13.1	11352426	11353307	11	antisense	12	13.47895461	0.506347162	-438.9150209	0.355371839
ENSG00000249592	RP11-440L14.1	762387	781849	4	antisense	1	13.46685246	0.505892472	82.88704316	0.73151531
ENSG00000257607	RP11-449P15.1	1055360	1059261	7	antisense	2	13.46581948	0.505853662	-221.3445691	0.512208522
ENSG00000249509	RP11-402J6.1	112515385	112546881	4	antisense	1	13.38836105	0.502943466	138.6589714	0.771718766
ENSG00000250132	RP11-359B12.2	974133	991190	12	antisense	1	13.36948343	0.502234214	112.9021632	0.75315185
ENSG00000256116	RP11-783K16.14	64229214	64234352	11	antisense	2	13.2838046	0.499015169	-346.8030092	0.421771215
ENSG00000227409	ZMYM4-AS1	35358822	35366077	1	antisense	1	13.13703419	0.493500848	200.0795084	0.815994049
ENSG00000132832	LINC01260	44656451	44696096	20	antisense	3	13.10082853	0.492140563	-292.5939903	0.460848041
ENSG00000258283	RP11-386G11.3	48995150	48996334	12	antisense	1	12.83730859	0.482239839	103.711885	0.746526995
ENSG00000248101	AC002116.8	36008638	36014235	19	processed_transcript	14	12.83393063	0.482112925	-499.8617235	0.311438121
ENSG00000227544	AC018647.3	35715034	35734887	7	lincRNA	10	12.75836729	0.47927393	-410.144495	0.376111207
ENSG00000250222	CTC-338M12.5	181191924	181194429	5	antisense	1	12.69528422	0.476903832	13.79515676	0.681710098
ENSG00000179818	PCBP1-AS1	69962263	70103220	2	processed_transcript	1	12.63277822	0.474555415	164.5434872	0.790377741
ENSG00000253722	RP11-10N23.4	93733216	93734022	8	antisense	1	12.59115656	0.472991645	210.2846339	0.823350462
ENSG00000258377	RP11-649E7.5	49620815	49623480	14	antisense	1	12.53123967	0.470740504	213.7697261	0.825862707
ENSG00000227617	CERS6-AS1	168771953	168786961	2	processed_transcript	4	12.50492878	0.469751976	-255.1173713	0.487863238
ENSG00000255629	RP11-196H14.3	64146388	64147857	12	antisense	8	12.4281843	0.466868604	-374.4833099	0.40181774
ENSG00000246859	STARD4-AS1	111512226	111739726	5	antisense	1	12.40018177	0.465816519	102.6241302	0.745742882
ENSG00000259007	RP11-463J10.3	51967003	51969800	14	antisense	1	12.3719246	0.464754867	49.31465866	0.707314498
ENSG00000255686	RP11-227B21.2	117453012	117456986	12	lincRNA	1	12.34337713	0.463682308	84.46967261	0.732656155
ENSG00000255435	RP11-770J1.3	118511911	118531094	11	antisense	6	12.31263195	0.462527179	-132.642297	0.576149971
ENSG00000163597	SNHG16	76557766	76565348	17	processed_transcript	1	12.29593789	0.461899966	134.6072409	0.768798057
ENSG00000256694	RP11-598F7.5	164664	166321	12	antisense	3	12.2485725	0.460120398	-221.363145	0.512195131
ENSG00000234377	RNF219-AS1	77919689	78617328	13	antisense	1	12.24695349	0.46005957	214.7893	0.826597672
ENSG00000231880	RP11-76I23.7	47577725	47578277	11	antisense	1	12.17695406	0.457429617	153.6245664	0.782506786
ENSG00000253200	RP11-582J16.5	22613908	22616657	8	antisense	6	12.16854416	0.457113648	-246.7190978	0.493917173
ENSG00000250602	RP11-517I3.1	126433505	126490371	5	antisense	2	12.14827459	0.456352098	-239.703034	0.498974736
ENSG00000246695	RASSF8-AS1	25939329	25959765	12	antisense	10	12.14092748	0.45607606	-404.1223341	0.38045231
ENSG00000236341	RP5-1103B4.3	56963886	56996757	1	antisense	1	12.13673963	0.455918718	110.6575411	0.751533804
ENSG00000236031	RP11-269F20.1	243545532	243548329	1	antisense	1	12.1098981	0.454910253	42.8840282	0.702678948
ENSG00000196741	LINC01560	47483571	47484823	X	lincRNA	1	12.04295729	0.452395215	199.6078899	0.815654081
ENSG00000231092	AC012513.6	216259595	216266130	2	antisense	1	12.01020273	0.451164592	17.14886657	0.684127636
ENSG00000259038	CTD-2325P2.4	68627166	68628445	14	antisense	2	11.96478763	0.449458298	-301.0852271	0.454727093
ENSG00000256806	C17orf100	6651718	6693202	17	lincRNA	1	11.9491923	0.448872365	132.5843029	0.767339813
ENSG00000228748	RP13-39P12.3	77782866	77793176	10	antisense	8	11.93095811	0.448187287	-289.1804161	0.463308732
ENSG00000236830	CBR3-AS1	36131767	36175815	21	processed_transcript	2	11.91518933	0.447594837	-300.2524907	0.455327375
ENSG00000220575	HTR5A-AS1	155067067	155071557	7	antisense	3	11.88779765	0.446565703	-91.29746682	0.605953587
ENSG00000250218	ALDH1L1-AS1	126103640	126108069	3	antisense	2	11.73204941	0.440714076	-186.6425205	0.537223656
ENSG00000246465	RP11-57A19.2	28284885	28292064	16	lincRNA	1	11.5320974	0.433201666	47.45660364	0.705975111
ENSG00000228549	RP11-108M9.3	16870945	16874092	1	lincRNA	1	11.38915248	0.427831073	107.2959537	0.749110588
ENSG00000234945	GTF3C2-AS1	27335535	27342599	2	antisense	6	11.36834471	0.427049303	-257.498016	0.486147139
ENSG00000224924	LINC00320	20742590	20803216	21	lincRNA	10	11.36154589	0.426793864	-374.7909346	0.401595988
ENSG00000227495	AC109333.10	5019214	5020093	17	antisense	10	11.35400956	0.426510716	-411.3451195	0.375245732
ENSG00000256248	RP11-123O10.4	66891876	67069162	12	lincRNA	1	11.33977733	0.425975996	100.6850315	0.744345073
ENSG00000257433	RP1-197B17.3	47706085	47742294	12	antisense	2	11.32900859	0.425571403	-316.5711235	0.443564012
ENSG00000259081	RP11-488C13.6	76774284	76781518	14	antisense	8	11.29368189	0.424244141	-293.4153396	0.460255968
ENSG00000236404	VLDLR-AS1	2422702	2643359	9	antisense	1	11.26211991	0.423058324	79.21438297	0.728867855
ENSG00000253741	CTD-2292P10.4	142702252	142726973	8	antisense	3	11.22084132	0.421507444	-239.4492773	0.499157658
ENSG00000232811	RP11-96K19.2	110943467	110952848	1	antisense	1	11.19917457	0.420693401	142.4113736	0.774423703
ENSG00000250902	SMAD1-AS1	145514615	145517118	4	antisense	1	11.19843397	0.420665576	167.0778344	0.792204637
ENSG00000255045	RP11-677M14.2	124744634	124746337	11	antisense	3	11.11909835	0.417684852	-247.292557	0.493503793
ENSG00000233144	RP11-537A6.9	73381433	73383496	10	antisense	1	11.10748353	0.417248471	-45.29100712	0.639117559
ENSG00000231533	RP1-232L24.3	79420297	79421305	6	lincRNA	3	11.03981121	0.41470595	-226.0601162	0.508809297
ENSG00000176840	MIR7-3HG	4769140	4772533	19	lincRNA	1	10.99106072	0.412874342	26.33653456	0.69075061
ENSG00000236213	AC006369.2	37600136	37646698	2	antisense	1	10.98477984	0.412638363	81.22244474	0.730315376
ENSG00000232784	AC067961.1	225399710	225400588	2	lincRNA	1	10.92489253	0.410388333	135.0464666	0.769114675
ENSG00000253576	GS1-5L10.1	91975908	91977418	8	antisense	1	10.87448629	0.408494517	44.78793176	0.704051386
ENSG00000231728	LL0XNC01-116E7.2	103917411	103919548	X	antisense	1	10.86678779	0.408205276	71.74376747	0.723482627
ENSG00000231889	TRAF3IP2-AS1	111483511	111598302	6	antisense	1	10.86373076	0.40809042	88.32446325	0.735434899
ENSG00000253618	GRPEL2-AS1	149348116	149357642	5	antisense	1	10.84807519	0.407502224	150.7220838	0.780414518
ENSG00000233009	NALCN-AS1	100708325	101059286	13	antisense	3	10.8248633	0.406630128	-89.30250285	0.607391666
ENSG00000258924	CTB-96E2.3	28357647	28381697	17	processed_transcript	1	10.7423297	0.403529253	121.6933505	0.759489019
ENSG00000257167	TMPO-AS1	98512973	98516422	12	antisense	1	10.74163542	0.403503168	187.2098156	0.806716871
ENSG00000233825	RP11-135A24.4	32346499	32347179	10	antisense	1	10.69651535	0.401807959	125.770702	0.762428197
ENSG00000223797	ENTPD3-AS1	40313802	40453329	3	antisense	1	10.6716516	0.400873802	35.19483112	0.697136154
ENSG00000203876	ADD3-AS1	109940104	110008381	10	processed_transcript	2	10.61917718	0.398902282	-246.3586521	0.494177002
ENSG00000234203	RP5-1050D4.2	4972851	4974681	17	antisense	3	10.58966723	0.397793562	-84.50596473	0.610849273
ENSG00000253711	RP11-787D18.1	61300164	61301069	8	antisense	1	10.58336643	0.397556834	19.48367611	0.685810694
ENSG00000224660	SH3BP5-AS1	15254184	15264493	3	antisense	1	10.46858562	0.393244397	5.499228923	0.67572994
ENSG00000223911	AC009480.3	147899401	147902956	2	antisense	1	10.45022581	0.392554599	120.7618416	0.758817536
ENSG00000245526	LINC00461	88507546	88691041	5	lincRNA	1	10.44417954	0.392327434	74.74722055	0.72564768
ENSG00000230084	RP4-613B23.1	42601963	42654388	3	antisense	10	10.44085991	0.392202712	-369.4765809	0.405426864
ENSG00000206417	H1FX-AS1	129315392	129326225	3	antisense	8	10.43368588	0.391933176	-416.7732696	0.371332824
ENSG00000232640	RP1-266L20.2	169725091	169725854	6	antisense	1	10.41387648	0.391188916	102.6544862	0.745764764
ENSG00000226648	PLCG1-AS1	41098329	41138003	20	antisense	1	10.41044246	0.391059896	60.39771723	0.715303773
ENSG00000245532	NEAT1	65422774	65445540	11	lincRNA	10	10.3878761	0.390212054	-397.681592	0.38509515
ENSG00000258964	RP11-618G20.1	61734138	61776260	14	processed_transcript	1	10.37599117	0.389765525	203.8143859	0.818686353
ENSG00000226367	ST7-AS2	117072072	117146480	7	antisense	1	10.19494514	0.382963433	135.5162096	0.769453292
ENSG00000225439	BOLA3-AS1	74148009	74150061	2	antisense	1	10.19287587	0.382885688	-36.28951903	0.645606324
ENSG00000248455	RP11-321E2.3	17404019	17441694	5	lincRNA	3	10.19239381	0.382867577	-295.0122831	0.459104804
ENSG00000255487	RP11-513D5.5	38275888	38276680	8	antisense	12	10.1771853	0.382296177	-267.7101631	0.478785665
ENSG00000255390	RP11-732A19.5	6621451	6622322	11	antisense	8	10.12653364	0.38039314	-230.3657311	0.505705575
ENSG00000224717	RP11-576D8.4	205455929	205469024	1	lincRNA	1	10.04292361	0.377251822	76.39090818	0.72683254
ENSG00000228830	RP4-781K5.2	234607008	234609483	1	antisense	1	10.04102783	0.377180596	74.16498688	0.725227974
ENSG00000249456	RP11-298J20.4	124917143	124942881	10	sense_overlapping	12	10.02261925	0.376488966	-189.8131218	0.534938114
ENSG00000237943	PRKCQ-AS1	6580419	6616452	10	processed_transcript	10	9.995658267	0.375476013	-309.5190402	0.44864754
ENSG00000247853	RP5-940J5.6	6578622	6584739	12	antisense	6	9.963828448	0.374280133	-228.7965282	0.506836742
ENSG00000256073	URB1-AS1	32393130	32393960	21	lincRNA	12	9.931323304	0.37305888	-315.6047349	0.444260638
ENSG00000215067	ALOX12-AS1	6876635	7012349	17	antisense	2	9.85966596	0.370366637	-218.1351126	0.514522073
ENSG00000230839	RP5-968J1.1	1804016	1817606	20	lincRNA	2	9.843973808	0.369777067	-229.5687456	0.506280085
ENSG00000234807	LINC01135	58785160	58899594	1	lincRNA	1	9.789417274	0.36772732	58.75505051	0.714119649
ENSG00000234758	AC034228.4	131944408	131968220	5	antisense	3	9.770156961	0.367003689	-265.3099465	0.480515873
ENSG00000254433	RP11-677I18.3	106085990	106101975	11	antisense	4	9.711710257	0.364807784	-118.0501517	0.586668788
ENSG00000235875	ARHGEF7-AS2	111113812	111115678	13	antisense	1	9.679212288	0.363586801	37.06163091	0.698481846
ENSG00000186019	AC084219.4	44105463	44113145	19	antisense	6	9.675834999	0.363459913	-211.8751905	0.519034568
ENSG00000245105	A2M-AS1	9065177	9068060	12	antisense	2	9.648376326	0.362428261	-199.1170135	0.52823136
ENSG00000186594	MIR22HG	1711493	1717174	17	lincRNA	1	9.620245326	0.361371349	26.81199185	0.691093345
ENSG00000232995	RGS5	163244505	163321894	1	antisense	10	9.599420538	0.36058894	-321.5441712	0.439979167
ENSG00000251141	RP11-53O19.1	44744900	44808777	5	antisense	7	9.592268674	0.360320237	-275.1747175	0.473404806
ENSG00000224883	CTA-250D10.19	41981304	41982217	22	antisense	6	9.583016377	0.359972618	-276.2230409	0.472649117
ENSG00000205106	DKFZp779M0652	45771432	45772358	11	lincRNA	2	9.552983229	0.358844241	-202.3112554	0.525928775
ENSG00000204650	CRHR1-IT1	45620328	45655156	17	processed_transcript	1	9.540988929	0.358393602	98.25906236	0.742596302
ENSG00000228274	RP3-508I15.9	38667585	38681820	22	antisense	1	9.521740656	0.357670424	47.8270457	0.706242146
ENSG00000255389	C6orf3	111599875	111602295	6	antisense	1	9.511989157	0.35730405	78.1273377	0.728084254
ENSG00000255248	RP11-166D19.1	122028355	122116323	11	sense_overlapping	1	9.470408961	0.355741838	109.7638547	0.750889586
ENSG00000258461	RP11-164J13.1	42348103	42412317	15	processed_transcript	10	9.464780948	0.355530387	-299.0528934	0.456192111
ENSG00000247828	TMEM161B-AS1	88268895	88436685	5	antisense	1	9.378766827	0.352298745	47.33482039	0.705887323
ENSG00000247081	BAALC-AS1	103156990	103298772	8	antisense	2	9.356092922	0.351446863	-155.3836927	0.559756729
ENSG00000177699	RP11-16K12.1	78978889	78985926	15	antisense	3	9.335736765	0.35068206	-65.07885022	0.6248534
ENSG00000229729	RP11-159G9.5	88059274	88138973	3	lincRNA	1	9.264866098	0.348019374	102.7423037	0.745828068
ENSG00000257069	RP11-783K16.10	64291722	64304769	11	processed_transcript	14	9.239004856	0.347047739	-381.8101167	0.396536177
ENSG00000236283	AC013463.2	164912312	165208261	2	antisense	1	9.13962989	0.343314116	39.16667701	0.699999278
ENSG00000244137	RP11-99J16__A.2	230710698	230795492	1	antisense	2	9.136062524	0.343180087	-130.9693853	0.577355898
ENSG00000224795	NTM-AS1	131662131	131663583	11	lincRNA	10	9.129746982	0.342942805	-285.6261795	0.465870821
ENSG00000249362	CTD-2316B1.1	87662042	87679147	5	lincRNA	1	9.116432001	0.342442547	111.9293394	0.752450585
ENSG00000228417	RP11-549L6.3	110207850	110208591	10	antisense	1	9.085212196	0.341269586	98.99957344	0.743130103
ENSG00000250846	EPHA5-AS1	65669961	65698029	4	lincRNA	1	9.000483484	0.338086238	28.07377141	0.692002905
ENSG00000255020	AF131216.5	11345748	11347502	8	antisense	10	8.992327178	0.337779797	-321.9214964	0.439707171
ENSG00000226308	RP4-813D12.3	57266797	57282998	20	lincRNA	2	8.991560979	0.33775101	-183.9606282	0.539156911
ENSG00000253948	RP11-410L14.2	98996763	99013044	8	lincRNA	6	8.98588915	0.337537913	-272.0121147	0.475684583
ENSG00000239665	RP11-295P9.3	13631143	13668445	10	processed_transcript	1	8.978877332	0.337274472	38.40020635	0.699446764
ENSG00000235989	MORC2-AS1	30922308	30932449	22	antisense	8	8.892622822	0.334033798	-222.6455431	0.511270708
ENSG00000145063	AC062028.1	11105317	11132821	2	lincRNA	3	8.884935116	0.333744963	-119.7799979	0.58542182
ENSG00000240401	AC012358.8	55282350	55346049	2	antisense	1	8.856595926	0.332680229	73.64625806	0.724854046
ENSG00000232959	RP11-332H17.1	170024077	170024683	1	antisense	4	8.845559634	0.332265584	-148.9355761	0.564404885
ENSG00000256940	RP11-783K16.5	64245964	64248217	11	antisense	1	8.845475466	0.332262422	26.07626183	0.690562991
ENSG00000184068	RP5-821D11.7	41831215	41834665	22	antisense	1	8.817967324	0.331228911	10.18034209	0.679104342
ENSG00000235512	TAB3-AS2	30854321	30854707	X	antisense	12	8.793896108	0.33032453	-182.6005671	0.540137318
ENSG00000248469	RP11-826N14.2	176049678	176062021	5	antisense	3	8.772677017	0.329527306	-208.2607221	0.521640074
ENSG00000230729	RP11-296L22.8	34521527	34524241	9	antisense	12	8.746139293	0.328530256	-244.4584893	0.495546744
ENSG00000224875	AC083949.1	42143238	42170301	2	antisense	1	8.724716074	0.327725363	116.809091	0.755968177
ENSG00000253875	RP11-16P20.3	27733338	27756426	8	antisense	1	8.714610166	0.327345673	58.22138785	0.713734956
ENSG00000237080	EHMT2-AS1	31883761	31884204	6	antisense	8	8.65951656	0.325275748	-218.8918593	0.513976569
ENSG00000225578	NCBP2-AS1	196939877	196942534	3	antisense	1	8.646922626	0.32480258	133.9918499	0.76835445
ENSG00000227533	SLC2A1-AS1	42959049	42983358	1	lincRNA	2	8.625352614	0.323992172	-207.059598	0.52250591
ENSG00000257027	RP11-705C15.3	9658567	9662085	12	sense_intronic	1	8.60553273	0.323247518	112.5786747	0.752918662
ENSG00000248540	RP11-247C2.2	74125915	74129278	15	lincRNA	1	8.603934798	0.323187482	60.28478151	0.715222363
ENSG00000237737	DCTN1-AS1	74385486	74393882	2	antisense	3	8.577302172	0.322186866	-75.23622813	0.617531406
ENSG00000231312	AC007246.3	39436637	39665343	2	antisense	3	8.544664611	0.320960638	-162.4669153	0.554650755
ENSG00000258610	RP11-488C13.7	76778952	76782249	14	lincRNA	8	8.495208759	0.319102529	-193.5734662	0.532227452
ENSG00000175061	LRRC75A-AS1	16438822	16478678	17	processed_transcript	5	8.454584988	0.317576251	-140.1675146	0.570725383
ENSG00000251450	RASGRF2-AS1	80947697	80960907	5	antisense	3	8.422980941	0.316388853	-182.4547181	0.540242454
ENSG00000255126	CTD-2531D15.5	62391516	62393372	11	antisense	2	8.370671688	0.314423539	-172.7906832	0.547208819
ENSG00000227757	AP000282.2	32913649	33071104	21	antisense	2	8.359571607	0.314006497	-186.6868638	0.537191691
ENSG00000249772	CTD-2193P3.2	81113385	81114852	5	antisense	3	8.314343003	0.31230721	-48.65634664	0.636691639
ENSG00000248049	UBA6-AS1	67701280	68080952	4	antisense	1	8.301525118	0.311825628	96.55940293	0.741371094
ENSG00000257530	RP11-843B15.2	32104117	32107528	12	antisense	1	8.298998525	0.311730702	66.76216757	0.719891617
ENSG00000229750	AC096649.2	175167904	175168522	2	antisense	1	8.296287102	0.311628831	63.44341074	0.717499276
ENSG00000242861	RP11-285F7.2	225840883	225846522	1	antisense	10	8.286646245	0.311266613	-290.0898566	0.462653158
ENSG00000259357	RP11-316M1.12	150965245	150966256	1	antisense	2	8.282934249	0.31112715	-213.9875752	0.517511845
ENSG00000228487	RP13-225O21.2	127213783	127221907	9	antisense	6	8.256158354	0.310121151	-194.9217857	0.531255509
ENSG00000258777	HIF1A-AS1	61681041	61695823	14	lincRNA	1	8.243007048	0.309627042	129.7846078	0.76532164
ENSG00000165511	C10orf25	44997698	45000888	10	antisense	1	8.204905757	0.308195536	132.8135682	0.76750508
ENSG00000255422	AP002954.4	118704607	118750263	11	antisense	1	8.202055609	0.308088453	135.0692139	0.769131073
ENSG00000242759	LINC00882	106836811	107240641	3	lincRNA	3	8.194593827	0.307808106	-199.8225805	0.527722748
ENSG00000230432	AC114803.3	219299002	219304130	2	antisense	3	8.101728152	0.304319044	-2.019169527	0.670310267
ENSG00000205664	RP11-706O15.1	3817528	3843857	X	lincRNA	1	8.057952513	0.302674346	52.64368122	0.70971424
ENSG00000236064	RP6-191P20.4	107894597	107935980	X	antisense	3	8.051721932	0.302440257	-90.84317837	0.606281063
ENSG00000228919	AC097381.1	7939001	7940296	4	lincRNA	1	7.951164585	0.29866221	73.89652612	0.725034453
ENSG00000230223	ATXN8OS	70107213	70139429	13	antisense	1	7.948456137	0.298560451	46.83075756	0.705523967
ENSG00000233452	STXBP5-AS1	146841901	147204614	6	antisense	3	7.942422765	0.298333771	-57.39765978	0.630390422
ENSG00000228677	TTC3-AS1	37187666	37193926	21	antisense	1	7.928008207	0.297792201	66.55549429	0.719742636
ENSG00000203472	RP11-77K12.4	75475896	75495407	16	antisense	10	7.879440086	0.295967445	-256.6389523	0.4867664
ENSG00000246477	AF131216.6	11315859	11325429	8	antisense	12	7.877131257	0.2958807	-179.756697	0.542187335
ENSG00000233033	CASK-AS1	41520036	41522336	X	antisense	1	7.870027954	0.295613821	120.1476856	0.758374819
ENSG00000180769	WDFY3-AS2	84965682	85011277	4	processed_transcript	2	7.793632157	0.292743549	-92.30514044	0.6052272
ENSG00000247317	RP11-273G15.2	142981738	143018437	8	lincRNA	3	7.78587377	0.292452059	-91.78891249	0.605599326
ENSG00000258430	RP11-982M15.2	104769349	104770271	14	antisense	8	7.783609745	0.292366997	-222.3943472	0.511451784
ENSG00000230319	AL022476.2	43038585	43052366	22	antisense	1	7.768153381	0.291786285	29.21403717	0.692824871
ENSG00000257434	RP11-81K13.1	75020969	75044793	12	antisense	3	7.727976479	0.290276796	-42.87742714	0.6408574
ENSG00000196810	CTBP1-AS2	1249300	1288291	4	antisense	8	7.70470201	0.289402349	-147.9130918	0.565141947
ENSG00000246022	ALDH1L1-AS2	126180065	126210169	3	antisense	2	7.70253287	0.289320852	-55.42308457	0.631813804
ENSG00000223546	LINC00630	102769161	102885406	X	lincRNA	4	7.697960723	0.289149072	-165.1443829	0.55272069
ENSG00000258168	RP11-588H23.3	70468080	70543040	12	antisense	2	7.691846361	0.288919349	-191.4793634	0.533736996
ENSG00000254665	RP11-152H18.3	8693357	8696607	11	antisense	2	7.684554403	0.288645382	-89.14329738	0.60750643
ENSG00000226605	AC007098.1	62826064	62858438	2	antisense	12	7.629747754	0.286586238	-114.404117	0.589297049
ENSG00000186960	LINC01551	28772704	28813453	14	lincRNA	1	7.615522241	0.28605177	76.36796109	0.726815999
ENSG00000255276	RRM1-AS1	4137116	4138257	11	antisense	1	7.60659647	0.28571642	179.0559579	0.800839124
ENSG00000231187	RP11-38L15.3	46582782	46598145	10	antisense	3	7.580155012	0.284722986	-106.4457547	0.595033872
ENSG00000238186	RP11-656D10.6	40515754	40517174	1	antisense	1	7.505853536	0.281931401	96.66093009	0.741444281
ENSG00000256577	RP11-283I3.2	203642	205094	12	antisense	10	7.425304606	0.278905092	-288.5226411	0.463782893
ENSG00000225610	AC007679.3	205989585	206000858	2	antisense	6	7.415534042	0.278538001	-141.2664689	0.569933197
ENSG00000213468	FIRRE	131702650	131830643	X	lincRNA	12	7.393649331	0.277715769	-204.594635	0.52428279
ENSG00000249550	LINC01234	113679459	113773683	12	lincRNA	3	7.36195448	0.27652496	-50.73781544	0.635191202
ENSG00000237476	XXbac-B135H6.15	20957092	20964679	22	lincRNA	1	7.35825869	0.276386105	81.89489913	0.730800118
ENSG00000216863	LY86-AS1	6346465	6622771	6	antisense	2	7.358214818	0.276384457	-243.9933991	0.495882006
ENSG00000257386	RP11-56G10.2	74538145	74538633	12	antisense	12	7.295209994	0.274017299	-206.6332322	0.522813258
ENSG00000228203	RNF144A-AS1	6912277	6918709	2	processed_transcript	3	7.28993918	0.273819268	-82.53035167	0.612273403
ENSG00000255864	RP11-444D3.1	24213256	24562590	12	lincRNA	1	7.239035657	0.271906769	77.27379549	0.727468974
ENSG00000228436	RP5-864K19.4	38860000	38919396	1	antisense	10	7.232415246	0.271658033	-257.4510535	0.486180993
ENSG00000259367	RP11-815J21.4	85619623	85670948	15	antisense	1	7.228658984	0.271516906	21.23828608	0.687075513
ENSG00000231121	RP1-34H18.1	77324641	77572275	12	lincRNA	1	7.219834802	0.271185372	-24.61407461	0.654022623
ENSG00000254497	CTD-2560E9.5	45253884	45254649	11	antisense	18	7.205099604	0.270631755	-227.0206763	0.508116873
ENSG00000258800	CTD-2302E22.2	63598874	63599248	14	lincRNA	1	7.201173074	0.270484231	97.20665314	0.741837668
ENSG00000234614	AL450992.2	151841877	151850385	1	antisense	3	7.198807249	0.270395345	-52.05706401	0.634240216
ENSG00000254010	RP11-103H7.5	126556896	126557433	8	antisense	1	7.186828347	0.269945285	87.28001175	0.734682002
ENSG00000257553	RP11-603J24.17	56104614	56113905	12	antisense	5	7.166554247	0.269183565	-276.5878452	0.472386146
ENSG00000226441	PLCL2-AS1	17042742	17044192	3	antisense	12	7.150447047	0.268578401	-178.5081884	0.543087328
ENSG00000243155	RP11-46A10.5	180944042	180976482	1	antisense	6	7.091287778	0.266355724	-93.10253228	0.604652397
ENSG00000225822	UBXN7-AS1	196431385	196432530	3	antisense	1	7.076480647	0.265799404	50.11848093	0.707893937
ENSG00000230699	RP11-54O7.1	911435	914948	1	lincRNA	1	7.07110945	0.265597603	12.66629533	0.680896353
ENSG00000253523	RP11-1112C15.2	58031334	58032682	8	lincRNA	1	7.047335317	0.264704383	72.67627301	0.724154828
ENSG00000228318	AP001610.5	41441056	41445708	21	antisense	1	7.037950044	0.264351769	2.907729412	0.673861845
ENSG00000215447	BX322557.10	45288052	45291738	21	processed_transcript	1	7.037365958	0.264329824	13.07896917	0.681193831
ENSG00000243069	ARHGEF26-AS1	154024401	154121332	3	processed_transcript	2	7.036934787	0.264313624	-113.8446246	0.589700362
ENSG00000225407	CTD-2384B11.2	76691439	76716215	5	antisense	1	7.022056425	0.263754628	109.79947	0.750915259
ENSG00000234160	RP11-613M10.6	37509150	37510299	9	antisense	8	7.007281757	0.263199528	-168.7070292	0.55015254
ENSG00000237126	AC073254.1	232580948	232611971	2	antisense	18	7.005222647	0.263122165	-268.2782986	0.478376122
ENSG00000246363	RP11-13A1.1	89010681	89019679	12	lincRNA	3	6.995088468	0.262741414	-69.14983396	0.621918812
ENSG00000180139	ACTA2-AS1	88932390	88940820	10	antisense	1	6.962940721	0.261533589	-5.155766535	0.668049236
ENSG00000249955	RP11-6E9.4	169981747	169993806	4	antisense	10	6.874446657	0.258208772	-208.6472011	0.521361479
ENSG00000223440	RP11-555J4.4	32633454	32648685	9	antisense	6	6.853640423	0.25742706	-90.32460585	0.606654878
ENSG00000236540	AC006547.13	20058030	20070569	22	antisense	1	6.823575105	0.256297474	53.96691297	0.710668098
ENSG00000255448	RP1-59M18.2	18000542	18022931	11	processed_transcript	3	6.798499934	0.255355373	-91.69594014	0.605666345
ENSG00000227678	RP11-73O6.3	130133410	130146179	6	antisense	1	6.749843932	0.253527315	40.5543314	0.700999575
ENSG00000258663	RP11-123M6.2	100834432	100861026	14	antisense	11	6.74512215	0.253349913	-285.0042123	0.466319168
ENSG00000259185	RP11-56B16.4	51908902	51909642	15	antisense	1	6.743337034	0.253282844	97.64526269	0.742153842
ENSG00000257913	RP11-386G11.5	48998367	49019235	12	antisense	1	6.7376285	0.253068369	62.25311632	0.716641246
ENSG00000230212	AP000688.14	36069642	36126640	21	sense_intronic	2	6.734075728	0.252934887	-192.6573838	0.532887814
ENSG00000250328	MGC32805	122436497	122479087	5	antisense	1	6.717516517	0.25231274	74.1607726	0.725224936
ENSG00000244513	CTD-2013N24.2	69013941	69056622	3	antisense	12	6.633851061	0.24916934	-139.3869676	0.571288044
ENSG00000233175	CTD-2020K17.3	45238028	45241734	17	antisense	3	6.626321565	0.248886449	-39.24257198	0.643477602
ENSG00000228838	RP4-784A16.2	53288024	53289706	1	antisense	6	6.61509312	0.248464584	-117.1879219	0.58729033
ENSG00000203865	ATP1A1-AS1	116392247	116418622	1	processed_transcript	3	6.613665022	0.248410929	6.73084777	0.676617758
ENSG00000177337	DLGAP1-AS1	3593732	3598352	18	antisense	2	6.602040346	0.247974177	-51.34256485	0.634755266
ENSG00000232453	RP4-794H19.1	58882868	58903747	1	lincRNA	2	6.589758822	0.247512748	-134.2152906	0.575016072
ENSG00000227045	RP11-98D18.1	151701026	151708386	1	antisense	1	6.556412932	0.246259907	34.98224216	0.696982909
ENSG00000259201	RP11-56B16.5	51887560	51901123	15	antisense	1	6.551301284	0.246067857	101.7354067	0.745102241
ENSG00000177410	ZFAS1	49278178	49295738	20	antisense	5	6.5425806	0.245740212	-31.93425211	0.648745839
ENSG00000234527	PCDH9-AS1	66303871	66323561	13	antisense	3	6.530336586	0.245280191	-109.0067905	0.593187737
ENSG00000225383	SFTA1P	10784437	10794980	10	lincRNA	2	6.525920297	0.245114266	-129.4616406	0.578442763
ENSG00000230286	AC013472.4	26950308	27009807	2	antisense	8	6.525479717	0.245097713	-178.4815228	0.54310655
ENSG00000233847	AC104113.3	60917490	60919573	5	antisense	1	6.523830524	0.245035751	128.9347537	0.764709018
ENSG00000239467	AC007405.6	170771113	170778148	2	lincRNA	1	6.49572944	0.243979964	-15.59363919	0.660525047
ENSG00000237481	RP4-803J11.2	229319403	229323087	1	antisense	4	6.414957367	0.240945271	-86.06899121	0.609722558
ENSG00000216921	AC131097.4	241893985	241902551	2	lincRNA	1	6.410076707	0.240761899	25.15553925	0.689899284
ENSG00000258122	RP11-61A14.1	66841433	66853448	16	antisense	3	6.401111452	0.240425065	-164.7722876	0.552988917
ENSG00000250234	CTD-2024P10.1	34656412	34657250	5	antisense	1	6.398597858	0.240330627	51.77621888	0.709088926
ENSG00000258603	RP3-414A15.10	73616700	73633941	14	antisense	1	6.391373947	0.240059217	-1.711968743	0.670531714
ENSG00000235335	AC016723.4	167814774	167941144	2	antisense	1	6.376500286	0.239500397	26.95861038	0.691199036
ENSG00000234690	AC073283.4	47192405	47345074	2	lincRNA	1	6.361377708	0.238932226	21.45196641	0.687229546
ENSG00000206337	HCP5	31400702	31477506	6	sense_overlapping	2	6.356715171	0.23875705	-106.7151695	0.594839663
ENSG00000233123	LINC01007	101562779	101569006	7	lincRNA	1	6.356148236	0.238735749	-46.68532365	0.63811246
ENSG00000254453	NAV2-AS2	20043846	20049303	11	antisense	1	6.347229398	0.238400659	-7.980716282	0.666012858
ENSG00000237720	AC011995.1	2834264	2838391	2	lincRNA	1	6.346403542	0.238369631	-74.98690124	0.617711135
ENSG00000254208	RP11-219B4.3	85177522	85178150	8	antisense	1	6.345454288	0.238333966	120.6051622	0.758704593
ENSG00000177406	RP11-218M22.1	630891	663706	12	antisense	2	6.328998559	0.237715707	-199.231452	0.528148866
ENSG00000253645	CTD-2544N14.3	38970360	38973011	8	antisense	10	6.328786558	0.237707742	-197.4819652	0.529409992
ENSG00000235635	AC016644.1	56941307	56947152	5	antisense	1	6.285830703	0.236093845	111.8593655	0.752400144
ENSG00000227407	AC008746.3	54430654	54434698	19	antisense	2	6.252713384	0.234849592	-36.45755443	0.645485195
ENSG00000239930	AP001625.4	42496539	42497443	21	sense_intronic	1	6.248225951	0.234680994	47.45478486	0.7059738
ENSG00000258232	RP11-161H23.5	49265156	49273306	12	antisense	5	6.246831457	0.234628602	-204.8924196	0.524068131
ENSG00000233427	RP1-212P9.3	28870483	28877336	1	antisense	3	6.236736795	0.234249334	-100.3451649	0.599431511
ENSG00000237517	DGCR5	18970514	19031242	22	antisense	3	6.228010003	0.23392146	-88.04329372	0.608299373
ENSG00000259218	LINC00928	89505277	89524034	15	lincRNA	1	6.226103366	0.233849825	25.05381272	0.689825954
ENSG00000227486	RP13-188A5.1	55908123	56015173	X	lincRNA	1	6.206216866	0.233102668	56.45912652	0.712464622
ENSG00000226403	RP11-31F19.1	547317	549531	9	sense_intronic	2	6.191933543	0.232566029	-135.6003574	0.57401764
ENSG00000228439	TSTD3	99520693	99531918	6	antisense	1	6.190684364	0.232519096	15.53121377	0.682961543
ENSG00000249306	LINC01411	174336295	174532457	5	lincRNA	10	6.189944544	0.2324913	-199.5653953	0.527908141
ENSG00000225420	AC104134.2	88538720	88575610	2	antisense	12	6.165540688	0.231574421	-163.4532171	0.553939775
ENSG00000233661	SPIN4-AS1	63349646	63352178	X	antisense	1	6.164787475	0.231546122	125.3714777	0.762140414
ENSG00000225595	LINC01623	28859625	28864630	6	lincRNA	1	6.140160951	0.230620877	66.46750852	0.719679211
ENSG00000251621	AC009487.5	161424015	161428774	2	3prime_overlapping_ncrna	2	6.131724435	0.230303908	-87.5284564	0.608670496
ENSG00000244558	KCNK15-AS1	44694892	44746021	20	antisense	3	6.124673714	0.230039005	-98.0401958	0.601093059
ENSG00000255717	SNHG1	62851988	62855914	11	processed_transcript	1	6.115056227	0.229677666	8.021063801	0.677547816
ENSG00000224328	MDC1-AS1	30703067	30713184	6	antisense	6	6.101232601	0.229158298	-44.80233567	0.639469821
ENSG00000225194	LINC00092	96019732	96027965	9	lincRNA	2	6.091175777	0.228780452	-101.5505111	0.598562631
ENSG00000251095	RP11-115D19.1	89551356	89726752	4	antisense	3	6.064792068	0.227789188	-26.51785806	0.652650272
ENSG00000241728	AP001062.8	44328944	44330221	21	sense_overlapping	1	6.051907927	0.227305117	55.96139512	0.71210583
ENSG00000257272	RP11-317N8.3	35873857	35875303	14	lincRNA	1	6.039380306	0.226834441	21.17990009	0.687033425
ENSG00000228452	RP5-994D16.9	42775813	42776790	1	antisense	1	6.035819615	0.226700662	59.71102807	0.71480877
ENSG00000245317	CTC-241N9.1	179859013	179861283	5	lincRNA	1	6.033745096	0.22662272	56.94087287	0.712811891
ENSG00000224076	AC009487.4	161422659	161423577	2	antisense	2	6.032312669	0.226568903	-95.21765059	0.603127704
ENSG00000218416	PP14571	240449315	240456714	2	processed_transcript	1	6.028893687	0.226440448	6.537741417	0.676478556
ENSG00000229891	LINC01315	42364400	42369236	22	lincRNA	5	6.006952165	0.225616081	-124.3992767	0.582091991
ENSG00000234661	CHL1-AS1	363370	385795	3	antisense	1	6.006412232	0.225595796	-29.67819419	0.650372129
ENSG00000250166	RP11-268P4.5	22601425	22618867	12	lincRNA	2	5.996590958	0.2252268	-45.47296783	0.638986392
ENSG00000224914	LINC00863	87342736	87357882	10	lincRNA	1	5.99291006	0.225088505	43.36477486	0.703025497
ENSG00000256469	RP11-856F16.2	94874052	94925521	11	antisense	1	5.974100921	0.224381825	50.99781486	0.708527809
ENSG00000242808	SOX2-OT	180989770	181836880	3	sense_overlapping	1	5.962312724	0.22393893	-15.98980012	0.660239472
ENSG00000249825	CTD-2201I18.1	80052374	80083654	5	antisense	2	5.908297713	0.221909529	-141.0340894	0.570100708
ENSG00000245970	KB-1208A12.3	98041726	98044121	8	antisense	5	5.897931886	0.221520074	-13.4571322	0.662065158
ENSG00000234892	Z82214.2	43232141	43239010	22	antisense	1	5.889307089	0.221196031	16.33442275	0.68354054
ENSG00000234478	RP11-275I14.4	226148003	226155071	1	antisense	12	5.873710254	0.220610041	-139.9454723	0.570885443
ENSG00000232220	AC008440.5	53874626	53876049	19	antisense	3	5.858156445	0.220025668	-118.2778297	0.586504665
ENSG00000259370	RP11-1069G10.1	62827675	62884034	15	antisense	3	5.854278741	0.219879978	-44.08192656	0.639989131
ENSG00000238018	AC093110.3	54661011	54680045	2	antisense	10	5.852093633	0.219797882	-187.0701548	0.536915394
ENSG00000245146	LINC01024	140072857	140108630	5	antisense	10	5.834930112	0.21915303	-201.1561593	0.526761432
ENSG00000242539	AC007620.3	179396961	179399191	3	antisense	1	5.82697105	0.218853999	50.86354973	0.708431024
ENSG00000235531	MSC-AS1	71828167	72118393	8	antisense	3	5.814158274	0.21837261	-75.60681266	0.617264268
ENSG00000253549	CA3-AS1	85441851	85464915	8	antisense	2	5.812478123	0.218309485	-101.1339615	0.598862903
ENSG00000232354	VIPR1-AS1	42506465	42533258	3	antisense	3	5.777521806	0.216996139	-45.78908533	0.638758517
ENSG00000229589	ACVR2B-AS1	38451027	38454820	3	antisense	1	5.760053682	0.216339843	59.26218019	0.714485216
ENSG00000235381	RP11-477D19.2	155253139	155256724	6	antisense	18	5.718793093	0.214789639	-162.3927812	0.554704195
ENSG00000256007	ARAP1-AS1	72685075	72693808	11	antisense	4	5.704657534	0.214258551	-96.13805403	0.602464227
ENSG00000236939	BAALC-AS2	103132963	103141475	8	antisense	1	5.698094115	0.214011956	17.13881324	0.684120389
ENSG00000256481	RP11-21A7A.4	64081690	64087175	11	antisense	1	5.692060623	0.213785271	58.08518328	0.713636772
ENSG00000247271	ZBED5-AS1	10858259	10906802	11	antisense	2	5.673063384	0.213071525	-67.53473685	0.623083062
ENSG00000226083	SLC39A12-AS1	18001786	18010562	10	antisense	2	5.661863324	0.212650727	-44.36175491	0.639787415
ENSG00000247903	RP11-421F16.3	26971586	26979582	12	antisense	2	5.656426065	0.212446443	-139.5156734	0.571195266
ENSG00000258441	LINC00641	21200079	21206900	14	processed_transcript	7	5.622628323	0.211176626	-66.18220752	0.624058039
ENSG00000236753	MKLN1-AS	131309744	131328222	7	processed_transcript	2	5.614751043	0.210880668	-110.7791243	0.591910142
ENSG00000237017	AC012314.8	54119511	54125343	19	antisense	8	5.609660259	0.210689402	-160.9796516	0.555722856
ENSG00000214955	AP000318.2	34205055	34325034	21	lincRNA	8	5.583904286	0.209721723	-275.4382231	0.473214857
ENSG00000204934	ATP6V0E2-AS1	149867697	149880610	7	antisense	1	5.573618749	0.209335284	63.04135799	0.717209454
ENSG00000233393	AP000688.29	36104881	36109690	21	lincRNA	10	5.556544329	0.20869378	-164.5437038	0.553153692
ENSG00000258301	RP11-488C13.5	76781733	76786724	14	lincRNA	8	5.555173668	0.208642283	-108.9937053	0.59319717
ENSG00000248859	LINC01574	176743205	176743871	5	lincRNA	1	5.552025452	0.208524001	62.21525841	0.716613956
ENSG00000237938	RP11-288I21.1	15720312	15736896	1	antisense	1	5.526965711	0.20758248	45.14150803	0.704306263
ENSG00000249786	EAF1-AS1	15436171	15455940	3	antisense	12	5.487277582	0.206091355	-110.1427821	0.592368853
ENSG00000227091	RP5-1028L10.1	110166186	110172489	1	antisense	3	5.474356255	0.205605886	-20.39439072	0.657064402
ENSG00000254420	RP11-452H21.1	78324758	78444049	11	antisense	1	5.462287394	0.205152447	94.44375507	0.73984602
ENSG00000258738	RP11-73E17.2	34874343	34876459	14	antisense	1	5.446351792	0.204553729	39.63799301	0.700339028
ENSG00000228629	AC092295.4	36528318	36535235	19	antisense	1	5.441639632	0.204376688	58.71771325	0.714092735
ENSG00000225234	TRAPPC12-AS1	3481242	3482409	2	antisense	8	5.439916691	0.204311955	-94.15137274	0.603896335
ENSG00000234899	SOX9-AS1	72034107	72237203	17	processed_transcript	2	5.436110152	0.20416894	3.440134895	0.674245632
ENSG00000232754	RP1-85F18.6	41169190	41183144	22	antisense	6	5.434774927	0.204118774	-34.90885592	0.646601582
ENSG00000225140	RP11-809C18.3	628638	631255	10	antisense	10	5.43368447	0.204077804	-163.1092586	0.554187719
ENSG00000223947	AC016738.4	100993676	101002244	2	antisense	1	5.40652187	0.203057276	1.347826698	0.672737382
ENSG00000231999	FLJ27354	89583241	89632894	1	antisense	3	5.373567249	0.201819136	-74.85133193	0.61780886
ENSG00000224186	C5orf66	135033280	135358219	5	antisense	1	5.345067831	0.200748383	116.4262539	0.755692207
ENSG00000235978	AC018816.3	4814294	4887293	3	antisense	3	5.303174594	0.199174409	-24.79165305	0.653894615
ENSG00000248508	SRP14-AS1	40039311	40067290	15	lincRNA	2	5.243345385	0.196926562	-90.76509045	0.606337353
ENSG00000233885	YEATS2-AS1	183806457	183810783	3	antisense	6	5.231236046	0.196471602	-22.74547395	0.655369613
ENSG00000124915	DKFZP434K028	61746493	61757655	11	lincRNA	1	5.224390222	0.196214397	62.14091973	0.716560369
ENSG00000232825	RP5-896L10.1	99004276	99148852	1	antisense	1	5.223680468	0.196187731	-0.324363108	0.671531976
ENSG00000256193	LINC00507	127915372	127951552	12	lincRNA	3	5.205235032	0.195494716	-51.03950649	0.634973727
ENSG00000244239	AC007009.1	8262233	8262821	7	antisense	1	5.202204444	0.195380853	15.61985665	0.683025442
ENSG00000250377	CTC-467M3.3	88692645	88693972	5	lincRNA	1	5.17128504	0.194219179	32.49566903	0.695190451
ENSG00000230844	ZNF674-AS1	46545493	46548408	X	lincRNA	1	5.16812153	0.194100322	57.15970554	0.712969637
ENSG00000219410	RP4-761J14.8	6663260	6672069	12	antisense	6	5.164341329	0.193958296	-78.33354512	0.615298691
ENSG00000257303	RP11-977G19.11	56300142	56314808	12	antisense	1	5.153910416	0.193566395	-14.90449233	0.661021821
ENSG00000235560	AC002310.12	30534752	30537144	16	antisense	5	5.120722935	0.192319506	-142.8267979	0.568808426
ENSG00000248664	CTC-498J12.3	69113112	69136394	5	antisense	1	5.117280907	0.192190186	68.42993861	0.721093838
ENSG00000224189	HAGLR	176173195	176188958	2	antisense	10	5.100797055	0.19157087	-132.3293242	0.576375579
ENSG00000259115	CTD-2540L5.5	70593314	70641204	14	lincRNA	12	5.087597843	0.191074962	-193.9382537	0.531964493
ENSG00000228222	AC074363.1	167293171	167558333	2	lincRNA	1	5.081528649	0.190846935	42.61581404	0.702485605
ENSG00000204049	RP11-126H7.4	77866875	77869610	10	antisense	1	5.06594769	0.190261542	14.94853348	0.682541515
ENSG00000184385	UMODL1-AS1	42102134	42108534	21	sense_overlapping	3	5.064194835	0.190195686	-75.90038035	0.617052649
ENSG00000246273	SBF2-AS1	9758292	9811319	11	antisense	1	5.056478158	0.189905762	52.3220014	0.709482356
ENSG00000233621	LINC01137	37454879	37474411	1	antisense	1	5.054720443	0.189839723	40.65038159	0.701068814
ENSG00000239332	LINC01119	46816697	46859007	2	lincRNA	3	5.047632157	0.189573408	-137.6595793	0.57253324
ENSG00000225978	HAR1A	63102205	63104386	20	lincRNA	1	5.047437058	0.189566078	-1.419674737	0.670742416
ENSG00000256185	RP11-612B6.2	26335864	26336950	12	3prime_overlapping_ncrna	2	5.035823394	0.18912974	-81.9214897	0.612712304
ENSG00000253744	AC025442.3	66144156	66144795	5	antisense	1	5.023331008	0.188660388	57.39341076	0.713138105
ENSG00000257042	RP11-993B23.3	27958517	27969813	12	antisense	3	5.017952696	0.188458319	-81.36964264	0.613110105
ENSG00000247240	UBL7-AS1	74461265	74481302	15	antisense	1	5.009492903	0.188140476	43.55475167	0.703162442
ENSG00000233532	LINC00460	106376563	106378217	13	lincRNA	1	5.005180216	0.187978444	-41.06936126	0.642160753
ENSG00000248429	RP11-597D13.9	158170752	158202877	4	antisense	3	4.988090197	0.187336353	-98.30103637	0.600905031
ENSG00000250241	RP11-9G1.3	133075311	133149116	4	lincRNA	1	4.981341457	0.187082796	-27.65202888	0.6518327
ENSG00000239718	HLTF-AS1	149086332	149102823	3	antisense	1	4.960928035	0.186315842	19.14695491	0.685567967
ENSG00000217576	RP11-248G5.8	52167709	52291557	13	processed_transcript	1	4.957861273	0.186200621	37.33803064	0.69868109
ENSG00000228509	AC006460.2	190676944	190708716	2	antisense	6	4.94028999	0.185540449	-158.9736065	0.557168923
ENSG00000241180	RP11-54O7.2	914171	914971	1	lincRNA	1	4.940154016	0.18553534	-1.00113457	0.671044122
ENSG00000228709	AP001065.15	44485577	44490288	21	lincRNA	1	4.93060786	0.185176681	20.31504265	0.686409989
ENSG00000229852	RP11-398K22.12	73263215	73301401	6	antisense	1	4.926523959	0.185023244	-22.34916651	0.655655293
ENSG00000224905	AP001347.6	14027421	14144468	21	antisense	1	4.917392605	0.18468017	37.82238812	0.699030241
ENSG00000253972	RP11-4K16.2	119215111	119246848	8	lincRNA	7	4.903388239	0.184154011	-34.03111713	0.647234304
ENSG00000248356	RP11-557J10.4	145642336	145650624	4	antisense	1	4.878061816	0.18320247	58.50614963	0.713940228
ENSG00000259163	RP11-1078H9.5	90642638	90648894	14	antisense	3	4.857886438	0.18244446	-52.07872621	0.6342246
ENSG00000239911	PRKAG2-AS1	151877042	151879223	7	antisense	3	4.855425959	0.182352017	-77.55030909	0.61586329
ENSG00000241990	PRR34-AS1	46053705	46057210	22	antisense	1	4.849829933	0.182141768	-16.71526666	0.659716516
ENSG00000259113	RP11-406H23.2	50448807	50456742	14	lincRNA	6	4.819494698	0.181002041	-99.04088724	0.600371706
ENSG00000249436	CTD-2023N9.3	57614389	57617431	5	lincRNA	3	4.802970083	0.180381194	-80.86706097	0.613472394
ENSG00000235823	OLMALINC	100373615	100383368	10	lincRNA	2	4.754255222	0.178550925	-84.05757578	0.611172496
ENSG00000236051	MYCBP2-AS1	77075514	77129717	13	antisense	22	4.735572843	0.177849008	-76.84923146	0.616368665
ENSG00000225746	SNHG23	100937401	100960199	14	lincRNA	3	4.728132703	0.177569474	-145.0048507	0.567238367
ENSG00000182310	SPACA6P	51693340	51712387	19	processed_transcript	4	4.723584257	0.177398584	-96.25543579	0.602379611
ENSG00000255114	RP11-110I1.6	119044188	119045493	11	antisense	1	4.689851501	0.176131208	-4.486173563	0.668531916
ENSG00000255692	RP1-127H14.3	119699768	119701011	12	antisense	3	4.683465198	0.175891268	-62.01661124	0.627060829
ENSG00000232993	RP11-334A14.5	53069938	53085502	1	antisense	2	4.682704515	0.175862688	-70.0755249	0.621251523
ENSG00000251143	RP11-849H4.4	72014291	72020910	11	antisense	6	4.674710484	0.175562344	-23.79838254	0.654610619
ENSG00000240207	RP11-379F4.4	158732263	158784070	3	antisense	3	4.674048266	0.175537464	-44.71257888	0.639534522
ENSG00000258056	RP11-644F5.11	55729104	55730852	12	antisense	12	4.666628068	0.175258679	-137.1540435	0.572897658
ENSG00000254092	RP11-369E15.3	20952645	20973877	8	lincRNA	3	4.655513166	0.174841081	-103.6291936	0.597064203
ENSG00000242428	C3orf67-AS1	58824437	59019093	3	antisense	3	4.65454916	0.174804862	-84.19557361	0.61107302
ENSG00000256008	RP11-728G15.1	120629611	120641591	12	antisense	3	4.615508116	0.173338048	-36.64782143	0.64534804
ENSG00000233078	RP11-5P18.5	16006160	16006671	1	antisense	2	4.612648736	0.173230618	-35.20415379	0.646388715
ENSG00000226101	AC007461.2	72072333	72093481	17	lincRNA	2	4.612566689	0.173227536	1.768361314	0.673040526
ENSG00000214922	HLA-F-AS1	29726601	29749049	6	processed_transcript	1	4.605746939	0.17297131	23.63650085	0.688804278
ENSG00000248184	RP11-231C18.1	54332892	54355954	4	lincRNA	2	4.600031521	0.172756576	-78.13138827	0.615444416
ENSG00000259053	RP11-33N16.3	89412312	89954659	14	processed_transcript	1	4.597448423	0.172659526	27.63439275	0.691686177
ENSG00000182648	LINC01006	156472196	156640654	7	lincRNA	1	4.564945508	0.171438357	44.19040673	0.703620657
ENSG00000247416	RP11-629G13.1	112959279	112963460	11	antisense	1	4.556743755	0.171130209	42.84189008	0.702648573
ENSG00000176868	RP11-334J6.7	131497479	131500191	9	antisense	8	4.552632341	0.170975738	-78.39234954	0.615256301
ENSG00000229481	CTD-2554C21.3	37829551	37832160	19	lincRNA	1	4.552258162	0.17096168	28.63684577	0.6924088
ENSG00000258197	NKX2-2-AS1	21511447	21512309	20	antisense	10	4.547061998	0.170766455	-164.6864037	0.553050826
ENSG00000255680	RP11-732A19.9	6618790	6619764	11	antisense	2	4.537327817	0.170400731	-88.85203137	0.60771639
ENSG00000248932	RP11-319G6.1	139389815	139583319	3	antisense	1	4.532154563	0.170206367	94.77617773	0.740085648
ENSG00000232560	LINC01549	17438890	17449185	21	lincRNA	10	4.520209988	0.169757596	-142.3576566	0.569146609
ENSG00000251307	RP11-506H20.1	55233934	55295201	5	antisense	1	4.5094894	0.169354812	43.58260634	0.703182522
ENSG00000257181	RP11-611O2.5	68841288	68843237	12	antisense	1	4.489793365	0.168614811	98.54179735	0.742800113
ENSG00000203684	IBA57-AS1	228164086	228165512	1	lincRNA	10	4.472962158	0.167982445	-191.6698088	0.533599712
ENSG00000245112	SMARCA5-AS1	143513472	143514635	4	antisense	1	4.43899792	0.166706372	73.87168337	0.725016545
ENSG00000256661	A2ML1-AS1	8776219	8830947	12	antisense	1	4.433946201	0.166516574	52.34618608	0.709499789
ENSG00000226009	KCNIP2-AS1	101819078	101828779	10	antisense	3	4.426457232	0.166235205	-44.47930914	0.639702676
ENSG00000233799	AC139887.4	764487	765074	4	antisense	6	4.41435385	0.165780468	-100.3583183	0.599422029
ENSG00000235481	UBE2R2-AS1	33785950	33818795	9	antisense	3	4.410370244	0.1656308	-97.01282171	0.601833646
ENSG00000230970	HHATL-AS1	42702653	42706776	3	antisense	10	4.4027744	0.165345416	-168.2893225	0.550453646
ENSG00000188206	HNRNPU-AS1	244840638	244846903	1	antisense	5	4.397283323	0.165139111	-146.5852513	0.566099127
ENSG00000234165	AC114877.3	26712307	26713364	3	lincRNA	1	4.388297124	0.16480149	39.52114032	0.700254795
ENSG00000203875	SNHG5	85660950	85678736	6	processed_transcript	5	4.382632544	0.164588665	-21.45202057	0.656302005
ENSG00000237310	GS1-124K5.4	66493706	66495474	7	lincRNA	2	4.3766309	0.164363177	-100.8657162	0.599056269
ENSG00000248079	DPH6-AS1	35546195	35859001	15	lincRNA	10	4.37545107	0.16431885	-157.8162413	0.558003215
ENSG00000246089	RP11-115C21.2	6403551	6407142	8	antisense	5	4.366621003	0.163987095	-121.2532328	0.584359832
ENSG00000254459	RP11-91P24.7	77829654	77872262	11	antisense	2	4.365237428	0.163935112	-63.68066984	0.625861285
ENSG00000249695	RP11-598F7.4	137411	149169	12	antisense	3	4.364140892	0.163893914	-16.11100525	0.660152101
ENSG00000222041	LINC00152	87455368	87606805	2	lincRNA	2	4.32564819	0.162447702	-106.9174339	0.59469386
ENSG00000226800	CACTIN-AS1	3607247	3613930	19	antisense	8	4.325619348	0.162446619	-56.21108297	0.631245771
ENSG00000226287	TMEM191A	20701114	20704606	22	processed_transcript	14	4.318884442	0.162193581	-155.5976375	0.559602506
ENSG00000233642	GPR158-AS1	25158072	25176276	10	antisense	3	4.314101554	0.162013883	-49.4059448	0.636151287
ENSG00000214548	MEG3	100779410	100861031	14	lincRNA	11	4.309601163	0.161844799	-172.1254479	0.547688357
ENSG00000255958	RP11-656E20.5	10214161	10214761	12	antisense	3	4.298667293	0.161434001	-74.09800137	0.618351902
ENSG00000254942	RP5-1160K1.8	109539906	109543837	1	antisense	3	4.279607227	0.160717894	-0.802016136	0.671187658
ENSG00000233635	AC037445.1	63193930	63339053	17	antisense	1	4.265391814	0.160183806	-29.72572911	0.650337863
ENSG00000245213	RP11-10K16.1	173131928	173169652	4	antisense	2	4.255727828	0.15982072	-65.22575591	0.624747502
ENSG00000235478	AC006946.15	17121586	17132104	22	lincRNA	1	4.250350978	0.159618706	13.34966299	0.681388962
ENSG00000255750	RP11-283G6.5	26230819	26319720	12	antisense	2	4.244483847	0.159398272	-19.24428141	0.657893464
ENSG00000255449	RP11-91P24.6	77866412	77870091	11	antisense	2	4.24068933	0.159255708	-55.67288327	0.631633735
ENSG00000238045	AC009133.12	29808636	29821252	16	antisense	10	4.240586015	0.159251826	-192.2338047	0.533193153
ENSG00000234336	JAZF1-AS1	28180322	28243917	7	antisense	3	4.230800797	0.158884185	-11.87273121	0.663207281
ENSG00000258424	RP11-471B22.2	90402523	90405235	14	antisense	7	4.230744533	0.158882071	-20.0331119	0.657324832
ENSG00000244879	GABPB1-AS1	50354959	50372202	15	antisense	8	4.192866303	0.157458946	-126.2404381	0.580764782
ENSG00000233850	AC103563.8	95025193	95026709	2	antisense	1	4.165876487	0.15644491	-5.547209686	0.667767063
ENSG00000256306	RP11-4N23.1	13526854	13547582	12	processed_transcript	12	4.16395507	0.15637272	-54.00932491	0.632832919
ENSG00000259326	RP11-102L12.2	38502853	38504981	15	antisense	3	4.16219367	0.156306542	-20.48498168	0.6569991
ENSG00000224066	RP4-622L5.7	32204769	32206814	1	antisense	8	4.161405904	0.156276945	-125.819278	0.581068377
ENSG00000228794	LINC01128	825138	859446	1	processed_transcript	6	4.158214427	0.156157038	-50.95910792	0.635031682
ENSG00000231920	NEBL-AS1	21174014	21175048	10	antisense	2	4.134253099	0.155256785	-98.43353907	0.600809515
ENSG00000236266	RP3-467L1.4	7810242	7827342	1	antisense	1	4.131729137	0.155161957	-12.61807645	0.662669995
ENSG00000238194	RP4-719C8.1	59626464	59628289	20	antisense	10	4.126091146	0.154950132	-132.6434176	0.576149164
ENSG00000247796	CTD-2366F13.1	53109842	53115126	5	antisense	1	4.1245376	0.154891764	-34.65226342	0.646786548
ENSG00000245614	DDX11-AS1	31020763	31073847	12	antisense	1	4.120101079	0.154725079	17.70204003	0.684526394
ENSG00000257277	RP11-434H14.1	143676165	143741294	2	antisense	1	4.109871572	0.154340745	11.15488134	0.679806844
ENSG00000226757	PP12613	121764585	121766814	4	antisense	8	4.10841865	0.154286158	-122.9738906	0.583119488
ENSG00000225877	AC004603.4	42821863	42826878	19	lincRNA	10	4.10654881	0.154215906	-143.4487654	0.568360078
ENSG00000228791	THRB-AS1	24494087	24681711	3	processed_transcript	2	4.106486231	0.154213554	-125.1563339	0.581546263
ENSG00000231064	RP11-263K19.4	155195004	155205495	1	antisense	2	4.101708529	0.154034051	-19.92428301	0.657403282
ENSG00000177133	LINC00982	3059615	3068437	1	antisense	2	4.094554272	0.153765258	-31.81025668	0.648835222
ENSG00000224789	AC012363.4	120174885	120216544	2	antisense	1	4.061840848	0.15253618	56.35030292	0.712386176
ENSG00000236197	AC002429.5	95154713	95214332	7	antisense	2	4.044932579	0.151900918	4.882189301	0.675285144
ENSG00000241231	RP11-275H4.1	181421058	181442486	3	lincRNA	2	4.039438743	0.151694509	-65.1796839	0.624780713
ENSG00000256971	LINC00508	127940595	127950160	12	lincRNA	3	4.033385952	0.151467099	-36.15119427	0.645706037
ENSG00000243960	RP11-552M11.4	111438638	111441364	1	sense_overlapping	1	4.02157558	0.151023371	76.76226596	0.727100235
ENSG00000228484	RP11-106M7.1	114764788	114779903	10	lincRNA	2	4.008779876	0.150542623	-105.6683855	0.595594242
ENSG00000255737	AGAP2-AS1	57726271	57728356	12	antisense	3	3.987633378	0.149748126	14.73689411	0.682388954
ENSG00000237101	RP11-365O16.6	224219613	224228043	1	antisense	5	3.978770176	0.149415126	-89.06927177	0.607559792
ENSG00000235453	TOPORS-AS1	32551144	32567005	9	antisense	2	3.97477345	0.149264965	-77.3661451	0.615996045
ENSG00000232767	RP11-498B4.5	116670103	116672739	10	antisense	3	3.962478745	0.14880304	-26.49154617	0.652669239
ENSG00000255343	RP11-299M14.2	143833270	143834063	8	3prime_overlapping_ncrna	1	3.956845769	0.148591403	13.25857838	0.681323303
ENSG00000225206	MIR137HG	97986740	98049863	1	lincRNA	1	3.956462259	0.148576994	11.57631003	0.680110632
ENSG00000243613	RP11-216N14.8	153746851	153751227	1	antisense	6	3.949624441	0.14832009	-13.39171478	0.662112314
ENSG00000236352	AC005220.3	53940160	53942508	20	antisense	10	3.947393073	0.148236255	-126.4883178	0.580586096
ENSG00000255135	RP11-111M22.3	76441338	76444656	11	lincRNA	2	3.944626072	0.148132296	-61.35466702	0.627537995
ENSG00000235024	AC097468.7	218944629	218961903	2	antisense	1	3.944487028	0.148127072	24.4482645	0.689389441
ENSG00000093100	XXbac-B461K10.4	17787652	17811497	22	processed_transcript	6	3.940193358	0.147965754	-20.43250216	0.65703693
ENSG00000231194	FARP1-AS1	98435405	98435840	13	antisense	8	3.93147913	0.147638352	-109.9461805	0.592510574
ENSG00000227906	SNAP25-AS1	10021978	10368776	20	antisense	3	3.931466504	0.147637877	-48.60763674	0.636726751
ENSG00000251279	CTC-436P18.1	61162070	61232040	5	antisense	1	3.928978011	0.147544382	57.49380535	0.713210475
ENSG00000249896	RP11-586D19.1	6200733	6238317	4	lincRNA	3	3.92693092	0.14746747	10.64317527	0.679437978
ENSG00000226890	LA16c-395F10.1	1625628	1626160	16	antisense	6	3.90777444	0.146747741	-58.99738062	0.629237256
ENSG00000231133	HAR1B	63095493	63102319	20	lincRNA	3	3.90617131	0.14668751	-46.51874923	0.638232536
ENSG00000248492	ZFAT-AS1	134598071	134600689	8	antisense	1	3.904759376	0.146634462	23.26938474	0.68853964
ENSG00000189419	SPATA41	100344457	100349655	15	lincRNA	1	3.900400416	0.146470691	6.639893697	0.676552193
ENSG00000257002	AP000438.2	62909546	62918361	11	antisense	3	3.892487576	0.146173397	14.86511333	0.682481382
ENSG00000259368	RP11-64K12.4	40368925	40369640	15	antisense	6	3.890192892	0.146087184	-45.75433478	0.638783568
ENSG00000229227	RP11-38L15.2	46597918	46612154	10	lincRNA	3	3.878995062	0.145666469	-38.20714304	0.644223996
ENSG00000250838	RP11-501C14.5	48995266	48997492	17	antisense	1	3.864372956	0.145117101	55.49158798	0.711767167
ENSG00000177112	MRVI1-AS1	10541272	10599932	11	antisense	2	3.859372869	0.144929243	-92.25029569	0.605266736
ENSG00000225951	ODF2-AS1	128468957	128473012	9	antisense	6	3.857670628	0.144865288	-74.32531848	0.61818804
ENSG00000228265	RALY-AS1	33983052	33994357	20	lincRNA	10	3.854526781	0.14474717	-127.9829841	0.579508659
ENSG00000203280	CTA-221G9.12	25102433	25112692	22	antisense	3	3.847176961	0.144471029	-57.10890797	0.63059857
ENSG00000236268	LINC01361	82973882	82986208	1	lincRNA	1	3.841042176	0.144240539	-58.32557702	0.629721528
ENSG00000236986	RP11-544A12.4	131132852	131167505	9	antisense	6	3.837524092	0.144108361	-34.08924719	0.647192401
ENSG00000236358	RP5-827C21.2	234357006	234365828	1	antisense	5	3.836914522	0.144085459	-42.57024547	0.641078833
ENSG00000231768	LINC01354	234527891	234531779	1	lincRNA	2	3.835003226	0.144013649	5.356556908	0.675627094
ENSG00000250584	LINC01511	1363582	1380067	5	lincRNA	1	3.831614599	0.143886335	-56.83515578	0.630795906
ENSG00000258604	AL161668.5	21024172	21029271	14	lincRNA	2	3.826477477	0.143693328	-75.56797276	0.617292266
ENSG00000254561	RP11-196E1.3	119608423	119659284	11	antisense	10	3.794276833	0.142483515	-140.6021631	0.570412065
ENSG00000254664	CTD-2560E9.3	45215815	45235292	11	antisense	1	3.783176978	0.142066482	-12.19174726	0.662977317
ENSG00000254485	RP11-380O24.1	9292588	9363303	3	antisense	1	3.77253554	0.141666672	71.12725693	0.723038212
ENSG00000232110	RP11-149I23.3	89283765	89292125	10	antisense	1	3.763384902	0.141322873	7.89865093	0.677459575
ENSG00000197180	CH17-340M24.3	154424380	154428479	X	lincRNA	2	3.762309096	0.141282453	-81.80012907	0.612799787
ENSG00000247925	RP3-510L9.1	11173452	11259099	6	antisense	1	3.75359318	0.140954987	25.64983613	0.6902556
ENSG00000256050	RP11-982M15.6	104681146	104684932	14	lincRNA	1	3.742081521	0.140522482	-34.90983411	0.646600877
ENSG00000251660	AC007036.5	30157531	30159534	7	sense_overlapping	8	3.699615492	0.138926988	-130.0067741	0.578049801
ENSG00000254741	RP11-661A12.7	143579636	143580670	8	antisense	5	3.687111453	0.138457198	-56.81797602	0.63080829
ENSG00000230487	PSMG3-AS1	1570073	1589626	7	lincRNA	5	3.677622917	0.138100704	-115.0796298	0.588810103
ENSG00000258903	RP11-355I22.2	62103378	62117175	14	lincRNA	12	3.667222426	0.137709946	-38.40788688	0.644079289
ENSG00000232406	RP11-234K24.3	36148726	36155760	20	antisense	10	3.649619998	0.137048604	-146.8371594	0.565917538
ENSG00000214184	GCC2-AS1	108507515	108534196	2	antisense	3	3.64918903	0.137032412	-30.30931608	0.649917182
ENSG00000254477	AP000640.10	59753015	59754975	11	antisense	1	3.642959074	0.136798346	-0.113597856	0.671683907
ENSG00000235191	NUCB1-AS1	48910930	48918891	19	antisense	1	3.636680073	0.136562437	-2.722675511	0.669803141
ENSG00000239203	AC093484.4	16427474	16428719	17	processed_transcript	3	3.636041673	0.136538452	-57.65251782	0.630206706
ENSG00000245864	CTC-467M3.1	88676218	88722831	5	antisense	18	3.628941776	0.136271701	-58.1111643	0.629876089
ENSG00000233222	RP11-216N14.9	153750983	153752176	1	antisense	6	3.627386365	0.136213263	-17.95433847	0.658823326
ENSG00000204850	CTB-158D10.3	46494508	46496502	19	antisense	3	3.612862708	0.135667594	1.527849294	0.672867152
ENSG00000153363	LINC00467	211382803	211435333	1	lincRNA	25	3.612469642	0.135652826	-131.0582273	0.577291856
ENSG00000235236	RP13-131K19.1	48979918	48983985	3	antisense	6	3.611487651	0.135615931	-54.25945754	0.63265261
ENSG00000227392	HPN-AS1	35059059	35106304	19	antisense	1	3.606876718	0.135442694	-25.19706368	0.653602373
ENSG00000245910	SNHG6	66921684	66926398	8	processed_transcript	5	3.600027375	0.135185356	9.466473511	0.678589747
ENSG00000247675	LRP4-AS1	46846412	46874396	11	antisense	2	3.579584407	0.134417292	13.6679278	0.681618385
ENSG00000225473	ATP13A4-AS1	193553213	193555088	3	antisense	2	3.577210489	0.134328102	-7.720757583	0.66620025
ENSG00000254907	RP11-484D2.2	43328748	43359296	11	antisense	12	3.558034824	0.133607652	-86.8269078	0.60917621
ENSG00000258634	RP4-773N10.4	110058340	110062555	1	antisense	6	3.557928116	0.133603643	-58.64284385	0.629492825
ENSG00000249593	CTB-46B19.2	139012647	139051203	5	antisense	2	3.54578273	0.133147327	-112.0294208	0.59100886
ENSG00000258240	RP1-46F2.3	110951683	110957812	12	lincRNA	3	3.542630664	0.133028901	-32.97378802	0.647996485
ENSG00000225177	RP11-390P2.4	138692548	138697288	6	antisense	2	3.532222352	0.13263785	-35.83600043	0.645933245
ENSG00000226266	AC009961.3	159670708	159712435	2	lincRNA	1	3.528864193	0.13251168	26.20693547	0.690657187
ENSG00000231638	AC011738.4	43508728	43522542	7	antisense	12	3.517814508	0.132096532	-66.05957733	0.624146438
ENSG00000253102	RP1-117B12.4	50396438	50397888	17	antisense	1	3.515862279	0.132023184	27.3515429	0.691482283
ENSG00000236790	LINC00299	8007771	8383621	2	lincRNA	2	3.515461879	0.132008141	-102.7336451	0.597709764
ENSG00000171889	MIR31HG	21455642	21559669	9	sense_overlapping	3	3.513911465	0.13194989	-40.48527636	0.642581793
ENSG00000236901	MIR600HG	123109494	123115477	9	sense_intronic	6	3.491886524	0.13112239	-43.12150469	0.640681455
ENSG00000178722	C5orf64	61637708	61751763	5	processed_transcript	10	3.487325094	0.130951012	-101.5160796	0.598587452
ENSG00000229334	AC046143.3	194632923	194645401	3	antisense	1	3.48726585	0.130948786	38.69525308	0.69965945
ENSG00000254894	NAV2-AS1	20119684	20120632	11	antisense	1	3.48407937	0.130829067	3.502314611	0.674290455
ENSG00000230530	LIMD1-AS1	45679043	45689134	3	antisense	9	3.479225823	0.130646714	-153.5451685	0.561082038
ENSG00000257045	RP11-486F17.1	199325310	199329362	2	antisense	1	3.466900788	0.130183649	-9.540070307	0.66488879
ENSG00000152931	PART1	60487713	60547657	5	lincRNA	3	3.464552025	0.130095403	-23.13443875	0.655089226
ENSG00000254154	RP4-798P15.3	177928788	178038007	1	processed_transcript	10	3.43061784	0.12882046	-125.7048	0.581150899
ENSG00000258982	RP11-638I2.4	100207407	100238555	14	antisense	3	3.430116514	0.128801625	-67.28467196	0.623263323
ENSG00000214353	VAC14-AS1	70755098	70773251	16	antisense	2	3.422973953	0.128533271	-45.35400881	0.639072144
ENSG00000248738	RP11-87E22.2	22877972	22888022	8	antisense	1	3.418807302	0.128376726	-62.68294042	0.626580503
ENSG00000224046	AC005076.5	87151423	87152420	7	antisense	2	3.409859086	0.128040532	-99.74804549	0.599861947
ENSG00000257548	RP11-797M17.1	107093298	107123314	12	antisense	1	3.398429589	0.127611113	47.94797493	0.706329318
ENSG00000255498	RP11-618K13.2	45905941	45906461	11	antisense	14	3.394114534	0.127448992	-156.088558	0.559248624
ENSG00000230551	CTB-89H12.4	149494314	149504670	5	processed_transcript	1	3.388967591	0.127255616	45.60974419	0.704643793
ENSG00000226659	RP11-137H2.4	80529597	80535942	10	antisense	1	3.386870506	0.127176826	-5.273549622	0.667964332
ENSG00000251260	WDFY3-AS1	84803258	84810391	4	antisense	12	3.382050642	0.126995739	-11.79985638	0.663259813
ENSG00000163364	LINC01116	176629589	176637931	2	lincRNA	3	3.376354997	0.126781747	-47.22090298	0.637726385
ENSG00000235023	AP001626.2	42648271	42651244	21	antisense	8	3.372088117	0.126621436	-77.87430816	0.615629734
ENSG00000236991	EDRF1-AS1	125725634	125752110	10	antisense	1	3.346358139	0.125654733	4.718568828	0.675167197
ENSG00000230435	AC004160.4	11406955	11414078	7	antisense	1	3.343157935	0.125534498	27.08882233	0.6912929
ENSG00000250555	CTC-467M3.2	88692651	88692859	5	antisense	1	3.339259468	0.125388029	-0.731576445	0.671238435
ENSG00000243321	RP11-167H9.3	150077494	150080117	3	lincRNA	2	3.336620577	0.125288883	-6.056827364	0.667399702
ENSG00000185904	LINC00839	42475543	42495336	10	lincRNA	1	3.330103491	0.125044029	11.63922557	0.680155985
ENSG00000204380	AC005042.4	158658337	158735002	2	antisense	1	3.329944766	0.125038066	18.92268473	0.685406301
ENSG00000220925	IGBP1-AS2	70148582	70149654	X	antisense	1	3.319350949	0.124640045	25.00242749	0.689788912
ENSG00000255916	RP13-895J2.7	132329850	132331575	12	antisense	3	3.318728678	0.124616665	-53.74492746	0.633023511
ENSG00000172965	MIR4435-2HG	111196350	111495100	2	lincRNA	1	3.315058504	0.124478773	-15.43162076	0.660641838
ENSG00000232233	RP11-573D15.2	186810880	186825521	3	lincRNA	1	3.309016982	0.124251786	37.99083404	0.699151666
ENSG00000229970	AC007128.1	8262264	8344516	7	antisense	2	3.305570784	0.124122309	-106.6500735	0.594886588
ENSG00000250668	CTD-2296D1.2	7346986	7347977	5	lincRNA	2	3.294748599	0.123715708	-61.61751441	0.62734852
ENSG00000248015	AC005329.7	1392170	1396467	19	antisense	4	3.292492845	0.123630957	-58.7852332	0.629390183
ENSG00000255340	RP11-484D2.5	43378882	43385671	11	antisense	1	3.283131084	0.123279226	13.80691296	0.681718573
ENSG00000223812	RP11-197K6.1	191557324	191590356	3	lincRNA	3	3.269722264	0.122775442	-75.15905873	0.617587034
ENSG00000259172	RP11-299G20.2	101295419	101305737	15	antisense	10	3.259159047	0.122378571	-95.60752822	0.602846659
ENSG00000257621	PSMA3-AS1	58265365	58298134	14	antisense	1	3.256761484	0.122288492	-7.511505599	0.666351091
ENSG00000255202	RP4-541C22.5	33665220	33696701	11	antisense	22	3.255571992	0.122243801	-46.91484166	0.637947011
ENSG00000255197	RP11-750H9.5	47383148	47409190	11	antisense	1	3.250823167	0.122065383	19.80980284	0.686045784
ENSG00000231585	AC034228.2	132011448	132013199	5	antisense	1	3.250499551	0.122053224	37.7714715	0.698993538
ENSG00000251224	CNOT10-AS1	32730635	32737454	3	antisense	1	3.244582596	0.121830918	60.46252464	0.71535049
ENSG00000232352	SEMA3B-AS1	50266641	50267371	3	antisense	10	3.232086588	0.12136143	-118.9566521	0.586015333
ENSG00000223442	TH2LCRR	132630589	132664272	5	antisense	12	3.225519118	0.121114683	-79.05603818	0.614777878
ENSG00000257095	RP11-364C11.2	119031039	119116961	12	antisense	2	3.213238784	0.120653298	-52.9970176	0.633562646
ENSG00000233728	RP11-109P14.9	37799720	37800879	1	antisense	1	3.205577724	0.120365463	-1.779060695	0.670483351
ENSG00000231437	RP11-88H9.2	111989770	111998842	1	lincRNA	3	3.203369088	0.120282483	-81.81352489	0.612790131
ENSG00000256813	RP11-804A23.4	60841806	60851081	11	antisense	2	3.202476556	0.120248949	-62.64622894	0.626606966
ENSG00000232748	RP11-196G11.6	31056460	31062803	16	lincRNA	8	3.193554675	0.119913745	-63.75409826	0.625808353
ENSG00000249180	CTC-506B8.1	96741079	96742698	5	antisense	10	3.189934553	0.119777733	-98.66470515	0.600642878
ENSG00000258457	RP11-298I3.4	22982698	22999078	14	antisense	8	3.189376772	0.119756776	-107.0856053	0.594572633
ENSG00000259070	LINC00639	38749339	38948273	14	lincRNA	10	3.187594584	0.119689818	-81.57730941	0.612960408
ENSG00000255136	CTD-2562J17.4	75208054	75241173	11	lincRNA	1	3.18307441	0.11951999	0.518247304	0.672139376
ENSG00000205791	LOH12CR2	12355406	12357067	12	lincRNA	2	3.172291194	0.119114853	-71.53929748	0.620196356
ENSG00000256164	CCND2-AS1	4248765	4276184	12	antisense	1	3.168369654	0.118967517	31.07603733	0.694167102
ENSG00000205037	RP11-863P13.4	88088041	88100985	16	lincRNA	1	3.156411285	0.118518228	-57.86704914	0.63005206
ENSG00000235280	MCF2L-AS1	112967484	112968824	13	antisense	8	3.153504448	0.118409015	-83.08020289	0.61187704
ENSG00000258010	RP11-210M15.1	80433795	80445152	15	antisense	1	3.147289216	0.118175502	-41.59349127	0.641782931
ENSG00000240591	RP11-247I13.11	31454251	31464204	22	antisense	12	3.146571982	0.118148555	-57.34629849	0.630427446
ENSG00000251562	MALAT1	65497762	65506516	11	lincRNA	10	3.141921753	0.117973841	-156.1215282	0.559224857
ENSG00000237742	RP11-624M8.1	125578558	125749190	6	antisense	2	3.140521543	0.117921234	-69.10430893	0.621951629
ENSG00000245293	RP11-286E11.1	107863479	107978799	4	antisense	10	3.138903442	0.11786044	-74.0640149	0.618376402
ENSG00000231858	AC067945.4	191021526	191032314	2	processed_transcript	3	3.128904668	0.117484775	-29.228194	0.650696514
ENSG00000247049	CTC-338M12.7	181224646	181230685	5	antisense	10	3.125786749	0.117367632	-127.5691717	0.579806958
ENSG00000197322	C17orf102	34574123	34579369	17	lincRNA	3	3.121729949	0.117215213	-6.92602371	0.666773138
ENSG00000253762	RP11-579E24.2	63704756	63751677	8	lincRNA	3	3.109821087	0.116767785	-14.85811486	0.661055253
ENSG00000235246	RP1-5O6.5	38231320	38232248	22	antisense	5	3.10632812	0.11663655	-101.5908169	0.598533577
ENSG00000224490	TTC21B-AS1	165933857	165949891	2	processed_transcript	12	3.103125885	0.116516239	-98.29770322	0.600907433
ENSG00000258813	RP11-109N23.4	73057925	73059415	14	antisense	6	3.093810428	0.116166247	-39.11368321	0.643570512
ENSG00000235027	AC068580.6	1760348	1762486	11	antisense	5	3.091935972	0.116095822	-126.4915888	0.580583738
ENSG00000244151	RP11-148K1.12	151074742	151076530	7	antisense	9	3.083915879	0.115794499	-91.4884392	0.605815923
ENSG00000250988	SNHG21	82750564	82757206	15	antisense	1	3.083061624	0.115762403	17.92599432	0.684687832
ENSG00000204054	LINC00963	129483451	129513683	9	processed_transcript	4	3.0818754	0.115717836	-47.39408164	0.637601548
ENSG00000224404	LL22NC03-13G6.2	34208141	34209262	22	lincRNA	1	3.079729264	0.115637203	-55.63385408	0.63166187
ENSG00000223901	AP001469.5	46220269	46225364	21	antisense	8	3.074418508	0.115437672	-77.69088461	0.615761955
ENSG00000226508	AC104655.3	105144113	105145424	2	lincRNA	5	3.074199695	0.115429451	-117.3167086	0.587197494
ENSG00000254187	CTB-78F1.1	167653228	167660481	5	antisense	1	3.071490182	0.115327652	-32.64936342	0.648230348
ENSG00000204282	TNRC6C-AS1	78107398	78111799	17	processed_transcript	10	3.060113911	0.114900233	-122.5158841	0.583449644
ENSG00000226519	LINC00390	44106378	44137236	13	lincRNA	1	3.059518737	0.114877872	-48.34957855	0.636912774
ENSG00000249898	MCPH1-AS1	6618475	6708209	8	antisense	1	3.058047671	0.114822602	38.77595273	0.699717623
ENSG00000253125	RP11-459E5.1	22690150	22798616	8	processed_transcript	3	3.049888314	0.114516047	-2.007542059	0.670318649
ENSG00000259071	RP11-247L20.4	50326526	50327909	14	lincRNA	2	3.042354021	0.114232975	-100.8200904	0.599089159
ENSG00000233138	RP1-67K17.3	142748443	142753759	6	antisense	18	3.042297144	0.114230838	-47.09305129	0.637818547
ENSG00000245067	IGFBP7-AS1	57109762	57205510	4	antisense	2	3.032998807	0.11388149	-6.405819281	0.66714813
ENSG00000229388	RP11-442N24__B.1	28643228	28648581	1	lincRNA	2	3.015024169	0.113206164	-68.56802256	0.622338213
ENSG00000233893	EZR-AS1	158818011	158820593	6	antisense	9	3.012939295	0.113127833	-97.41431253	0.60154423
ENSG00000182165	TP53TG1	87325225	87345515	7	lincRNA	2	3.008405451	0.112957491	-31.42248269	0.64911475
ENSG00000240291	RP11-499P20.2	18513115	18545651	10	antisense	5	3.006438734	0.1128836	-55.43897889	0.631802346
ENSG00000248092	NNT-AS1	43571594	43603230	5	antisense	1	3.003300554	0.112765695	26.84848498	0.691119651
ENSG00000225376	TMEM246-AS1	101468439	101481502	9	antisense	7	2.999860859	0.112636462	-6.847884145	0.666829465
ENSG00000228408	RP1-111D6.3	149217926	149244072	6	lincRNA	10	2.998520752	0.112586113	-95.93814775	0.60260833
ENSG00000254035	RP11-281O15.4	178969390	178990116	5	antisense	6	2.995416097	0.112469468	-30.7250303	0.649617512
ENSG00000182873	RP11-181G12.2	2181794	2184389	1	antisense	15	2.986255446	0.112125292	-89.41526731	0.607310379
ENSG00000234233	KCNH1-IT1	211132588	211133374	1	sense_intronic	3	2.982151773	0.111971113	-64.06442088	0.625584656
ENSG00000243762	AC006547.8	20110821	20111875	22	antisense	8	2.972345089	0.111602665	-69.24969567	0.621846826
ENSG00000241014	RP11-244H3.1	34974356	34985313	1	processed_transcript	2	2.966920919	0.111398873	-62.60707919	0.626635187
ENSG00000228058	RP11-552D4.1	230002730	230007162	1	lincRNA	1	2.955192663	0.11095823	-8.542162645	0.665608137
ENSG00000251442	LINC01094	78645903	78682699	4	lincRNA	2	2.95511815	0.110955431	-26.57992225	0.652605533
ENSG00000254746	RP11-958J22.1	45489689	45542474	11	processed_transcript	3	2.95065893	0.110787893	-7.58803098	0.666295927
ENSG00000223396	RP11-134G8.5	201518703	201530474	1	lincRNA	10	2.949519905	0.110745099	-84.22958336	0.611048504
ENSG00000176593	CTD-2368P22.1	58002061	58011232	19	processed_transcript	1	2.945012804	0.110575762	-13.01767588	0.662381942
ENSG00000225731	AP001627.1	42733594	42741758	21	antisense	2	2.939113372	0.110354114	-66.51274711	0.623819768
ENSG00000227704	RP1-266L20.4	169725504	169738992	6	antisense	1	2.925933747	0.109858942	31.54698091	0.694506584
ENSG00000256894	RP11-283G6.3	26125155	26126617	12	antisense	10	2.922709782	0.109737814	-117.4409831	0.58710791
ENSG00000258554	RP11-973D8.4	55966838	55967474	12	antisense	9	2.918975578	0.109597516	-186.2697109	0.537492398
ENSG00000241326	RP11-807G9.2	9983141	9984568	1	sense_intronic	2	2.909930101	0.109257668	-80.97600369	0.613393862
ENSG00000222020	AC062017.1	239401436	239402364	2	antisense	1	2.896356785	0.108747704	-30.52836074	0.649759282
ENSG00000224855	OPA1-AS1	193618609	193627337	3	antisense	4	2.896117593	0.108738717	-35.66780899	0.646054487
ENSG00000232442	CTD-3184A7.4	63627227	63628824	20	antisense	4	2.893855344	0.108653722	-63.91961405	0.625689041
ENSG00000230082	PRRT3-AS1	9947404	9954787	3	antisense	3	2.890375499	0.108522981	-2.788589603	0.669755627
ENSG00000224597	SVIL-AS1	29409402	29487745	10	antisense	1	2.887818273	0.108426903	35.87994497	0.697630022
ENSG00000234136	AC055764.1	197830685	197831296	3	antisense	6	2.881908277	0.108204858	-66.86590566	0.623565192
ENSG00000232504	ST3GAL5-AS1	85889280	85890980	2	lincRNA	10	2.860975497	0.107418391	-87.54727126	0.608656933
ENSG00000236299	RP11-340I6.7	63888200	63900794	7	lincRNA	1	2.847595738	0.106915699	44.89358832	0.704127549
ENSG00000215424	MCM3AP-AS1	46229217	46259390	21	antisense	1	2.829526614	0.106236823	4.772413303	0.675206011
ENSG00000255467	RP11-144G7.2	108105074	108121684	11	antisense	4	2.829101618	0.106220856	-67.6458123	0.623002993
ENSG00000225938	RP4-575N6.4	101235683	101236528	1	antisense	2	2.823745106	0.106019606	12.17636808	0.680543187
ENSG00000257151	PWAR6	25031873	25036490	15	lincRNA	7	2.822925339	0.105988806	3.141920146	0.674030663
ENSG00000244567	AC096772.6	207821290	207822769	2	lincRNA	7	2.820853409	0.105910962	-28.61376347	0.651139429
ENSG00000235257	ITGA9-AS1	37745432	37861780	3	processed_transcript	1	2.813122408	0.1056205	11.50832865	0.680061628
ENSG00000225032	RP11-228B15.4	127816066	127822520	9	antisense	2	2.802088588	0.105205947	-37.54570649	0.644700796
ENSG00000250604	RP11-597D13.8	158199105	158200442	4	antisense	3	2.792564768	0.104848127	-66.28998863	0.623980345
ENSG00000255164	RP5-1047A19.4	144992914	144994837	8	antisense	1	2.791958416	0.104825346	6.416663203	0.676391277
ENSG00000223534	HLA-DQB1-AS1	32659880	32660729	6	antisense	10	2.791165186	0.104795544	-107.8961401	0.593988355
ENSG00000247373	RP11-486O12.2	123575891	123585115	12	lincRNA	1	2.788068031	0.10467918	46.43460226	0.705238396
ENSG00000251023	RP11-549J18.1	93860669	93863825	5	sense_intronic	1	2.785187749	0.104570965	20.06537328	0.686230014
ENSG00000224805	LINC00853	47179250	47180339	1	antisense	2	2.784152276	0.104532061	-74.2144946	0.618267928
ENSG00000225465	RFPL1S	29436534	29478175	22	antisense	18	2.779627877	0.104362075	-35.08993003	0.646471054
ENSG00000258736	RP11-982M15.7	104653548	104655787	14	lincRNA	3	2.763702517	0.103763742	-14.24524848	0.661497041
ENSG00000203688	RP11-351J23.1	167679626	167683787	6	lincRNA	1	2.761660032	0.103687004	34.82965812	0.696872918
ENSG00000215196	AC091878.1	17130028	17217047	5	antisense	1	2.760854217	0.103656728	-23.05260293	0.655148218
ENSG00000230325	RP11-385F5.4	236540094	236550280	1	antisense	6	2.750248927	0.103258276	-49.78250654	0.635879841
ENSG00000175147	TMEM51-AS1	15111815	15152464	1	antisense	8	2.74742901	0.103152329	-63.0230886	0.626335305
ENSG00000226578	RP11-258F22.1	37775371	37784131	10	lincRNA	3	2.747324354	0.103148397	-66.35427423	0.623934004
ENSG00000234961	RP11-124N14.3	17233325	17234833	10	antisense	9	2.727053516	0.1023868	-109.6152062	0.592749158
ENSG00000197291	RAMP2-AS1	42753914	42761257	17	lincRNA	8	2.723128592	0.102239336	-63.9872698	0.625640271
ENSG00000224195	RP11-574K11.5	73813518	73814737	10	antisense	1	2.71944675	0.102101006	7.820238836	0.677403051
ENSG00000251187	CTC-459M5.2	112192020	112210139	5	antisense	1	2.711082817	0.101786764	18.63395531	0.685198169
ENSG00000247363	RP11-637A17.2	68674371	68687755	12	lincRNA	1	2.709087625	0.101711802	43.650004	0.703231105
ENSG00000236922	LINC01378	117406166	117691188	4	lincRNA	3	2.707702658	0.101659768	-25.86948384	0.653117656
ENSG00000240758	RP11-155G14.6	128455937	128469197	7	processed_transcript	1	2.703934812	0.101518206	-26.5903091	0.652598046
ENSG00000249042	CTD-2015H6.3	80482293	80488063	5	antisense	3	2.701228663	0.101416533	-32.15524006	0.648586539
ENSG00000259211	RP11-64K12.8	40464193	40466726	15	antisense	6	2.690480314	0.101012706	-19.74169975	0.657534898
ENSG00000234741	GAS5	173863900	173868882	1	processed_transcript	5	2.683750126	0.100759845	-11.99673342	0.663117893
ENSG00000253161	LINC01605	37421341	37554183	8	lincRNA	3	2.677950011	0.100541929	-17.93155155	0.658839752
ENSG00000230830	ARPP21-AS1	35650197	35651961	3	antisense	1	2.673895719	0.100389605	11.55149385	0.680092744
ENSG00000233021	RP11-490E15.2	437561	441170	10	antisense	1	2.663535454	0.100000359	-11.32218202	0.663604147
ENSG00000240527	RP11-429G19.3	95833508	95873758	10	sense_intronic	1	2.661934055	0.099940192	18.88356763	0.685378103
ENSG00000256427	RP11-118B22.4	9246497	9257960	12	lincRNA	2	2.660811465	0.099898016	-91.57185105	0.605755796
ENSG00000230555	RP11-517P14.2	43420738	43422100	10	lincRNA	1	2.656593253	0.099739533	-8.458396145	0.66566852
ENSG00000236963	LINC01141	20360579	20431234	1	lincRNA	3	2.649977808	0.099490984	-43.41034297	0.640473245
ENSG00000256628	ZBTB11-AS1	101676475	101679217	3	antisense	1	2.648268767	0.099426773	10.65037603	0.679443168
ENSG00000228962	HCG23	32390510	32393686	6	antisense	1	2.647628236	0.099402708	39.87869296	0.700512538
ENSG00000251022	THAP9-AS1	82893009	82900960	4	antisense	1	2.644264545	0.09927633	33.4044826	0.695845573
ENSG00000213742	ZNF337-AS1	25624045	25678074	20	antisense	6	2.640975466	0.099152756	-46.21231755	0.638453428
ENSG00000235663	SAPCD1-AS1	31764310	31765588	6	antisense	1	2.640795902	0.09914601	1.941715687	0.67316549
ENSG00000237341	SYP-AS1	49198966	49202454	X	antisense	3	2.639348157	0.099091616	-2.617049458	0.669879282
ENSG00000258655	ARHGAP5-AS1	32074946	32076793	14	antisense	2	2.637979854	0.099040208	-6.602123298	0.667006623
ENSG00000203392	CTD-2026K11.6	75678548	75680752	15	antisense	4	2.636642688	0.098989969	-49.17081283	0.636320783
ENSG00000248673	LINC01331	74369376	74536976	5	lincRNA	1	2.635969749	0.098964686	-38.26627014	0.644181374
ENSG00000230074	RP11-195F19.9	34665665	34681298	9	antisense	1	2.630290335	0.098751304	2.246264617	0.673385025
ENSG00000259327	CTD-2184D3.6	52116574	52122131	15	lincRNA	7	2.624698073	0.098541197	2.385732838	0.673485562
ENSG00000224764	RP11-54O15.3	94928551	94934946	9	antisense	10	2.618967105	0.098325878	-92.5578039	0.605045067
ENSG00000232098	CTD-2619J13.14	58404238	58408484	19	lincRNA	3	2.614782457	0.098168657	-43.56323804	0.64036303
ENSG00000237250	RP11-193H5.1	237862175	237928321	1	antisense	1	2.604027481	0.097764581	19.23803489	0.685633623
ENSG00000246731	MGC16275	74209980	74213342	17	antisense	2	2.603087211	0.097729254	-51.18413149	0.634869473
ENSG00000231104	RP11-354M20.3	118017487	118045810	10	antisense	12	2.60132083	0.097662889	-22.44360698	0.655587215
ENSG00000177640	CASC2	118046279	118210153	10	antisense	8	2.591724689	0.097302352	-73.09441055	0.619075345
ENSG00000254578	CTD-2517M22.16	144463817	144465101	8	antisense	4	2.581059343	0.096901643	-64.27732946	0.62543118
ENSG00000237797	RP11-472N13.3	31693084	31707388	10	lincRNA	2	2.580091074	0.096865265	-45.6189358	0.638881171
ENSG00000225924	RP1-111D6.2	149243299	149244001	6	antisense	10	2.578543125	0.096807107	-81.89511305	0.612731318
ENSG00000238217	AC093590.1	199608068	199659132	2	lincRNA	1	2.574430327	0.096652584	-6.145797611	0.667335568
ENSG00000231769	RP1-8B1.4	46097093	46129706	6	antisense	3	2.573719861	0.096625891	-42.16346377	0.641372064
ENSG00000226471	CTA-292E10.6	28800683	28848559	22	antisense	1	2.573031745	0.096600038	-15.31334734	0.660727096
ENSG00000250934	RP11-71E19.1	126266796	126291279	3	lincRNA	1	2.572177807	0.096567955	4.563905469	0.675055708
ENSG00000253716	MINCR	143280161	143281690	8	antisense	2	2.563571867	0.09624462	-54.54497022	0.632446797
ENSG00000239791	AC002310.7	30572250	30583860	16	antisense	15	2.561237151	0.096156903	-64.13311609	0.625535137
ENSG00000255929	RP11-867G2.8	94545330	94740355	11	antisense	1	2.553845081	0.095879175	3.884667461	0.674566076
ENSG00000235423	RP11-282O18.3	123252030	123261483	12	antisense	25	2.544362039	0.095522887	-78.18604811	0.615405014
ENSG00000258944	RP4-647C14.3	73272182	73274081	14	antisense	2	2.539623117	0.09534484	-17.32552386	0.65927661
ENSG00000248294	CTD-2023N9.2	57574027	57614341	5	lincRNA	3	2.539080792	0.095324465	-27.36374255	0.652040512
ENSG00000233058	LINC00884	194487454	194518279	3	antisense	6	2.533660402	0.095120815	-37.71557816	0.644578343
ENSG00000244332	RP11-119K6.6	94577439	94611238	10	sense_overlapping	1	2.53204369	0.095060073	13.44982366	0.681461163
ENSG00000228170	RP1-40E16.11	3138394	3153062	6	antisense	5	2.505800573	0.094074091	-58.64675981	0.629490002
ENSG00000246283	CTD-2036P10.3	42739118	42743202	15	lincRNA	7	2.498925445	0.093815786	-5.211438442	0.668009105
ENSG00000257494	RP3-521E19.2	112256800	112259091	12	antisense	6	2.492466917	0.093573132	-25.16956945	0.653622192
ENSG00000258598	RP11-260M19.1	104376530	104378951	14	lincRNA	1	2.488645498	0.093429557	-2.61065089	0.669883895
ENSG00000204620	RP11-1148L6.9	48568014	48574860	X	antisense	1	2.480900727	0.093138578	39.35906708	0.700137963
ENSG00000229190	RP11-390B4.3	17695709	17700232	10	antisense	4	2.476692128	0.092980456	-27.00635954	0.652298134
ENSG00000248890	HHIP-AS1	144642922	144661357	4	antisense	10	2.475015788	0.092917474	-59.87279264	0.628606211
ENSG00000224441	AC068831.3	90932586	90935130	15	antisense	1	2.469525301	0.092711191	22.81834068	0.688214503
ENSG00000230506	RP11-416N4.4	10173520	10196990	20	lincRNA	3	2.466461557	0.092596083	-38.22185241	0.644213393
ENSG00000254911	SCARNA9	93721513	93721865	11	antisense	1	2.457017317	0.092241253	13.96232633	0.681830603
ENSG00000223390	RP11-91A18.4	52033391	52044279	1	antisense	1	2.455115104	0.092169784	20.62926849	0.6866365
ENSG00000223478	RP11-545E17.3	128724445	128733194	9	antisense	2	2.447313919	0.091876686	-73.55994663	0.618739761
ENSG00000259372	CTD-2240J17.1	81410517	81419127	15	lincRNA	1	2.44582	0.091820558	0.256471	0.671950673
ENSG00000250910	AC097467.2	155173716	155381694	4	antisense	7	2.44474924	0.091780328	-14.37389604	0.661404304
ENSG00000197182	MIRLET7BHG	46053869	46113928	22	lincRNA	4	2.432610318	0.091324256	-14.56529357	0.661266335
ENSG00000258399	MEG8	100894770	100935999	14	lincRNA	10	2.431189547	0.091270876	-90.50398131	0.606525574
ENSG00000248138	RP11-446J8.1	16400430	16512187	4	antisense	18	2.425773039	0.091067372	-32.15070321	0.648589809
ENSG00000240553	RP1-184J9.2	23020147	23088058	1	antisense	3	2.412125304	0.090554612	-18.52276101	0.658413575
ENSG00000248256	OCIAD1-AS1	48852008	48860203	4	antisense	7	2.408740287	0.090427433	-4.99978683	0.668161675
ENSG00000259153	RP6-65G23.3	70810205	70815403	14	lincRNA	18	2.406211668	0.09033243	-59.35560378	0.628979029
ENSG00000240137	ERICH6-AS1	150703564	150720146	3	antisense	2	2.39739916	0.090001335	-38.0917844	0.644307153
ENSG00000254756	RP11-867G23.12	66334494	66339875	11	antisense	3	2.393620788	0.089859378	-44.17621203	0.639921165
ENSG00000245322	RP11-15B17.1	99950006	100195099	4	antisense	1	2.382719882	0.089449819	34.27707057	0.696474582
ENSG00000243319	FGF14-IT1	102292327	102394519	13	sense_intronic	3	2.377471684	0.089252639	-14.42054432	0.661370678
ENSG00000173811	CCDC13-AS1	42732575	42746768	3	antisense	2	2.37316982	0.089091013	-49.46223003	0.636110714
ENSG00000255348	RP11-700F16.3	134178824	134186166	11	antisense	1	2.372069809	0.089049684	25.22159905	0.689946903
ENSG00000207955	MIR219A2	128392007	128393510	9	lincRNA	1	2.368851524	0.08892877	-8.33981667	0.665753999
ENSG00000235884	LINC00941	30795681	30802711	12	lincRNA	3	2.348477225	0.088163286	-31.63607141	0.648960784
ENSG00000233360	Z83844.1	37641832	37658377	22	antisense	3	2.348271737	0.088155565	-52.21042392	0.634129665
ENSG00000224536	RP11-134G8.7	201507241	201534784	1	antisense	2	2.344756607	0.088023498	-61.86517998	0.627169989
ENSG00000256152	RP11-463O12.3	122865335	122867021	12	lincRNA	8	2.343714485	0.087984345	-70.68152381	0.620814686
ENSG00000229619	MBNL1-AS1	152262616	152269555	3	antisense	5	2.342377451	0.087934111	-62.64726963	0.626606216
ENSG00000229043	AC091729.9	1160374	1165267	7	antisense	1	2.337350127	0.087745229	3.172002002	0.674052347
ENSG00000257286	RP11-545P7.4	113185624	113192161	12	antisense	14	2.336451967	0.087711484	-92.39881142	0.605159677
ENSG00000234497	ERICH3-AS1	74577430	74626098	1	antisense	3	2.335033362	0.087658186	-7.681965348	0.666228214
ENSG00000226877	RP11-575L7.2	83829656	83837861	9	antisense	1	2.323985755	0.087243115	37.06162053	0.698481838
ENSG00000231764	DLX6-AS1	96955141	97014065	7	antisense	1	2.308269611	0.086652643	18.44510123	0.685062033
ENSG00000228703	RP5-1160K1.6	109628417	109630305	1	antisense	3	2.307834855	0.086636309	0.587399735	0.672189225
ENSG00000235865	GSN-AS1	121280768	121285530	9	antisense	10	2.30757688	0.086626616	-66.33507837	0.623947842
ENSG00000224614	TNK2-AS1	195908076	195911257	3	antisense	4	2.29406938	0.086119125	-45.77513052	0.638768577
ENSG00000236333	TRHDE-AS1	72253508	72274907	12	processed_transcript	3	2.292272485	0.086051614	-18.1579411	0.658676558
ENSG00000223414	LINC00473	165908802	165988048	6	lincRNA	3	2.291410866	0.086019242	-19.81239582	0.657483936
ENSG00000255129	RP11-839D17.3	113278437	113314437	11	antisense	1	2.288063092	0.085893463	17.57000593	0.684431216
ENSG00000254102	RP11-21C4.1	64574306	64581888	8	antisense	1	2.286321827	0.085828041	11.57065882	0.680106559
ENSG00000244300	GATA2-AS1	128489212	128502348	3	antisense	2	2.281023837	0.08562899	-5.601588766	0.667727863
ENSG00000203362	RP3-337H4.8	43588230	43591362	6	antisense	1	2.277171143	0.085484241	9.860635288	0.67887388
ENSG00000250770	RP5-1063M23.1	3296202	3300224	12	lincRNA	3	2.270620036	0.085238108	-4.232750646	0.668714597
ENSG00000255857	PXN-AS1	120201291	120213138	12	antisense	9	2.266752102	0.085092786	-34.22717228	0.647092977
ENSG00000256013	RP11-27M24.1	10529440	10532082	16	antisense	9	2.264289009	0.085000245	-63.77804821	0.625791089
ENSG00000258748	CTD-2223O18.1	104137150	104137898	14	antisense	1	2.262981713	0.084951129	15.99026794	0.683292455
ENSG00000258345	RP11-603J24.6	56118968	56119939	12	antisense	1	2.262598311	0.084936724	14.89918254	0.682505941
ENSG00000259134	LINC00924	95433095	95507847	15	lincRNA	2	2.262482842	0.084932385	-27.82783484	0.651705969
ENSG00000203650	LINC01285	118839554	118919669	X	lincRNA	10	2.261447679	0.084893493	-68.89464785	0.622102764
ENSG00000259234	ANKRD34C-AS1	79191707	79283945	15	lincRNA	7	2.261081098	0.08487972	-26.34249156	0.652776686
ENSG00000224310	LINC01567	24661422	24671062	16	lincRNA	4	2.252609977	0.084561451	-19.53447067	0.65768428
ENSG00000254027	RP11-363E6.3	81279871	81281446	8	antisense	8	2.249145396	0.084431283	-47.11702332	0.637801267
ENSG00000214194	LINC00998	113116718	113118613	7	lincRNA	25	2.247509249	0.084369812	-60.91438181	0.627855376
ENSG00000240707	LINC01168	132965534	132976354	10	lincRNA	1	2.237404137	0.083990152	-45.31433008	0.639100747
ENSG00000225057	AC096574.4	238231684	238255633	2	processed_transcript	12	2.227730186	0.083626691	-79.42877773	0.614509187
ENSG00000236723	RP5-1024G6.2	53209783	53213775	1	antisense	2	2.224327578	0.083498852	13.52773745	0.681517328
ENSG00000225721	RP11-269F19.2	44759037	44775810	1	antisense	5	2.217324379	0.083235734	-153.139545	0.561374434
ENSG00000214546	AC087491.2	39619613	39622513	17	lincRNA	1	2.211309936	0.083009765	10.59864449	0.679405878
ENSG00000223855	HRAT92	520391	525232	7	lincRNA	1	2.207617895	0.082871051	32.32288362	0.695065897
ENSG00000254854	CTD-2523D13.2	119729583	119739623	11	antisense	1	2.206860196	0.082842583	3.687729485	0.674424112
ENSG00000233706	RP5-1087E8.3	226992140	226993206	1	antisense	22	2.20413726	0.08274028	-35.48464409	0.646186522
ENSG00000203809	LINC00577	104936294	104940527	6	lincRNA	3	2.200350281	0.082597999	-48.5834508	0.636744186
ENSG00000234286	AC006026.13	23680195	23680786	7	antisense	1	2.199859367	0.082579555	19.95961355	0.686153776
ENSG00000214725	CDIPT-AS1	29863593	29868053	16	antisense	1	2.197459744	0.082489398	3.859859858	0.674548193
ENSG00000255470	RP11-113D6.6	18140186	18189495	11	lincRNA	10	2.186112474	0.082063069	-48.94180313	0.636485866
ENSG00000258449	RP11-713N11.4	25096868	25100980	12	antisense	3	2.184361957	0.081997301	-14.29817806	0.661458886
ENSG00000238120	LINC01589	45604432	45605621	22	antisense	1	2.183643652	0.081970313	-4.737428736	0.668350797
ENSG00000249109	RP11-1026M7.2	177782197	177794396	5	antisense	1	2.180054132	0.081835451	6.680775605	0.676581663
ENSG00000257702	LBX2-AS1	74502595	74504678	2	antisense	2	2.179578992	0.0818176	-1.393761535	0.670761095
ENSG00000182366	FAM87A	375931	383174	8	lincRNA	3	2.178032106	0.081759481	-12.35969561	0.66285625
ENSG00000231563	RP11-245P10.4	228407381	228409694	1	antisense	1	2.175124423	0.081650237	4.847730522	0.675260304
ENSG00000226581	RP11-340I6.8	63900823	63917994	7	lincRNA	10	2.169807564	0.081450477	-79.22242405	0.614657938
ENSG00000236304	AP001189.4	76657056	76663866	11	antisense	2	2.15562652	0.08091768	-13.63162587	0.661939373
ENSG00000248719	RP11-377G16.2	80183280	80190169	4	antisense	1	2.15309363	0.080822516	7.542946616	0.677203163
ENSG00000257467	RP11-121G22.3	81270675	81312422	12	lincRNA	12	2.149408957	0.080684079	-31.46465838	0.649084348
ENSG00000229953	RP11-284F21.7	156646507	156661424	1	antisense	2	2.147821613	0.080624441	8.91266328	0.67819053
ENSG00000255082	GRM5-AS1	88504576	88524054	11	antisense	18	2.144238194	0.080489808	-18.97430074	0.658088081
ENSG00000241111	PRICKLE2-AS1	64067964	64103131	3	antisense	18	2.13872951	0.080282841	-22.03183545	0.655884043
ENSG00000226380	AC058791.1	130876809	130913310	7	lincRNA	10	2.125165832	0.079773239	-83.95015798	0.611249929
ENSG00000256725	RP11-662M24.2	130628316	130716281	12	lincRNA	3	2.121083479	0.079619861	-10.98738768	0.663845485
ENSG00000247679	RP11-1277A3.1	177611253	177619754	5	antisense	15	2.116791303	0.079458599	-45.74513972	0.638790196
ENSG00000236850	BMS1P20	22303224	22322847	22	processed_transcript	12	2.113588011	0.079338248	-43.73705325	0.640237734
ENSG00000235387	LINC00961	35909483	35911686	9	lincRNA	2	2.107392409	0.079105473	-10.63042723	0.664102801
ENSG00000234646	RP4-753D10.3	23031542	23039236	20	sense_overlapping	1	2.105696003	0.079041737	6.761716914	0.67664001
ENSG00000203739	RP11-296O14.3	173417793	173461362	1	antisense	2	2.104907855	0.079012126	-75.86119972	0.617080892
ENSG00000236326	RP3-486I3.5	116244187	116244728	6	antisense	5	2.104467946	0.078995598	-64.94867635	0.624947236
ENSG00000258317	RP11-603J24.5	56120033	56129619	12	antisense	1	2.096210983	0.078685375	20.09381078	0.686250513
ENSG00000257829	RP11-845M18.6	52306616	52308371	12	antisense	3	2.094666632	0.078627352	-15.79114291	0.660382675
ENSG00000225670	CADM3-AS1	159194325	159207973	1	antisense	17	2.08282255	0.078182357	-27.97288677	0.651601408
ENSG00000231427	LINC01445	54330697	54349849	7	lincRNA	10	2.082590114	0.078173624	-58.96994352	0.629257034
ENSG00000226762	RP11-298E9.6	3240371	3257210	10	lincRNA	3	2.081466391	0.078131405	-25.0922917	0.653677898
ENSG00000189316	RP11-797H7.5	64888527	64890100	7	antisense	1	2.080895731	0.078109964	13.98462963	0.681846681
ENSG00000225953	SATB2-AS1	199457700	199476935	2	antisense	1	2.080532621	0.078096322	-6.408240189	0.667146385
ENSG00000254064	CTD-2530N21.4	22254576	22275162	8	antisense	6	2.075366627	0.07790223	-20.67590773	0.65686147
ENSG00000241572	PRICKLE2-AS1	64099273	64101122	3	antisense	12	2.074086107	0.07785412	-25.04990364	0.653708454
ENSG00000255108	AP006621.8	823634	832883	11	antisense	4	2.072806137	0.07780603	-41.935995	0.641536036
ENSG00000255310	AF131215.2	11107788	11109726	8	sense_intronic	6	2.061446961	0.077379254	-31.62417769	0.648969358
ENSG00000250056	LINC01018	6582136	6588499	5	lincRNA	7	2.058063462	0.077252132	-28.68742595	0.651086329
ENSG00000256448	RP11-809N8.4	73405297	73410682	11	antisense	12	2.054369003	0.077113327	-15.83400769	0.660351776
ENSG00000232682	RP11-388P9.2	60050668	60060743	10	antisense	22	2.044154546	0.076729559	-34.51678493	0.646884208
ENSG00000179859	AC025335.1	7913324	7915953	17	antisense	1	2.043738823	0.07671394	13.22367788	0.681298145
ENSG00000230733	AC092171.4	5475804	5479811	7	lincRNA	3	2.034480346	0.076366089	-3.449708784	0.669279056
ENSG00000259352	RP11-109D20.2	45073492	45074048	15	antisense	1	2.031354798	0.076248659	32.74697782	0.695371608
ENSG00000206187	RP11-1084I9.1	25902360	26053120	15	lincRNA	3	2.028451573	0.076139582	-35.47788659	0.646191394
ENSG00000254703	SENCR	128691672	128696023	11	antisense	2	2.026369587	0.076061359	-3.362616062	0.669341837
ENSG00000224509	AC010884.1	104936241	105038496	2	antisense	3	2.02625317	0.076056985	-61.40598321	0.627501003
ENSG00000196951	SCOC-AS1	140283724	140373381	4	antisense	3	2.021969549	0.075896045	-52.94477107	0.633600308
ENSG00000236869	RP11-944L7.4	44557357	44685653	3	antisense	1	2.020596968	0.075844476	6.043057704	0.676121961
ENSG00000248367	CTB-129O4.1	180293245	180295253	5	antisense	4	2.017024409	0.075710251	-40.05723713	0.642890347
ENSG00000255384	RP11-770J1.4	118433121	118435206	11	lincRNA	1	2.010267434	0.075456384	12.2574038	0.680601602
ENSG00000255517	CTD-3074O7.5	66473490	66480233	11	antisense	1	2.004212501	0.075228894	5.399298117	0.675657904
ENSG00000236714	AC005592.1	142745600	142760998	5	lincRNA	3	1.997119287	0.074962394	-23.60399987	0.654750741
ENSG00000254211	LINC01485	173786790	173809039	5	lincRNA	2	1.995136007	0.07488788	-55.21032279	0.631967174
ENSG00000205181	LINC00654	5496067	5504613	20	lincRNA	12	1.985067449	0.074509594	-53.44364017	0.633240696
ENSG00000238280	RP11-436D10.3	62793562	62805887	10	antisense	1	1.984617481	0.074492688	1.982124517	0.673194619
ENSG00000204588	LINC01123	109987063	109996140	2	lincRNA	3	1.979880913	0.07431473	-17.24994063	0.659331094
ENSG00000253877	LINC01608	110937690	111027433	8	lincRNA	10	1.976200861	0.074176467	-41.91676792	0.641549896
ENSG00000227719	AC006042.6	8114025	8116561	7	antisense	1	1.964127661	0.073722864	-16.49762546	0.659873404
ENSG00000249700	SRD5A3-AS1	55363971	55395847	4	processed_transcript	3	1.955719901	0.073406975	-17.90996476	0.658855313
ENSG00000259143	CTD-2240H23.2	95185117	95185854	14	sense_overlapping	10	1.950063263	0.073194449	-73.67028955	0.61866022
ENSG00000227115	RP11-267C16.1	51346249	51643939	18	lincRNA	10	1.939867316	0.072811377	-52.61334014	0.633839221
ENSG00000226239	RP1-310O13.7	32027753	32031575	20	antisense	2	1.939583763	0.072800724	-45.95073947	0.638641988
ENSG00000226853	AC010894.3	174487389	174488386	2	lincRNA	2	1.938664636	0.072766191	-31.70537909	0.648910823
ENSG00000258498	DIO3OS	101552221	101560431	14	lincRNA	2	1.936941517	0.072701452	-50.31384581	0.635496823
ENSG00000251632	RP11-714L20.1	137545731	137603430	4	lincRNA	2	1.935865509	0.072661025	3.20827637	0.674078496
ENSG00000215039	CD27-AS1	6439001	6451567	12	processed_transcript	1	1.929150633	0.07240874	4.151686389	0.674758558
ENSG00000232527	RP11-14N7.2	144227030	144250288	1	lincRNA	1	1.92887376	0.072398337	-3.083365114	0.669543137
ENSG00000254224	KB-1043D8.6	96235427	96238034	8	antisense	1	1.926809907	0.072320796	-12.23205944	0.662948257
ENSG00000248801	C8orf34-AS1	68303468	68331491	8	antisense	1	1.923921983	0.072212294	-3.032351948	0.66957991
ENSG00000238057	ZEB2-AS1	144518097	144521477	2	antisense	1	1.920563355	0.072086107	9.547441913	0.678648113
ENSG00000233930	KRTAP5-AS1	1571353	1599184	11	antisense	3	1.916084174	0.071917819	-2.763199811	0.669773929
ENSG00000254230	RP11-582J16.3	22565997	22567171	8	antisense	4	1.902960247	0.071424739	-35.50583125	0.646171249
ENSG00000226808	LINC00840	43859411	43895433	10	lincRNA	2	1.900646509	0.071337809	-21.53760002	0.656240315
ENSG00000243993	RP11-14D22.2	64444482	64445476	3	lincRNA	1	1.885875784	0.070782858	3.542716903	0.674319579
ENSG00000257761	RP11-186F10.2	71582293	71583852	12	antisense	3	1.88462446	0.070735844	-64.2076675	0.625481396
ENSG00000228486	LINC01125	97664217	97703064	2	antisense	4	1.877678309	0.07047487	-78.80862015	0.614956231
ENSG00000256540	RP11-598F7.6	166856	182399	12	lincRNA	4	1.855895261	0.069656457	-65.18470168	0.624777096
ENSG00000167912	RP11-25K19.1	59119040	59121346	8	antisense	1	1.850193107	0.069442221	16.81517982	0.683887096
ENSG00000246323	RP11-325L7.1	138032774	138037266	5	antisense	1	1.848879317	0.069392861	-2.057110462	0.670282917
ENSG00000232611	RP11-1114A5.4	136840931	136847797	X	lincRNA	6	1.843408654	0.069187322	-29.22754563	0.650696981
ENSG00000258504	RP11-638I2.6	100291117	100294656	14	lincRNA	15	1.842913988	0.069168737	-61.24823634	0.627614716
ENSG00000100181	TPTEP1	16601887	16698742	22	lincRNA	10	1.835742439	0.068899295	-29.27336382	0.650663953
ENSG00000249673	NOP14-AS1	2934899	2961738	4	antisense	6	1.826693884	0.068559331	-7.43649639	0.666405161
ENSG00000235118	AC010731.4	206642418	206649449	2	lincRNA	3	1.825166488	0.068501945	-40.52401365	0.642553869
ENSG00000257126	FOXG1-AS1	28729083	28765277	14	antisense	1	1.822751197	0.0684112	10.91014194	0.679630422
ENSG00000205562	RP11-497E19.1	85524432	85529988	14	lincRNA	18	1.817316693	0.06820702	-23.06319987	0.655140579
ENSG00000225173	XXbac-BPG308K3.5	28837869	28839006	6	lincRNA	1	1.816239852	0.068166562	-3.352076613	0.669349435
ENSG00000245571	AP001258.4	59130133	59143015	11	lincRNA	2	1.813143447	0.068050226	-13.81979591	0.66180373
ENSG00000243150	RP11-538P18.2	158545220	158571066	3	antisense	16	1.80878752	0.06788657	-54.89041082	0.632197784
ENSG00000224645	RP11-126K1.8	151340648	151341966	1	antisense	10	1.808649863	0.067881398	-64.00856997	0.625624916
ENSG00000249568	RP11-234O6.2	161378953	161388417	4	antisense	1	1.807484452	0.067837612	0.347483148	0.67201628
ENSG00000224407	RP5-956O18.3	230280312	230281893	1	antisense	8	1.799376992	0.067533006	-46.57933039	0.638188866
ENSG00000255478	RP11-867O8.5	65367438	65375299	11	antisense	2	1.799248981	0.067528196	-78.52376851	0.615161567
ENSG00000234263	RP3-325F22.3	136629172	136647999	6	antisense	2	1.798921781	0.067515903	-54.46184824	0.632506716
ENSG00000228237	EFCAB14-AS1	46674036	46692098	1	antisense	10	1.795262955	0.067378437	-48.44574716	0.63684345
ENSG00000225986	UBXN10-AS1	20184242	20186486	1	antisense	1	1.794976381	0.06736767	-3.564289095	0.66919646
ENSG00000197815	RP1-253P7.4	17858227	17860041	17	antisense	10	1.794080769	0.067334021	-87.84172	0.608444678
ENSG00000235070	AC068138.1	226180044	226185371	2	lincRNA	2	1.792199914	0.067263356	-41.93707291	0.641535259
ENSG00000254693	RP11-58K22.5	44604508	44605337	11	antisense	2	1.788484836	0.067123776	-7.810121678	0.666135832
ENSG00000253738	OTUD6B-AS1	91059909	91070189	8	antisense	7	1.78708881	0.067071326	-20.4986429	0.656989252
ENSG00000237714	P4HA2-AS1	132184876	132192808	5	antisense	1	1.786150114	0.067036058	4.163009984	0.67476672
ENSG00000258842	RP11-355I22.5	62069518	62081154	14	lincRNA	12	1.785916653	0.067027287	-13.87977265	0.661760495
ENSG00000242659	RP11-271C24.2	113746872	113747408	3	lincRNA	12	1.785635107	0.067016709	-22.12079654	0.655819915
ENSG00000250156	CTC-498M16.2	88408982	88439090	5	lincRNA	1	1.780792422	0.066834764	3.372827117	0.674197113
ENSG00000227053	RP11-395B7.4	101014320	101017608	7	antisense	3	1.780096677	0.066808624	-35.78360111	0.645971018
ENSG00000256654	RP11-429A20.4	5023682	5025594	12	lincRNA	1	1.779567285	0.066788734	-3.961877685	0.668909857
ENSG00000256028	RP11-197N18.2	122975320	122982907	12	processed_transcript	1	1.778316379	0.066741736	15.01835396	0.682591846
ENSG00000258136	RP11-864J10.4	107736555	107759968	12	antisense	6	1.778004382	0.066730014	-34.03011059	0.64723503
ENSG00000239407	LL0XNC01-237H1.2	102884414	102906158	X	lincRNA	12	1.77676281	0.066683367	-15.14472776	0.660848647
ENSG00000231160	KLF3-AS1	38612701	38664883	4	processed_transcript	1	1.775845958	0.06664892	-0.224196308	0.671604182
ENSG00000224223	VSTM2A-OT1	54556970	54571726	7	sense_overlapping	7	1.773822799	0.066572908	-20.35348027	0.657093893
ENSG00000231955	AC007383.4	206115547	206122323	2	antisense	5	1.77218495	0.066511372	-32.12468985	0.648608561
ENSG00000215241	RP11-266K4.9	8235415	8242564	12	lincRNA	6	1.771758567	0.066495352	-13.81080616	0.66181021
ENSG00000257057	C11orf97	94512581	94532123	11	lincRNA	3	1.769429844	0.06640786	-44.6532119	0.639577317
ENSG00000237248	LINC00987	9240003	9243052	12	lincRNA	2	1.767403639	0.066331733	-47.88449073	0.637248035
ENSG00000254236	KB-1639H6.2	103020187	103021428	8	antisense	7	1.760840228	0.066085139	-14.82755023	0.661077286
ENSG00000233875	RP11-61L14.6	154579065	154579663	1	antisense	3	1.758412392	0.065993922	-4.096446089	0.668812852
ENSG00000253607	RP11-557C18.3	123002560	123030751	8	antisense	4	1.753056641	0.065792701	-47.11670527	0.637801496
ENSG00000254721	RP11-805J14.5	70206291	70207390	11	antisense	5	1.751858947	0.065747702	-52.44287602	0.633962101
ENSG00000255366	RP11-1134I14.8	47190772	47193262	8	lincRNA	3	1.749792535	0.065670065	-11.13113663	0.663741863
ENSG00000256234	RP11-283G6.4	26211164	26335856	12	antisense	2	1.745565347	0.065511245	-6.157057019	0.667327451
ENSG00000242622	RP11-18H7.1	120094895	120136783	3	lincRNA	1	1.744616434	0.065475594	3.888541251	0.674568868
ENSG00000229180	GS1-124K5.11	66526088	66542624	7	lincRNA	11	1.738848406	0.065258883	-40.69582273	0.64243002
ENSG00000204603	LINC01257	131165011	131212931	12	lincRNA	3	1.736624389	0.065175324	-0.832830037	0.671165445
ENSG00000234111	RP11-364P22.1	157572490	157576154	4	lincRNA	3	1.734964492	0.06511296	-22.18232359	0.655775563
ENSG00000250167	CTC-321K16.1	135559577	135634874	5	antisense	2	1.727325975	0.064825973	10.87764723	0.679606998
ENSG00000229116	RP11-20J15.3	44282926	44293709	10	lincRNA	2	1.721865046	0.0646208	-57.40943094	0.630381937
ENSG00000227372	TP73-AS1	3735601	3747336	1	antisense	15	1.716041175	0.064401991	-39.9561419	0.642963222
ENSG00000256925	ADGRA1-AS1	133083073	133088491	10	antisense	3	1.714015837	0.064325897	-7.536092443	0.666333367
ENSG00000184441	AP001062.7	44331234	44335851	21	antisense	1	1.714001689	0.064325365	-11.46248367	0.66350301
ENSG00000233936	RP11-399H11.2	135245696	135252708	9	lincRNA	0	1.71380018	0.064317794	-57.42285963	0.630372257
ENSG00000257156	RP11-13A1.3	89048187	89309553	12	lincRNA	3	1.711711044	0.064239303	-18.68185424	0.658298892
ENSG00000258945	RP11-497E19.2	85528599	85529386	14	lincRNA	18	1.707395236	0.064077154	-20.62609751	0.656897375
ENSG00000251458	RP11-844P9.1	176124210	176131461	5	lincRNA	1	1.703876884	0.063944965	-18.77813243	0.65822949
ENSG00000258666	RP11-638I2.8	100333790	100354061	14	antisense	3	1.701083433	0.063840012	-25.14426786	0.653640431
ENSG00000250303	RP11-356J5.12	112270749	112362534	11	lincRNA	1	1.694418191	0.063589592	-8.84987056	0.665386324
ENSG00000249203	RP11-473L15.3	44495618	44510282	5	lincRNA	3	1.685247061	0.063245023	-38.24169049	0.644199092
ENSG00000228395	RP11-216B9.6	128528901	128552410	9	antisense	1	1.683898203	0.063194345	12.77948178	0.680977944
ENSG00000254835	RNF185-AS1	31205264	31205616	22	antisense	1	1.678506913	0.062991789	9.67246752	0.678738239
ENSG00000250320	CTD-2269F5.1	84384427	84490765	5	antisense	3	1.675400107	0.062875063	-24.00977013	0.654458239
ENSG00000224616	RTCA-AS1	100264009	100266120	1	antisense	2	1.675200795	0.062867574	-37.49879931	0.644734609
ENSG00000236662	RP11-108L7.4	100980507	100985614	10	antisense	8	1.673739131	0.062812658	-37.36761741	0.644829172
ENSG00000228358	AC113617.1	117360625	117372852	4	lincRNA	3	1.671537636	0.062729945	-5.98935276	0.667448342
ENSG00000224731	AC016716.2	80028012	80030551	2	antisense	4	1.67139363	0.062724535	-35.01712041	0.646523539
ENSG00000235703	LINC00894	149938628	150224580	X	antisense	11	1.671116131	0.062714109	-81.26913486	0.613182557
ENSG00000254429	CTD-2562J17.7	75260127	75261025	11	antisense	1	1.668682264	0.062622666	12.66701352	0.680896871
ENSG00000256092	RP13-942N8.1	123363868	123366113	12	lincRNA	18	1.666647776	0.062546228	-48.64020854	0.636703272
ENSG00000246560	RP11-10L12.4	102828055	102844075	4	antisense	2	1.666444459	0.062538589	-45.35495005	0.639071466
ENSG00000224272	AC114730.3	241808312	241812016	2	antisense	2	1.664216425	0.06245488	-50.18943901	0.635586502
ENSG00000257270	RP11-521B24.5	105467793	105470617	14	antisense	7	1.663238917	0.062418154	-31.48114718	0.649072462
ENSG00000256747	RP11-860B13.1	27779821	27781067	12	antisense	12	1.659177141	0.062265548	-25.05842314	0.653702313
ENSG00000205634	LINC00898	47621043	47631569	22	lincRNA	3	1.657930511	0.062218711	-5.38549207	0.667883638
ENSG00000248694	RP11-18D7.2	182772565	182773931	4	antisense	12	1.656696817	0.06217236	-23.5984168	0.654754765
ENSG00000223764	RP11-54O7.3	916865	921016	1	lincRNA	8	1.654793827	0.062100863	-34.46145555	0.646924093
ENSG00000254963	CTD-2562J17.9	75264289	75265170	11	antisense	22	1.650506034	0.061939766	-32.94791814	0.648015133
ENSG00000228620	RP3-434P1.6	38424288	38427336	22	antisense	3	1.648667647	0.061870696	5.04544651	0.675402829
ENSG00000231680	AP003774.6	64394342	64395831	11	lincRNA	3	1.638249607	0.061479279	-18.40697725	0.658497039
ENSG00000256512	RP11-860B13.3	27798641	27800708	12	antisense	12	1.635943576	0.061392639	-24.14069903	0.654363858
ENSG00000233912	AC026202.3	5156905	5187329	3	antisense	2	1.634284433	0.061330303	-21.5259942	0.656248681
ENSG00000228737	AC008781.7	141618414	141626481	5	antisense	1	1.633366452	0.061295813	17.22982717	0.684185997
ENSG00000244968	LIFR-AS1	38556786	38671216	5	antisense	28	1.632648044	0.061268822	-71.30137096	0.620367866
ENSG00000231074	HCG18	30287397	30327150	6	antisense	12	1.630705512	0.061195839	-21.42826531	0.656319129
ENSG00000254489	RP5-1024C24.1	30584130	30630508	11	antisense	1	1.629553941	0.061152573	-3.442986871	0.669283902
ENSG00000228835	AC012123.1	32769795	32774413	18	antisense	1	1.625787394	0.06101106	7.105169367	0.67688759
ENSG00000258210	RP11-478C19.2	110387463	110445548	12	processed_transcript	4	1.624111734	0.060948104	-38.86974766	0.643746355
ENSG00000257735	RP11-370I10.6	48350945	48442411	12	antisense	1	1.620188282	0.060800696	4.985999651	0.675359976
ENSG00000255087	RP11-168K9.2	127067002	127101320	11	lincRNA	3	1.617582679	0.0607028	-23.81435359	0.654599106
ENSG00000254452	RP11-867G23.4	66276779	66277492	11	antisense	13	1.614955087	0.060604079	-59.06191087	0.629190739
ENSG00000247121	CTD-2260A17.2	96814028	96935809	5	antisense	3	1.613058513	0.060532823	2.117078869	0.673291901
ENSG00000231691	RP11-203F10.5	204277005	204277948	1	antisense	1	1.612090082	0.060496438	-21.21097426	0.656475764
ENSG00000237655	AC073834.3	177603089	177618572	2	antisense	1	1.608626035	0.06036629	36.32588319	0.697951479
ENSG00000232310	RP11-557H15.4	134525314	134659836	6	lincRNA	10	1.605723312	0.060257231	-49.16201459	0.636327126
ENSG00000254814	RP11-535A19.1	75800877	75803415	11	antisense	3	1.60336817	0.060168746	-1.182629504	0.670913291
ENSG00000250889	LINC01336	75047719	75052843	5	lincRNA	3	1.603296144	0.06016604	-15.68033717	0.66046255
ENSG00000226137	BAIAP2-AS1	81029130	81034881	17	lincRNA	6	1.599334869	0.060017211	-16.12170704	0.660144387
ENSG00000225554	RP11-527D7.1	241424292	241433492	1	lincRNA	3	1.595264208	0.059864272	-37.09160591	0.645028136
ENSG00000231908	IDH1-AS1	208255247	208256181	2	antisense	2	1.592713999	0.059768457	-29.27405865	0.650663452
ENSG00000198468	FLVCR1-AS1	212852108	212858088	1	lincRNA	1	1.589110579	0.059633073	11.41146944	0.679991806
ENSG00000224429	LINC00539	21303515	21348721	13	lincRNA	1	1.588732306	0.059618861	11.68114028	0.6801862
ENSG00000226944	RP1-120G22.11	6204840	6205780	1	antisense	10	1.586907175	0.059550289	-69.29220332	0.621816184
ENSG00000128254	C22orf24	31933521	31945518	22	processed_transcript	2	1.583730599	0.059430942	-25.96525369	0.65304862
ENSG00000256482	RP11-625L16.3	24830421	24836558	12	antisense	1	1.58281049	0.059396372	1.333454031	0.672727021
ENSG00000254960	KIRREL3-AS2	126940746	126945090	11	antisense	1	1.582048533	0.059367745	-35.1841943	0.646403103
ENSG00000186369	LINC00643	62114353	62130962	14	lincRNA	4	1.577334021	0.059190615	-12.06200586	0.663070841
ENSG00000248479	RP11-807H7.2	65702202	65705553	4	lincRNA	1	1.57225158	0.058999663	33.52012685	0.695928936
ENSG00000246627	CACNA1C-AS1	2676001	2691200	12	antisense	22	1.569008585	0.05887782	-16.60785317	0.659793946
ENSG00000214381	LINC00488	109178165	109185257	3	lincRNA	3	1.568202858	0.058847548	-6.439646288	0.667123746
ENSG00000223768	LINC00205	45293285	45297354	21	lincRNA	8	1.567855033	0.05883448	-48.03093492	0.63714247
ENSG00000229372	SZT2-AS1	43447776	43448644	1	antisense	15	1.567398439	0.058817325	-27.32353489	0.652069496
ENSG00000254109	RBPMS-AS1	30382119	30385401	8	antisense	2	1.566857487	0.058797001	-9.818540993	0.664688053
ENSG00000242474	AC093627.9	135853	149466	7	lincRNA	1	1.566667219	0.058789852	28.63257582	0.692405722
ENSG00000228434	AC004951.6	44004046	44007866	7	lincRNA	4	1.566353272	0.058778057	0.819914895	0.672356834
ENSG00000258844	RP11-259K15.2	36214607	36235608	14	lincRNA	2	1.56380531	0.058682327	-70.47727019	0.620961923
ENSG00000231758	AC092652.1	143640756	143656179	2	antisense	1	1.562292239	0.05862548	-2.321546834	0.670092297
ENSG00000236498	AC107081.5	61868432	61886082	2	antisense	4	1.558260635	0.058474008	-64.13707318	0.625532284
ENSG00000255198	SNHG9	1964959	1965509	16	lincRNA	4	1.555346086	0.058364505	-20.98357898	0.656639683
ENSG00000229618	AC011288.2	13101391	13704149	7	lincRNA	3	1.551041414	0.058202774	-12.42420654	0.662809747
ENSG00000228801	RP11-110G21.1	51899325	51947173	8	antisense	1	1.550164103	0.058169813	28.70673695	0.692459181
ENSG00000253878	RP11-347C18.3	94950037	94951396	8	sense_intronic	1	1.545451594	0.057992759	-0.361288341	0.671505358
ENSG00000247473	CARS-AS1	3029009	3041260	11	antisense	18	1.544935896	0.057973383	-41.15566767	0.642098538
ENSG00000258660	RP4-693M11.3	73698103	73700351	14	antisense	7	1.54399944	0.0579382	5.308507184	0.675592457
ENSG00000116883	RP11-268J15.5	36323734	36329221	1	antisense	11	1.535654105	0.057624657	-58.23714832	0.629785273
ENSG00000226526	RP1-37C10.3	16978926	17005091	1	antisense	6	1.530257662	0.057421906	-28.26234686	0.651392749
ENSG00000146521	LINC01558	167784537	167796859	6	lincRNA	1	1.52977743	0.057403864	20.58687273	0.686605939
ENSG00000254319	RP11-134O21.1	2666079	2728451	8	lincRNA	1	1.528475137	0.057354935	12.00061643	0.680416496
ENSG00000179066	CTD-2527I21.15	35105969	35107318	19	lincRNA	10	1.528233288	0.057345849	-47.79433892	0.637313021
ENSG00000232018	AL132709.8	100960509	100967040	14	lincRNA	1	1.527522543	0.057319145	-7.37119309	0.666452236
ENSG00000254680	RP11-265D17.2	12261426	12263173	11	antisense	1	1.523525001	0.057168953	-14.76638634	0.661121376
ENSG00000229257	RP11-229P13.22	137057663	137062461	9	antisense	2	1.515184635	0.056855597	-9.419749471	0.664975524
ENSG00000230955	RP11-109P14.10	37860697	37861580	1	antisense	11	1.514285279	0.056821807	-33.62065349	0.647530189
ENSG00000235790	RP11-73M7.6	31644049	31660162	1	antisense	10	1.510512583	0.056680063	-65.74948612	0.624369969
ENSG00000224848	RP11-535M15.1	96687056	96721121	9	lincRNA	1	1.510337438	0.056673482	-6.395573786	0.667155515
ENSG00000237879	LINC00398	30803206	30810645	13	lincRNA	3	1.506118903	0.056514988	-10.29997186	0.664341012
ENSG00000228223	HCG11	26523450	26526579	6	lincRNA	12	1.502607632	0.056383065	-32.56491619	0.648291222
ENSG00000179406	LINC00174	66376044	66401338	7	lincRNA	11	1.502183262	0.056367121	-26.28763269	0.652816231
ENSG00000247157	LINC01252	11548030	11590369	12	lincRNA	10	1.500742131	0.056312977	-66.7831605	0.62362484
ENSG00000227033	AC105461.1	231978488	232015720	2	antisense	12	1.492823898	0.05601548	-34.94748947	0.646573733
ENSG00000243715	CACNA2D3-AS1	54874605	54901255	3	antisense	3	1.49016705	0.05591566	-1.85696631	0.670427192
ENSG00000235026	DPP10-AS1	115130935	115161343	2	antisense	3	1.489528328	0.055891662	-14.09680286	0.661604048
ENSG00000225342	AC079630.4	40186009	40224915	12	antisense	3	1.485652486	0.055746043	-15.31660636	0.660724747
ENSG00000236472	AC002401.1	50135586	50146176	17	antisense	3	1.484950805	0.05571968	-12.5664166	0.662707234
ENSG00000228133	AC099684.1	2017716	2020706	17	antisense	1	1.479941479	0.055531474	14.45906219	0.682188678
ENSG00000204685	STARD7-AS1	96208416	96242621	2	processed_transcript	1	1.478033114	0.055459775	18.55349684	0.68514017
ENSG00000257715	RP11-256L6.2	96025323	96027971	12	antisense	1	1.474041532	0.055309807	29.48610014	0.693020989
ENSG00000231252	RP11-436K8.1	60659631	60867998	1	lincRNA	1	1.468362339	0.055096433	-2.892828268	0.669680486
ENSG00000238221	RP11-69L16.4	7276031	7298872	6	antisense	1	1.466894112	0.05504127	6.759556263	0.676638453
ENSG00000258342	RP11-116N8.1	35897982	36063743	14	sense_overlapping	10	1.453874266	0.054552101	-38.55561224	0.643972801
ENSG00000232940	HCG25	33249534	33254989	6	antisense	2	1.441785428	0.05409791	-33.70888818	0.647466584
ENSG00000257764	RP11-1143G9.4	69353493	69354225	12	antisense	2	1.438619727	0.053978972	-18.53204969	0.65840688
ENSG00000174403	C20orf166-AS1	62544343	62551526	20	antisense	1	1.428899922	0.053613788	-29.93468261	0.650187238
ENSG00000227082	CH17-437K3.1	121396754	121463129	1	lincRNA	7	1.423641068	0.053416208	-9.18261767	0.665146462
ENSG00000237798	AC010894.5	174575227	174587726	2	antisense	10	1.422295416	0.05336565	-48.50666804	0.636799535
ENSG00000240005	RP11-293A21.1	26859806	26860599	4	antisense	1	1.421946223	0.05335253	-16.561541	0.65982733
ENSG00000231742	LINC01273	50172550	50176671	20	lincRNA	2	1.419791925	0.053271591	-38.37985816	0.644099494
ENSG00000249971	RP11-256P1.1	138347027	138349641	5	antisense	2	1.417147005	0.053172219	-25.71801	0.653226846
ENSG00000254343	RP11-760H22.2	120052180	120056201	8	lincRNA	1	1.412701112	0.053005182	9.360181469	0.678513126
ENSG00000255284	AP006621.5	777578	784297	11	lincRNA	4	1.41096828	0.052940077	-11.28073374	0.663634025
ENSG00000246523	RP11-736K20.6	86955619	87000959	11	lincRNA	2	1.401257946	0.05257525	-28.83848892	0.650977435
ENSG00000237133	AC020594.5	33555047	33563547	2	antisense	10	1.399906716	0.052524483	-31.74516998	0.64888214
ENSG00000235445	XXbac-B476C20.14	17983205	17983619	22	sense_intronic	4	1.399304431	0.052501854	-17.56925649	0.659100914
ENSG00000250107	CACNA1G-AS1	50556207	50562108	17	antisense	3	1.394161617	0.052308633	-9.545680031	0.664884747
ENSG00000246375	RP11-10L7.1	88284942	88331421	4	lincRNA	2	1.39406011	0.05230482	-15.48111544	0.66060616
ENSG00000237976	RP11-126K1.6	151346967	151348027	1	antisense	3	1.393608501	0.052287852	-27.86799543	0.651677019
ENSG00000240963	RP11-518L10.5	244375100	244409592	1	antisense	4	1.389373114	0.052128724	16.81620556	0.683887836
ENSG00000254129	CTD-2647L4.1	29110573	29140729	8	antisense	10	1.386406475	0.052017264	-34.85731936	0.646638732
ENSG00000233421	RP5-875O13.1	16533886	16536172	1	lincRNA	1	1.385722835	0.051991579	14.74439527	0.682394362
ENSG00000243888	RP11-548B3.3	69428248	69428721	9	3prime_overlapping_ncrna	3	1.383376773	0.051903435	-1.265840925	0.670853307
ENSG00000251575	CTD-2170G1.2	61732774	61735669	5	lincRNA	1	1.382142651	0.051857068	-9.892278769	0.664634899
ENSG00000226143	RP1-138B7.5	43549389	43550949	20	antisense	11	1.380167603	0.051782863	-42.03086159	0.641467651
ENSG00000259083	RP11-407N17.4	39174885	39175880	14	antisense	6	1.370224126	0.051409276	-24.87911212	0.65383157
ENSG00000224713	AC025165.8	57612118	57619638	12	antisense	3	1.3670349	0.051289454	6.801588573	0.676668752
ENSG00000250616	RP11-455F5.3	30096430	30104116	16	antisense	8	1.366532999	0.051270597	-45.18336453	0.639195154
ENSG00000237990	CNTN4-AS1	3039033	3069242	3	antisense	18	1.363910537	0.051172068	-9.78382562	0.664713078
ENSG00000227028	SLC8A1-AS1	39786453	40255209	2	antisense	12	1.362890192	0.051133733	-12.12280913	0.663027011
ENSG00000255176	AP002954.3	118636620	118638097	11	antisense	11	1.361198	0.051070155	-93.99542468	0.604008751
ENSG00000257225	RP11-328C8.4	42459366	42466128	12	antisense	7	1.356944886	0.050910361	-10.41843875	0.664255614
ENSG00000256034	RP11-707G14.1	73760563	73761070	11	antisense	1	1.355033149	0.050838535	-25.9126228	0.653086559
ENSG00000229407	RP11-12M5.3	179816184	179818191	1	antisense	3	1.35340031	0.050777188	-19.57201183	0.657657218
ENSG00000254192	CTC-558O2.2	168654513	168667761	5	antisense	1	1.352688211	0.050750433	1.326566525	0.672722057
ENSG00000255402	RP11-696P8.2	109973943	109974781	8	antisense	18	1.346538778	0.050519393	-23.62971327	0.654732205
ENSG00000226017	PRICKLE2-AS3	64187544	64200965	3	antisense	12	1.342392632	0.050363617	-10.8188596	0.663966969
ENSG00000230140	AC016738.3	100972648	100977161	2	antisense	3	1.340719044	0.050300739	-14.92393439	0.661007807
ENSG00000235786	ZNRF3-IT1	28992721	29018620	22	sense_intronic	4	1.340577866	0.050295435	-21.3492783	0.656376067
ENSG00000223548	AC034228.3	132003592	132007022	5	antisense	2	1.33775341	0.050189317	-10.56278127	0.664151564
ENSG00000235079	ZRANB2-AS1	71048855	71067184	1	antisense	4	1.337387387	0.050175565	-18.03431607	0.658765673
ENSG00000237166	AC007163.3	200712305	200735177	2	lincRNA	10	1.334714545	0.050075144	-19.26681587	0.65787722
ENSG00000225733	FGD5-AS1	14920347	14948424	3	antisense	1	1.333677067	0.050036164	36.88280046	0.698352935
ENSG00000236733	RP11-203L2.4	68822403	68843275	9	antisense	3	1.3274908	0.04980374	-3.69193808	0.669104444
ENSG00000250378	RP11-119J18.1	135812667	135826582	5	lincRNA	2	1.327351505	0.049798506	-0.579696487	0.671347918
ENSG00000225742	RP11-513G11.4	194203016	194250153	3	lincRNA	1	1.322048383	0.049599262	13.95249472	0.681823516
ENSG00000254791	FAR1-IT1	13669327	13670149	11	sense_intronic	4	1.314278833	0.049307352	-15.48115904	0.660606129
ENSG00000237880	AC096669.2	107385632	107542649	2	lincRNA	3	1.311746327	0.049212203	-11.83425169	0.663235019
ENSG00000250240	CTD-2154I11.2	95701249	95732295	5	antisense	1	1.30977826	0.049138261	15.294097	0.682790617
ENSG00000253358	GS1-251I9.3	91016588	91018655	8	antisense	7	1.308637953	0.049095418	-3.807130674	0.669021407
ENSG00000254260	RP11-369E15.1	20941428	20950175	8	lincRNA	3	1.30771389	0.0490607	-4.646319102	0.668416474
ENSG00000242349	NPPA-AS1	11841017	11848079	1	antisense	3	1.301398276	0.048823416	-1.194138351	0.670904995
ENSG00000255090	MIR100HG	122155422	122422871	11	lincRNA	1	1.300797346	0.048800838	20.966432	0.686879546
ENSG00000230105	RP11-431N15.2	56618391	56624458	X	lincRNA	1	1.296250335	0.048630002	20.74089401	0.686716966
ENSG00000232907	DLGAP4-AS1	36507702	36573391	20	antisense	8	1.287996522	0.048319898	-27.4691489	0.65196453
ENSG00000240859	AC093627.10	149597	155465	7	lincRNA	3	1.286977623	0.048281617	-17.91153679	0.658854179
ENSG00000229847	EMX2OS	117473215	117545068	10	antisense	2	1.28284442	0.048126328	3.588488687	0.674352574
ENSG00000233705	SLC26A4-AS1	107653968	107662151	7	antisense	3	1.282098884	0.048098317	-14.69381728	0.661173688
ENSG00000232903	LINC01166	132943967	132965289	10	lincRNA	3	1.281560104	0.048078075	-5.715275898	0.667645911
ENSG00000253961	RP11-363L24.3	31167078	31177167	8	antisense	1	1.279938288	0.048017141	13.12173134	0.681224657
ENSG00000254568	RP11-664I21.5	124883691	124887789	11	antisense	21	1.27897531	0.047980961	-46.38298096	0.638330405
ENSG00000223403	MEG9	101069911	101072937	14	lincRNA	11	1.278948506	0.047979954	-56.69013704	0.630900443
ENSG00000259065	RP5-1021I20.1	73787360	73803270	14	antisense	2	1.278452078	0.047961303	3.604676683	0.674364243
ENSG00000233589	RP4-694A7.2	68479129	68483539	1	antisense	1	1.275943342	0.047867047	0.031735649	0.671788672
ENSG00000185065	AC000068.5	19447893	19450105	22	antisense	1	1.27349896	0.047775209	17.19970122	0.68416428
ENSG00000248161	RP11-499E18.1	102418602	102450010	4	lincRNA	2	1.272672452	0.047744156	-23.74349009	0.654650188
ENSG00000243799	PEX5L-AS1	179875376	179881609	3	antisense	5	1.272304932	0.047730348	-20.6860411	0.656854165
ENSG00000256633	RP11-169D4.2	72584572	72587979	11	antisense	3	1.271464856	0.047698785	0.319069869	0.671995798
ENSG00000225988	LAMP5-AS1	9505180	9514998	20	antisense	3	1.269800035	0.047636236	-16.18446999	0.660099144
ENSG00000250366	TUNAR	95876392	95925571	14	lincRNA	3	1.266564006	0.047514655	-2.665352707	0.669844463
ENSG00000255980	AP000439.1	69425690	69429621	11	lincRNA	2	1.265237787	0.047464828	-31.58453831	0.648997932
ENSG00000247556	OIP5-AS1	41283990	41309737	15	processed_transcript	7	1.262436238	0.047359571	-21.36569753	0.656364231
ENSG00000223751	AC116609.2	742488	747767	2	lincRNA	1	1.258514405	0.047212223	7.743041104	0.677347402
ENSG00000237399	PITRM1-AS1	3141632	3167972	10	antisense	3	1.25812398	0.047197555	3.161524942	0.674044795
ENSG00000224020	MIR181A2HG	124658467	124698631	9	antisense	1	1.25653854	0.047137988	7.972706671	0.677512958
ENSG00000243902	ELFN2	37339583	37427445	22	sense_overlapping	17	1.256136703	0.04712289	-35.84063202	0.645929907
ENSG00000255693	RP11-766N7.3	64883394	64977522	12	lincRNA	3	1.252959942	0.047003536	-11.07269943	0.663783987
ENSG00000226950	DANCR	52712404	52720351	4	processed_transcript	5	1.240460968	0.046533936	6.230547299	0.676257114
ENSG00000237836	PHKA2-AS1	18890296	18894497	X	antisense	15	1.239770931	0.046508011	-48.61724053	0.636719828
ENSG00000231113	RP3-475N16.1	42940364	42948360	6	antisense	6	1.239216702	0.046487188	-23.81480603	0.65459878
ENSG00000248019	FAM13A-AS1	88709789	88730103	4	antisense	6	1.237901157	0.046437762	-7.723576135	0.666198219
ENSG00000259001	RPPH1	20343048	20343685	14	antisense	0	1.234321205	0.046303259	-38.14311303	0.644270152
ENSG00000258459	CTD-2292M16.7	20305730	20306811	14	antisense	1	1.234191358	0.04629838	8.691677089	0.678031231
ENSG00000233735	RP11-567G24.3	240177839	240179644	1	antisense	22	1.232046075	0.04621778	-18.3478501	0.658539661
ENSG00000245904	RP11-796E2.4	92145573	92189660	12	antisense	1	1.231222095	0.046186822	-2.564550297	0.669917127
ENSG00000214783	POLR2J4	43940895	44019175	7	processed_transcript	1	1.22875901	0.046094281	-15.96377658	0.660258231
ENSG00000251034	RP11-582J16.4	22540845	22545405	8	antisense	1	1.228706746	0.046092318	-7.823952913	0.666125862
ENSG00000227199	ST7-AS1	116952446	116954334	7	antisense	3	1.22609472	0.045994181	-14.31525542	0.661446576
ENSG00000259330	INAFM2	40325216	40326715	15	antisense	1	1.221791711	0.045832513	-5.897705402	0.667514406
ENSG00000236778	INTS6-AS1	51452367	51552364	13	antisense	2	1.220041803	0.045766767	-28.7942771	0.651009305
ENSG00000258920	FOXN3-AS1	89417354	89419793	14	antisense	2	1.219542109	0.045747993	-15.71021001	0.660441016
ENSG00000223930	RP11-33A14.1	178202050	178385417	3	lincRNA	3	1.218930244	0.045725004	-6.528516452	0.667059683
ENSG00000251293	CTC-552D5.1	120245448	120333502	5	lincRNA	1	1.218907331	0.045724143	-16.74650453	0.659693998
ENSG00000234617	SNRK-AS1	43349644	43351962	3	antisense	4	1.218271685	0.045700261	-31.23258352	0.64925164
ENSG00000204860	FAM201A	38620474	38624990	9	antisense	3	1.217348472	0.045665575	-19.63152456	0.657614318
ENSG00000254964	RP11-831H9.3	62606161	62606405	11	antisense	4	1.216429204	0.045631037	-24.58251989	0.65404537
ENSG00000256443	RP11-794G24.1	61539516	61542259	11	lincRNA	5	1.215778368	0.045606585	-21.33298868	0.65638781
ENSG00000233108	AC006042.7	7958183	7969903	7	antisense	1	1.212134268	0.045469672	10.71791807	0.679491856
ENSG00000228288	PCAT6	202810954	202812156	1	antisense	7	1.210783147	0.045418909	-21.68519496	0.65613392
ENSG00000232347	RP11-488L18.8	247210691	247241823	1	lincRNA	1	1.206783376	0.045268633	13.0918465	0.681203114
ENSG00000242282	AC108488.4	3531813	3536873	2	lincRNA	4	1.206684153	0.045264905	-28.33055777	0.651343579
ENSG00000251226	RP11-469N6.1	134735596	134763810	11	lincRNA	3	1.206511501	0.045258419	-14.42166436	0.66136987
ENSG00000244493	SLC9A9-AS2	143381338	143382161	3	antisense	10	1.205855273	0.045233764	-30.1431532	0.650036961
ENSG00000255650	FAM222A-AS1	109734166	109773508	12	antisense	1	1.205340375	0.045214418	-6.804286159	0.666860893
ENSG00000250761	RP11-711G10.1	7707802	7749766	5	antisense	1	1.203816051	0.045157148	-8.594363306	0.665570508
ENSG00000235513	RP4-756G23.5	41209122	41217627	22	antisense	12	1.199734515	0.0450038	-15.47068792	0.660613677
ENSG00000242086	LINC00969	195658062	195739964	3	lincRNA	11	1.199500076	0.044994992	-4.454587767	0.668554684
ENSG00000203709	C1orf132	207801518	207869150	1	lincRNA	10	1.19868049	0.044964199	-61.00949145	0.627786816
ENSG00000256196	RP11-881M11.4	60918469	60925397	11	antisense	3	1.198611157	0.044961594	-4.519523826	0.668507875
ENSG00000221817	PPP3CB-AS1	73495525	73520070	10	processed_transcript	10	1.196740289	0.044891304	-19.24110093	0.657895757
ENSG00000257698	RP11-620J15.3	57931528	57936175	12	lincRNA	25	1.196338239	0.044876198	-44.29603884	0.639834787
ENSG00000231903	AC079354.5	202178660	202179391	2	antisense	5	1.19225168	0.044722662	-27.93175943	0.651631055
ENSG00000246982	RP1-179N16.6	36146698	36197205	6	antisense	4	1.19206484	0.044715642	-52.33603081	0.634039121
ENSG00000258761	RP11-24J19.1	92162798	92172436	15	antisense	1	1.191109022	0.044679731	-3.036252737	0.669577098
ENSG00000231327	AC016700.5	70124036	70125317	2	lincRNA	2	1.187487312	0.04454366	-21.02917117	0.656606818
ENSG00000213971	RP11-15H20.6	23259906	23274251	19	processed_transcript	1	1.187264565	0.044535291	13.18244329	0.681268421
ENSG00000233508	RP1-269M15.3	43190101	43202599	20	lincRNA	7	1.185821548	0.044481075	-11.97085549	0.663136547
ENSG00000236859	NIFK-AS1	121649650	121728481	2	antisense	6	1.181886131	0.044333217	-24.37160375	0.65419741
ENSG00000255542	RP4-683L5.1	35419057	35421002	11	antisense	2	1.180662221	0.044287234	-1.924393304	0.670378587
ENSG00000257514	RP11-755O11.2	101646720	101659970	12	antisense	3	1.180296876	0.044273507	-2.13709725	0.670225258
ENSG00000231013	AC013275.2	119476448	119487346	2	antisense	1	1.174965773	0.044073212	-23.68418118	0.654692942
ENSG00000235010	RP11-140A10.3	132181225	132185962	10	antisense	5	1.174298949	0.044048159	-37.57361213	0.64468068
ENSG00000234577	SYNE1-AS1	152380546	152381564	6	antisense	5	1.172168995	0.043968134	-26.31491365	0.652796566
ENSG00000258908	RP11-203M5.8	20474789	20477089	14	lincRNA	2	1.17181288	0.043954755	-3.970586178	0.668903579
ENSG00000228315	GUSBP11	23638487	23717356	22	processed_transcript	11	1.169847558	0.043880915	31.97406961	0.694814453
ENSG00000234431	AC007283.5	201166965	201167546	2	3prime_overlapping_ncrna	4	1.164336692	0.043673866	-18.51226971	0.658421138
ENSG00000211683	KB-1572G7.3	23630618	23638941	22	processed_transcript	11	1.15926315	0.043483248	1.588658682	0.672910987
ENSG00000185837	CECR5-AS1	17159384	17165445	22	antisense	4	1.158533077	0.043455818	-25.36882615	0.653478557
ENSG00000259125	LRP1-AS	57144620	57147619	12	antisense	6	1.156599786	0.043383183	-4.7208725	0.668362732
ENSG00000225683	PACRG-AS3	163165414	163192002	6	antisense	1	1.155046051	0.043324807	0.232251323	0.671933214
ENSG00000237919	RP11-181B18.1	70013982	70031222	1	antisense	1	1.151935126	0.043207926	-1.11447253	0.670962422
ENSG00000223573	TINCR	5558167	5568034	19	lincRNA	3	1.148854214	0.043092173	-10.97569434	0.663853914
ENSG00000259291	RP11-617F23.1	90074512	90082207	15	antisense	4	1.14810386	0.043063982	-14.77019979	0.661118627
ENSG00000256699	RP11-669N7.3	129208601	129212662	12	lincRNA	3	1.14609509	0.04298851	-0.611135783	0.671325255
ENSG00000233016	SNHG7	136721366	136728184	9	antisense	8	1.141006431	0.042797324	-39.6040904	0.643217
ENSG00000229780	UBE2Q1-AS1	154553609	154555017	1	antisense	22	1.140968534	0.0427959	-28.35064424	0.6513291
ENSG00000249252	RP11-665G4.1	15004942	15427914	4	antisense	7	1.140132411	0.042764486	-9.750895495	0.664736816
ENSG00000255337	RP11-315O6.1	102452919	102462008	11	antisense	2	1.137753299	0.0426751	-17.34160928	0.659265014
ENSG00000238184	CD81-AS1	2328749	2377992	11	antisense	2	1.137352912	0.042660057	-1.344048629	0.670796931
ENSG00000225905	RP4-758J18.7	1420245	1422691	1	antisense	10	1.135909561	0.042605829	-42.1993726	0.641346179
ENSG00000223749	MIR503HG	134543337	134546632	X	lincRNA	1	1.133648058	0.042520862	-24.11944128	0.654379182
ENSG00000227528	DIAPH3-AS1	60012751	60044357	13	antisense	1	1.132592705	0.042481211	-0.37496068	0.671495503
ENSG00000254317	RP11-473O4.5	129832301	129844504	8	antisense	2	1.131823764	0.042452321	-26.72576096	0.652500404
ENSG00000225056	RP11-218C14.5	23655225	23656390	20	lincRNA	2	1.131230242	0.042430022	-13.47268941	0.662053943
ENSG00000215244	RP11-563J2.2	6277687	6335982	10	lincRNA	2	1.13110828	0.04242544	4.545901499	0.675042729
ENSG00000235016	SEMA3F-AS1	50116022	50156085	3	antisense	15	1.13098862	0.042420944	-32.1702781	0.648575699
ENSG00000245025	RP11-875O11.1	22984596	23019335	8	antisense	3	1.130797771	0.042413773	-2.533990547	0.669939156
ENSG00000225335	XXbac-B476C20.9	18076527	18078884	22	antisense	10	1.128673638	0.042333967	-39.35767017	0.643394633
ENSG00000257769	CTB-193M12.1	15608474	15610563	16	antisense	7	1.127905645	0.042305113	-10.3148843	0.664330262
ENSG00000231951	AC004837.4	39609610	39610290	7	antisense	1	1.125181737	0.042202773	18.97389362	0.685443215
ENSG00000234456	MAGI2-AS3	79452877	79471208	7	processed_transcript	28	1.121162219	0.042051755	-43.74532715	0.64023177
ENSG00000182109	RP11-69E11.4	39522280	39546187	1	antisense	11	1.119617422	0.041993716	13.18331344	0.681269048
ENSG00000232814	COL4A2-AS1	110502575	110508179	13	antisense	8	1.116168216	0.041864125	-28.95608574	0.650892664
ENSG00000258057	BCDIN3D-AS1	49828542	49841143	12	antisense	12	1.11386848	0.041777722	-27.04816014	0.652268001
ENSG00000257748	RP11-966I7.3	28800084	28830204	14	lincRNA	1	1.110050318	0.04163427	14.49462051	0.68221431
ENSG00000241269	AC093620.5	5419827	5420767	7	antisense	7	1.106465218	0.041499573	-15.52427495	0.660575048
ENSG00000226067	LINC00623	120913275	121009291	1	lincRNA	1	1.101772872	0.041323277	-4.667017392	0.668401553
ENSG00000189275	LINC01164	131772398	131790199	10	lincRNA	1	1.09732081	0.041156008	-8.312388996	0.66577377
ENSG00000255968	RP11-513G19.1	26318953	26421462	12	antisense	4	1.097240219	0.04115298	-13.44312696	0.662075254
ENSG00000229400	RP11-3L21.2	224717504	224730662	1	antisense	18	1.096081596	0.04110945	-11.00373019	0.663833704
ENSG00000257202	RP11-512N21.3	101923410	101924719	12	antisense	2	1.088232709	0.040814559	-3.399645385	0.669315144
ENSG00000231863	RP3-428L16.1	160931080	160969771	6	antisense	1	1.083442343	0.04063458	1.691048884	0.672984795
ENSG00000241345	RP4-630C24.3	123994622	124027659	7	antisense	1	1.08210513	0.040584339	-22.08656924	0.655844588
ENSG00000257579	RP11-128P10.1	107610034	107617721	12	antisense	3	1.077150147	0.040398175	1.029331139	0.672507793
ENSG00000229743	LINC01159	104865497	104872595	2	processed_transcript	7	1.074091157	0.040283246	-104.4991327	0.596437104
ENSG00000231711	LINC00899	46039907	46044853	22	processed_transcript	4	1.069965415	0.040128237	-24.57630526	0.65404985
ENSG00000240801	AC132217.4	2129121	2129964	11	3prime_overlapping_ncrna	29	1.068670091	0.04007957	-8.224194442	0.665837346
ENSG00000213062	RP1-206D15.6	169486076	169486986	1	lincRNA	12	1.066408317	0.039994593	-16.431706	0.659920922
ENSG00000157306	RP11-66N24.4	23511760	23560778	14	processed_transcript	4	1.066043875	0.039980901	-45.29194229	0.639116885
ENSG00000236756	DNAJC9-AS1	73247360	73276984	10	antisense	4	1.063068707	0.03986912	-52.28411931	0.634076542
ENSG00000233953	AC009970.1	60495686	60499964	2	antisense	0	1.0611466	0.039796905	-29.15424584	0.65074982
ENSG00000258940	RP11-407N17.5	39265703	39267061	14	antisense	3	1.058945907	0.039714222	-19.09753571	0.657999246
ENSG00000239593	RP11-477J21.6	121279863	121282730	9	antisense	1	1.056372212	0.039617526	-25.36460727	0.653481598
ENSG00000233237	LINC00472	71344344	71420769	6	lincRNA	2	1.055874561	0.039598829	-2.035950511	0.67029817
ENSG00000250917	RP4-785G19.5	34234840	34281173	20	sense_overlapping	5	1.054108846	0.039532489	-55.71890725	0.631600559
ENSG00000259238	RP11-361D15.2	59688517	59689418	15	antisense	8	1.053703927	0.039517276	-34.97813294	0.646551643
ENSG00000258517	RP6-91H8.1	71212633	71218216	14	lincRNA	5	1.050636466	0.039402028	-24.95659341	0.653775717
ENSG00000223821	RP11-505P4.6	73492025	73492742	6	antisense	1	1.047862805	0.039297818	8.736196389	0.678063323
ENSG00000235049	LINC00940	1929202	1936574	12	lincRNA	10	1.041901372	0.039073841	-18.8815333	0.658154953
ENSG00000228214	LINC00693	28574791	28758340	3	antisense	2	1.041711226	0.039066697	-3.451717657	0.669277608
ENSG00000257918	RP11-482D24.3	106714924	106733066	12	antisense	9	1.040658811	0.039027157	-5.103000716	0.668087273
ENSG00000237753	AC079922.3	112641832	112645690	2	lincRNA	1	1.039878384	0.038997835	12.09215893	0.680482484
ENSG00000253671	RP11-806O11.1	17808941	17820868	8	processed_transcript	2	1.039320536	0.038976876	-20.47997335	0.65700271
ENSG00000224879	AC011754.1	79158374	79185523	2	sense_overlapping	3	1.034628525	0.038800593	-4.651602505	0.668412665
ENSG00000259343	TMC3-AS1	81324377	81362037	15	antisense	10	1.028111825	0.038555753	-28.78929349	0.651012897
ENSG00000226828	RP11-278H7.1	243917402	244047317	1	lincRNA	3	1.025675261	0.038464209	-12.87289711	0.662486306
ENSG00000233223	AC113189.5	7581964	7584072	17	antisense	5	1.023916625	0.038398135	4.324152428	0.67488288
ENSG00000219545	UMAD1	7640711	8004059	7	antisense	7	1.023791338	0.038393428	-5.473201009	0.667820412
ENSG00000237036	ZEB1-AS1	31206278	31320447	10	antisense	3	1.023146002	0.038369182	-37.3750384	0.644823823
ENSG00000257524	RP11-203J24.9	127867864	127886787	9	processed_transcript	14	1.020597619	0.038273436	-26.00293162	0.653021459
ENSG00000248275	TRIM52-AS1	181261212	181272307	5	processed_transcript	5	1.020369258	0.038264857	-15.961478	0.660259888
ENSG00000232358	RP5-955M13.4	50999370	51010019	20	antisense	1	1.018875037	0.038208717	-3.616491588	0.66915883
ENSG00000255031	RP11-802E16.3	68050740	68053762	11	antisense	4	1.015492141	0.038081618	-11.83457085	0.663234789
ENSG00000241472	PTPRG-AS1	62260865	62369330	3	processed_transcript	1	1.013381014	0.038002301	10.64488297	0.679439209
ENSG00000231770	TMEM44-AS1	194584011	194590260	3	antisense	1	1.011727142	0.037940163	-22.48507376	0.655557324
ENSG00000186056	MATN1-AS1	30718504	30726827	1	antisense	10	1.009594057	0.037860021	-27.1023357	0.652228949
ENSG00000228793	RP1-223B1.1	3594247	3624747	6	lincRNA	2	1.005397655	0.037702358	-39.73013204	0.643126142
ENSG00000249669	MIR143HG	149406689	149428678	5	lincRNA	2	1.005340426	0.037700207	-42.66838984	0.641008085
ENSG00000225214	AC079790.2	152098328	152109202	2	antisense	7	1.002450444	0.037591628	-10.61929282	0.664110828
ENSG00000254081	LINC01299	65527008	65562780	8	lincRNA	10	1.001400231	0.03755217	-18.00865141	0.658784174
ENSG00000182912	TSPEAR-AS2	44517216	44525952	21	antisense	8	0.999653536	0.037486545	-20.79504956	0.656775586
ENSG00000233928	RP11-305F18.1	33726508	33942280	X	lincRNA	3	0.997147283	0.037392382	-0.373997055	0.671496197
ENSG00000253988	RP11-489O18.1	138063268	138073240	8	lincRNA	2	0.996517399	0.037368717	-26.65614324	0.652550589
ENSG00000255618	RP11-357K6.1	118773032	118775137	12	lincRNA	5	0.995978275	0.037348461	-10.02850306	0.664536701
ENSG00000227640	SOX21-AS1	94712716	94716246	13	lincRNA	9	0.99560459	0.037334422	-9.739708139	0.66474488
ENSG00000253629	KB-1107E3.1	101686547	101689093	8	antisense	1	0.994563435	0.037295304	-12.66267173	0.662637848
ENSG00000249849	RP11-1101H11.1	177682294	177713969	5	antisense	2	0.994191401	0.037281327	-44.58861696	0.639623881
ENSG00000257453	RP11-290L1.3	76030494	76031378	12	antisense	9	0.993677889	0.037262034	-53.8015683	0.632982681
ENSG00000230565	ZNF32-AS2	43645942	43648019	10	antisense	5	0.993083455	0.0372397	-25.20000556	0.653600252
ENSG00000254846	RP11-203M5.2	20344233	20346888	14	antisense	1	0.990725115	0.037151095	-19.57871197	0.657652388
ENSG00000232973	CYP1B1-AS1	38073447	38231651	2	antisense	3	0.987324188	0.037023318	-4.941101139	0.668203979
ENSG00000254307	KB-1608C10.2	94791643	94793106	8	antisense	2	0.986476312	0.036991463	-5.462622319	0.667828038
ENSG00000236526	RP4-742J24.2	11909404	11918677	20	antisense	3	0.981026584	0.036786711	-12.89438177	0.662470819
ENSG00000222044	RP5-1039K5.16	38032165	38034228	22	antisense	10	0.975430088	0.036576444	-52.61512764	0.633837933
ENSG00000215022	RP1-257A7.4	13264861	13295586	6	antisense	18	0.974441872	0.036539316	-12.79223953	0.662544449
ENSG00000234793	AC114730.7	241754793	241755740	2	antisense	11	0.973869767	0.036517821	-4.009092062	0.668875822
ENSG00000235949	AC061961.2	154696462	154697817	2	antisense	22	0.972435796	0.036463946	-20.19675693	0.657206868
ENSG00000234638	AC053503.6	219425071	219426184	2	antisense	2	0.970719459	0.036399461	-21.01480124	0.656617177
ENSG00000237438	CECR7	17036570	17060825	22	lincRNA	3	0.968552188	0.036318034	-5.732154773	0.667633744
ENSG00000259031	CTD-2062F14.3	100538939	100540409	14	lincRNA	3	0.967431263	0.03627592	-17.11079046	0.659431401
ENSG00000230910	RP3-525N10.2	68629962	68635027	6	antisense	11	0.961147719	0.03603984	-23.52027709	0.654811093
ENSG00000257000	RP13-820C6.2	132077803	132080460	12	antisense	6	0.960960892	0.036032821	-0.723857678	0.671243999
ENSG00000233554	B4GALT1-AS1	33166975	33179983	9	antisense	6	0.955659818	0.035833654	-16.89827246	0.659584596
ENSG00000224525	RP11-561I11.3	242203555	242210827	1	antisense	2	0.95236574	0.035709892	-4.737973349	0.668350404
ENSG00000232803	SLCO4A1-AS1	62663019	62666724	20	antisense	1	0.952152926	0.035701897	-10.2909186	0.664347538
ENSG00000224460	RP11-439L18.2	142946047	142956698	6	lincRNA	1	0.950702712	0.03564741	-8.297455834	0.665784535
ENSG00000254099	AC005740.5	141970637	141982687	5	antisense	7	0.949422318	0.035599305	-9.816612886	0.664689443
ENSG00000205696	ADARB2-AS1	1526637	1556984	10	antisense	1	0.94558521	0.03545514	-1.499765565	0.670684682
ENSG00000254855	RP11-867G23.1	66264777	66265666	11	antisense	3	0.944853972	0.035427667	3.400135369	0.674216798
ENSG00000258114	CTA-109P11.4	117425194	117490419	10	lincRNA	2	0.938462603	0.035187537	4.16396448	0.674767408
ENSG00000226167	AP4B1-AS1	113856635	113901237	1	antisense	1	0.936855495	0.035127156	-18.9571361	0.658100454
ENSG00000255139	AP000442.1	59616429	59639861	11	antisense	6	0.934548128	0.035040466	-9.950666059	0.66459281
ENSG00000236494	RP11-89N17.4	33793168	33803156	7	lincRNA	2	0.933949364	0.035017969	-7.3119836	0.666494917
ENSG00000225138	CTD-2228K2.7	473236	480884	5	processed_transcript	15	0.931768295	0.034936024	-32.76795962	0.648144857
ENSG00000255153	TOLLIP-AS1	1309769	1310707	11	antisense	2	0.92990336	0.034865957	-20.97806355	0.656643659
ENSG00000226310	RP3-323P24.3	57121662	57127243	X	antisense	1	0.928399444	0.034809453	6.796687826	0.676665219
ENSG00000223374	AC005104.3	241351340	241353104	2	antisense	2	0.926901311	0.034753166	5.68995367	0.675867425
ENSG00000174680	GRIK1-AS1	29748175	29764002	21	antisense	4	0.926138996	0.034724525	-27.02129157	0.65228737
ENSG00000259175	RP11-379K22.2	80554609	80562944	15	antisense	5	0.925647443	0.034706057	-9.142542498	0.66517535
ENSG00000238123	MID1IP1-AS1	38801568	38803883	X	antisense	9	0.924814874	0.034674777	-16.99998629	0.659511275
ENSG00000227484	XX-C283C717.1	50314631	50316008	22	antisense	17	0.922733264	0.034596569	-14.5053418	0.661309551
ENSG00000231233	CFAP58-AS1	104351591	104353575	10	antisense	7	0.922592543	0.034591281	-21.34616538	0.656378311
ENSG00000226416	MRPL23-AS1	1983237	1989920	11	antisense	11	0.922524224	0.034588715	-33.65443566	0.647505837
ENSG00000226696	LENG8-AS1	54444813	54449045	19	antisense	11	0.91995574	0.034492214	-11.77168389	0.663280121
ENSG00000254501	AP003068.9	65110714	65111695	11	antisense	8	0.917683486	0.034406843	-24.58055193	0.654046788
ENSG00000225602	MTOR-AS1	11143898	11149537	1	antisense	12	0.917407098	0.034396459	-7.077147887	0.6666642
ENSG00000233639	LINC01158	104807572	104853183	2	processed_transcript	5	0.917351102	0.034394355	-22.7681601	0.65535326
ENSG00000225889	AC074289.1	64143239	64252859	2	antisense	4	0.910307039	0.034129702	-29.57791145	0.650444418
ENSG00000228459	LINC01546	3271820	3284653	X	lincRNA	2	0.909532435	0.034100599	-11.06297442	0.663790998
ENSG00000212694	LINC01089	121795267	121803906	12	lincRNA	11	0.907340157	0.034018233	14.51688759	0.682230362
ENSG00000227388	RP11-112J3.16	35772163	35790432	9	lincRNA	4	0.906357556	0.033981316	-40.54614459	0.642537916
ENSG00000243230	RP11-286H14.8	129209775	129213545	7	antisense	9	0.905367424	0.033944115	-1.826563661	0.670449108
ENSG00000257261	RP11-96H19.1	46383679	46876159	12	lincRNA	2	0.904924892	0.033927489	-10.27613743	0.664358193
ENSG00000198491	RP11-208N14.4	187197090	187207629	3	antisense	7	0.904813464	0.033923303	-21.90972498	0.655972067
ENSG00000248980	RP11-87F15.2	176308268	176320458	4	antisense	12	0.901054582	0.033782077	-26.05670596	0.652982696
ENSG00000234418	RP11-560I19.1	122216347	122218437	7	lincRNA	2	0.89969508	0.033730999	-18.0064464	0.658785763
ENSG00000225619	MYT1L-AS1	2319232	2327110	2	antisense	25	0.899563064	0.033726039	-19.58820505	0.657645545
ENSG00000259314	CTD-3065B20.3	90604225	90614558	15	antisense	6	0.898417411	0.033682996	-2.78853133	0.669755669
ENSG00000228084	RP5-884G6.2	99968383	99969864	1	antisense	3	0.896918769	0.03362669	-10.3725192	0.664288716
ENSG00000246100	LINC00900	115754248	115760627	11	lincRNA	3	0.89680541	0.033622431	-9.307978957	0.665056094
ENSG00000239922	RP11-71N10.1	147940004	148006755	3	lincRNA	1	0.893523474	0.033499126	-4.104541771	0.668807017
ENSG00000251018	HMMR-AS1	163483065	163494058	5	antisense	0	0.892834489	0.03347324	-128.1281469	0.579404018
ENSG00000173727	CMB9-22P13.1	65455258	65466720	11	lincRNA	8	0.892633712	0.033465696	-25.13889008	0.653644308
ENSG00000226706	RP11-426A6.5	135503273	135506447	9	antisense	8	0.892486144	0.033460152	-24.03911609	0.654437085
ENSG00000226180	RP11-278A23.1	87693537	87696147	16	lincRNA	15	0.887678177	0.033279512	-26.33724572	0.652780467
ENSG00000231305	RP11-723O4.2	128861313	128871540	3	antisense	8	0.885970318	0.033215346	-24.99131103	0.653750691
ENSG00000230728	RP11-240D10.4	54621477	54628438	1	sense_overlapping	4	0.88434756	0.033154377	-14.38711231	0.661394777
ENSG00000228124	RP1-122O8.7	89673469	89675783	6	antisense	6	0.884110416	0.033145467	-1.606379448	0.670607829
ENSG00000258959	RP11-1017G21.4	102036315	102066228	14	antisense	17	0.882745331	0.033094179	-12.24034597	0.662942284
ENSG00000228109	MFI2-AS1	196999460	197004744	3	antisense	7	0.87835401	0.032929193	-18.65772902	0.658316283
ENSG00000253390	CTC-756D1.2	23458601	23484971	8	lincRNA	1	0.878084767	0.032919077	6.959943181	0.676782903
ENSG00000230725	RP4-738P15.1	25140789	25149258	20	lincRNA	1	0.877886582	0.032911631	1.973449193	0.673188365
ENSG00000258919	RP11-1029J19.4	101628984	101632530	14	lincRNA	3	0.876240615	0.03284979	-21.6156438	0.656184056
ENSG00000224505	AC002117.1	45150400	45161510	17	antisense	8	0.87268645	0.032716256	-21.91433956	0.65596874
ENSG00000244219	GS1-259H13.2	99598066	99610813	7	lincRNA	2	0.87159199	0.032675136	-23.00413549	0.655183156
ENSG00000258882	CTD-2277K2.1	61811974	61970319	14	lincRNA	12	0.866889295	0.032498451	-4.136900526	0.668783691
ENSG00000250284	CTB-1I21.1	136734927	136754686	5	lincRNA	2	0.86549852	0.032446198	-5.692832682	0.66766209
ENSG00000250909	RP11-843P14.2	176347941	176353584	5	antisense	0	0.861500913	0.032296004	-44.6540519	0.639576712
ENSG00000226155	AC124944.3	195912049	195913986	3	antisense	1	0.860411756	0.032255083	-0.124889109	0.671675768
ENSG00000238260	RP11-46F15.2	3623190	3624743	1	antisense	11	0.854477286	0.032032119	-18.40148873	0.658500995
ENSG00000258768	CTD-2292M16.8	20260480	20264308	14	lincRNA	7	0.854357104	0.032027603	-9.137648257	0.665178878
ENSG00000230155	RP3-477O4.14	35476203	35490982	20	antisense	0	0.852835599	0.031970439	-15.92506208	0.660286139
ENSG00000230316	FEZF1-AS1	122303658	122310077	7	antisense	0	0.851710559	0.03192817	-1.489564578	0.670692035
ENSG00000254461	RP11-755F10.3	66259567	66261834	11	antisense	3	0.850545884	0.031884412	-12.4407514	0.662797821
ENSG00000228192	RP11-342M1.3	42834681	42846422	1	antisense	2	0.849785062	0.031855827	-7.23601048	0.666549683
ENSG00000232412	RP1-315G1.3	123959233	123961341	X	lincRNA	1	0.84964309	0.031850493	-16.51062345	0.659864034
ENSG00000237174	RP11-415D17.3	75357214	75399300	6	antisense	3	0.848916078	0.031823178	-2.004975558	0.670320499
ENSG00000228623	ZNF883	112997120	113050043	9	lincRNA	4	0.846840301	0.031745189	-18.56112486	0.658385921
ENSG00000226939	AC062021.1	139366165	139379147	2	lincRNA	2	0.84568526	0.031701793	-17.76588041	0.658959176
ENSG00000228353	RP11-184A2.2	3767915	3768751	10	antisense	3	0.845604204	0.031698748	-2.745839189	0.669786444
ENSG00000224078	SNHG14	24978583	25419462	15	processed_transcript	5	0.845454451	0.031693121	-24.87936003	0.653831391
ENSG00000225539	AC018799.1	194344269	194419645	2	lincRNA	3	0.84446853	0.031656079	-8.536765913	0.665612027
ENSG00000237786	GFOD1-AS1	13486294	13486852	6	antisense	22	0.842065518	0.031565795	-18.60101585	0.658357165
ENSG00000232019	AC074183.4	84939349	84940245	7	lincRNA	8	0.840598944	0.031510695	-28.10788396	0.651504095
ENSG00000188365	AC092171.2	5419846	5423122	7	antisense	7	0.839524839	0.031470339	-3.207192868	0.669453875
ENSG00000250379	RP11-23P13.4	41825099	41827936	15	antisense	6	0.838454403	0.031430122	-20.11463136	0.657266068
ENSG00000224963	U82695.9	153485856	153487088	X	antisense	1	0.837908842	0.031409625	-4.661991876	0.668405176
ENSG00000223726	CTA-929C8.7	27307483	27318538	22	lincRNA	1	0.837400219	0.031390515	5.22139797	0.675529664
ENSG00000251396	LINC01301	60384588	60516795	8	lincRNA	2	0.836690986	0.031363869	12.26471764	0.680606874
ENSG00000231808	LINC01388	112713	113754	9	lincRNA	1	0.833892824	0.031258739	-3.742079638	0.669068299
ENSG00000226533	BTBD9-AS1	38481692	38482531	6	antisense	4	0.833102064	0.031229029	-9.725694367	0.664754982
ENSG00000257061	RP4-809F18.2	126358034	126358896	12	lincRNA	3	0.828228073	0.031045908	-4.804917609	0.668302147
ENSG00000205488	CALML3-AS1	5514244	5526246	10	antisense	3	0.827866965	0.031032341	0.71329984	0.67227998
ENSG00000228543	GS1-519E5.1	9249920	9275206	X	lincRNA	1	0.827619027	0.031023025	-2.090926761	0.67025854
ENSG00000244036	RP11-306G20.1	129953234	130026989	7	antisense	1	0.827456516	0.03101692	18.70293489	0.685247893
ENSG00000254876	RP11-23J9.5	97238449	97297314	9	processed_transcript	11	0.827444836	0.031016481	-33.28789723	0.647770058
ENSG00000239353	RP11-492E3.51	129501990	129513686	9	lincRNA	4	0.825207559	0.030932424	-18.77569398	0.658231248
ENSG00000259146	RP1-261D10.2	71292729	71321814	14	antisense	1	0.824223726	0.03089546	0.435060277	0.67207941
ENSG00000238198	RP11-31F15.2	113011687	113073105	1	lincRNA	2	0.820331592	0.030749229	-5.02582424	0.668142906
ENSG00000256150	RP11-885B4.1	2742626	2771908	12	lincRNA	3	0.819240261	0.030708226	-12.91956498	0.662452666
ENSG00000224220	AC104699.1	25421117	25427643	2	antisense	1	0.816900899	0.030620334	0.440295276	0.672083184
ENSG00000255949	AP003419.16	67431367	67435399	11	antisense	13	0.815091115	0.030552338	-21.39423159	0.656343662
ENSG00000226872	AC002472.11	21031357	21043969	22	antisense	3	0.812964866	0.030472453	1.731679313	0.673014084
ENSG00000254913	RP4-791M13.5	149006309	149009527	1	antisense	22	0.812011102	0.030436619	-12.92461602	0.662449025
ENSG00000230852	RP11-51G5.1	84023055	84024553	6	lincRNA	3	0.811469139	0.030416257	-6.231538162	0.667273761
ENSG00000231419	LINC00689	159006522	159030195	7	processed_transcript	2	0.810157191	0.030366966	-25.45182917	0.653418724
ENSG00000253807	LINC01170	124059794	124405079	5	lincRNA	1	0.808526292	0.030305691	0.018663746	0.671779249
ENSG00000247708	STX18-AS1	4542131	4710938	4	antisense	1	0.807894285	0.030281946	0.47408593	0.672107542
ENSG00000257522	RP11-562L8.1	29264381	29381295	14	processed_transcript	10	0.807229146	0.030256956	-20.09746891	0.65727844
ENSG00000234929	AC018685.1	2641989	2656630	2	lincRNA	3	0.806238561	0.030219739	-4.61069846	0.668442151
ENSG00000238287	RP11-656D10.3	40493157	40508661	1	antisense	4	0.804349058	0.030148748	-15.95917785	0.660261546
ENSG00000232931	LINC00342	95807118	95816215	2	lincRNA	11	0.803939074	0.030133344	15.56930458	0.682989001
ENSG00000228302	RP11-186N15.3	12244751	12247845	10	antisense	1	0.803779136	0.030127335	-0.399671707	0.67147769
ENSG00000228989	AC133528.2	241690414	241694289	2	antisense	11	0.802134553	0.030065547	-9.189454014	0.665141534
ENSG00000233251	AC007743.1	56173534	56185770	2	antisense	22	0.797805698	0.029902907	-14.43434459	0.66136073
ENSG00000258696	CTD-2058B24.3	38003113	38004847	14	antisense	1	0.796196796	0.029842459	1.567745501	0.672895912
ENSG00000228153	RP11-23I7.1	204663872	204664613	1	lincRNA	4	0.794405548	0.02977516	-3.413141196	0.669305416
ENSG00000232832	LMLN-AS1	198038321	198039234	3	antisense	5	0.794187799	0.029766979	-12.11702813	0.663031178
ENSG00000227039	ITGB2-AS1	44921051	44929678	21	antisense	2	0.792459319	0.029702038	-26.28608078	0.65281735
ENSG00000227543	SPAG5-AS1	28598790	28617377	17	processed_transcript	22	0.791669842	0.029672376	-12.38157691	0.662840477
ENSG00000245148	ARAP1-AS2	72700474	72705607	11	antisense	4	0.791053277	0.029649211	-14.07730145	0.661618106
ENSG00000224729	PCOLCE-AS1	100589402	100604206	7	antisense	9	0.788817441	0.029565209	-4.430980976	0.668571701
ENSG00000223382	RP5-1125N11.2	30824228	30834431	1	lincRNA	2	0.788207758	0.029542302	-20.29528132	0.657135846
ENSG00000225302	RP11-539I5.1	116828761	116850205	10	antisense	12	0.788079392	0.029537479	-10.05138773	0.664520205
ENSG00000254160	CTD-2281E23.3	1246789	1248760	8	lincRNA	1	0.783688885	0.029372523	-8.534166795	0.665613901
ENSG00000239587	AC018730.4	104865407	104867496	2	antisense	8	0.782042611	0.029310671	-62.35580208	0.626816322
ENSG00000244380	RP11-24C3.2	48440352	48446656	3	antisense	12	0.781673457	0.029296801	-15.57606668	0.660537714
ENSG00000231453	LINC01305	174326027	174330643	2	lincRNA	1	0.781037998	0.029272927	-2.168473015	0.670202641
ENSG00000258875	CTD-2547L24.3	91242759	91252211	14	processed_transcript	3	0.778317181	0.029170703	-10.14412029	0.664453358
ENSG00000257808	RP11-1136G11.8	53159586	53161000	12	lincRNA	11	0.7780777	0.029161705	19.46783019	0.685799272
ENSG00000246379	RP11-461O7.1	56092987	56191094	16	lincRNA	1	0.777475341	0.029139074	4.514051461	0.67501977
ENSG00000249906	RP5-1029K10.2	49505657	49574064	17	antisense	1	0.777365895	0.029134962	6.826863576	0.676686972
ENSG00000230732	AC127904.2	196912646	196914579	3	sense_intronic	4	0.777201908	0.029128801	-8.668884673	0.665516789
ENSG00000225339	RP11-513I15.6	34248568	34286768	6	processed_transcript	1	0.776047333	0.029085422	-9.63705233	0.66481888
ENSG00000236065	RP1-117O3.2	32987075	33032469	1	antisense	8	0.775876799	0.029079015	-33.5587685	0.647574799
ENSG00000249532	RP11-148B6.1	112646476	112650051	4	antisense	1	0.773371028	0.02898487	14.82546401	0.6824528
ENSG00000251239	CTB-22K21.2	50627032	50631940	17	antisense	1	0.772251172	0.028942796	0.698248114	0.67226913
ENSG00000255145	STX17-AS1	99886322	99906601	9	antisense	2	0.771552083	0.028916531	-15.98518562	0.660242799
ENSG00000258490	RP11-862P13.1	66969038	66969816	14	antisense	4	0.770687673	0.028884054	-10.54027682	0.664167787
ENSG00000258725	PRC1-AS1	90966345	90988624	15	antisense	6	0.766072004	0.028710638	-98.41124089	0.600825589
ENSG00000230415	RP5-902P8.10	1275223	1280420	1	lincRNA	11	0.765613369	0.028693407	-3.73673094	0.669072155
ENSG00000240875	LINC00886	156747346	156817062	3	lincRNA	2	0.764695178	0.028658909	-19.94156645	0.657390823
ENSG00000235501	RP4-639F20.1	94927566	94963270	1	antisense	2	0.762106367	0.028561645	0.831883621	0.672365462
ENSG00000225216	AC007362.3	205756469	205764006	2	antisense	1	0.760938546	0.028517769	1.715662431	0.673002538
ENSG00000224808	SRGAP3-AS1	9014123	9015979	3	antisense	12	0.760917963	0.028516996	-5.578100348	0.667744795
ENSG00000232807	RP11-536K7.3	5934270	5945900	10	antisense	21	0.760704519	0.028508976	-24.50702339	0.654099792
ENSG00000248245	CTB-49A3.2	133160438	133224413	5	antisense	3	0.760436971	0.028498924	-9.099649333	0.66520627
ENSG00000130600	H19	1995163	2001470	11	processed_transcript	1	0.758388054	0.028421944	-5.757175525	0.667615708
ENSG00000228275	ARMCX3-AS1	101622983	101624164	X	antisense	2	0.757545519	0.028390289	-22.41155679	0.655610319
ENSG00000256364	RP11-173P15.3	120697124	120699541	12	antisense	0	0.756818651	0.02836298	-21.63643849	0.656169066
ENSG00000223528	RP11-223P11.3	126988095	127026507	10	antisense	2	0.752468511	0.028199541	-5.803711131	0.667582162
ENSG00000255595	RP4-809F18.1	126359302	126361065	12	lincRNA	3	0.751061945	0.028146694	-1.90311266	0.670393927
ENSG00000233110	RP11-301L8.2	185587909	185594003	4	antisense	12	0.750207793	0.028114603	-4.509590092	0.668515036
ENSG00000255455	RP11-890B15.3	130866254	130870247	11	lincRNA	5	0.747724045	0.028021286	-8.964484348	0.665303704
ENSG00000225106	RP11-429E11.2	61738219	61755056	20	antisense	1	0.747332172	0.028006563	-2.436881923	0.670009157
ENSG00000254682	RP11-660L16.2	71448674	71452157	11	antisense	5	0.746341365	0.027969337	-21.56565328	0.656220092
ENSG00000259018	RP11-124D2.3	23356406	23357003	14	antisense	3	0.744857892	0.027913602	-15.34936382	0.660701134
ENSG00000234290	AC116366.6	132468890	132473043	5	antisense	11	0.744275491	0.02789172	-34.2966631	0.647042884
ENSG00000237181	AC147651.4	603185	608482	7	antisense	2	0.743885155	0.027877055	-6.244147966	0.667264671
ENSG00000236819	LINC01563	21075556	21090615	17	lincRNA	2	0.743228709	0.027852391	-10.54102162	0.66416725
ENSG00000257096	AE000658.22	21521083	21522660	14	antisense	9	0.742746818	0.027834286	-18.14643774	0.65868485
ENSG00000230438	SERPINB9P1	2854657	2881407	6	lincRNA	10	0.742430551	0.027822404	-28.86294076	0.650959808
ENSG00000250397	RP11-1391J7.1	856880	859795	11	antisense	11	0.741772801	0.027797691	-4.322178865	0.668650132
ENSG00000237807	RP11-400K9.4	53515171	53523931	8	lincRNA	2	0.737758455	0.027646868	2.757990303	0.673753905
ENSG00000235021	RP11-439E19.7	246690047	246691821	1	lincRNA	1	0.737280726	0.027628919	-2.992157007	0.669608884
ENSG00000253868	FER1L6-AS2	124046073	124171522	8	antisense	3	0.736542571	0.027601186	-0.561454433	0.671361068
ENSG00000223642	AC008277.1	159386367	159404636	2	antisense	6	0.736228174	0.027589374	-5.499986838	0.667801103
ENSG00000231170	AC002451.3	95596682	95613719	7	antisense	2	0.736026877	0.027581811	-7.86216549	0.666098316
ENSG00000234789	RP11-483H20.4	129640476	129641282	9	antisense	6	0.73522903	0.027551835	-11.00696164	0.663831375
ENSG00000248202	RP11-455B3.1	97881420	97922695	5	lincRNA	3	0.734398778	0.027520642	-10.1228	0.664468727
ENSG00000251680	CTC-575N7.1	129500361	129905917	5	antisense	1	0.734136706	0.027510795	-2.403177968	0.670033453
ENSG00000248445	SEMA6A-AS1	116447547	116508276	5	antisense	8	0.730673533	0.02738068	-14.52337755	0.66129655
ENSG00000235852	AC005540.3	190880797	190882059	2	antisense	22	0.730314619	0.027367195	-18.92483888	0.658123736
ENSG00000257557	RP11-84G21.1	79934901	79942712	12	antisense	1	0.729901145	0.027351661	4.170654614	0.674772231
ENSG00000244302	PEX5L-AS2	179898229	179921895	3	antisense	5	0.729469684	0.02733545	-6.317711398	0.667211643
ENSG00000240571	RP11-775D22.3	130173718	130205361	7	antisense	1	0.728253673	0.027289763	7.928353181	0.677480986
ENSG00000239523	MYLK-AS1	123585542	123644568	3	antisense	2	0.723710878	0.027119086	-8.660064365	0.665523147
ENSG00000233547	RP11-57H14.2	112950646	112951875	10	antisense	9	0.723296096	0.027103502	-2.948051073	0.669640678
ENSG00000259052	AL157871.2	100279959	100291456	14	sense_overlapping	15	0.723095497	0.027095965	-26.67025538	0.652540416
ENSG00000253746	RP11-527N22.2	37405439	37406724	8	lincRNA	3	0.722007434	0.027055086	-3.352158403	0.669349376
ENSG00000206532	RP11-553A10.1	110888384	110893476	3	lincRNA	7	0.719631323	0.026965813	-10.59474078	0.664128526
ENSG00000254762	RP11-867G23.2	66267635	66268129	11	antisense	4	0.718242301	0.026913625	-25.96742241	0.653047056
ENSG00000226754	RP5-1024G6.5	53238610	53242783	1	antisense	8	0.71776118	0.026895549	-20.5839407	0.656927764
ENSG00000233461	RP11-295G20.2	231522388	231528556	1	antisense	2	0.717309016	0.026878561	-7.053362719	0.666681345
ENSG00000228925	AC016722.4	46899275	46908678	2	antisense	7	0.716372157	0.026843362	-2.838629364	0.669719556
ENSG00000259279	CTD-2033D15.1	39593580	39594231	15	antisense	8	0.716090559	0.026832782	-17.72037077	0.658991982
ENSG00000257545	RP11-144F15.1	106495958	106774918	12	antisense	1	0.715725571	0.026819069	0.399403973	0.672053707
ENSG00000253661	ZFHX4-AS1	76491200	76683278	8	antisense	2	0.715327836	0.026804126	-3.249057146	0.669423697
ENSG00000250033	SLC7A11-AS1	138057464	138178177	4	processed_transcript	2	0.714735971	0.026781889	4.413738549	0.674947459
ENSG00000250446	LINC01332	74327995	74334766	5	lincRNA	3	0.714225749	0.026762719	-6.571903645	0.667028407
ENSG00000229672	RP11-184A2.3	3751067	3763226	10	antisense	3	0.713743496	0.026744601	-4.368446953	0.668616779
ENSG00000241357	RP11-758P17.2	100435257	100436510	7	antisense	13	0.71341834	0.026732384	-17.03707814	0.659484537
ENSG00000246067	RAB30-AS1	83072066	83106719	11	lincRNA	1	0.71272885	0.026706479	-13.96302498	0.661700483
ENSG00000188185	LINC00265	39733632	39793092	7	lincRNA	15	0.712171319	0.026685532	-18.31214831	0.658565397
ENSG00000235151	AC114730.2	241844380	241845036	2	lincRNA	1	0.705594254	0.026438425	4.707272346	0.675159054
ENSG00000258727	RP11-66N24.3	23561097	23568073	14	antisense	11	0.704852516	0.026410557	25.23604892	0.689957319
ENSG00000232533	AC093673.5	143379692	143380495	7	antisense	1	0.702007551	0.026303669	-2.249892863	0.670143949
ENSG00000227751	RP1-20B21.4	17406760	17407382	1	antisense	9	0.702004712	0.026303562	-19.97158705	0.657369182
ENSG00000257809	RP11-603J24.14	56150796	56158220	12	antisense	5	0.701908775	0.026299958	-0.968438878	0.671067691
ENSG00000231485	RP4-535B20.1	65066627	65067737	1	lincRNA	4	0.700904786	0.026262237	-8.618446976	0.665553147
ENSG00000203644	RP11-332M2.1	129847048	129847957	3	sense_intronic	5	0.698854941	0.026185222	-17.44298386	0.659191938
ENSG00000257342	RP11-571M6.7	57694132	57721510	12	antisense	8	0.698844815	0.026184841	-12.60816933	0.662677137
ENSG00000226476	RP11-776H12.1	60515716	60640491	1	lincRNA	3	0.696428511	0.026094058	-8.415617272	0.665699358
ENSG00000258843	RP11-286O18.1	50821880	50823501	14	antisense	6	0.689840177	0.025846527	-6.828822168	0.666843206
ENSG00000257056	RP11-966I7.2	28783491	28785787	14	lincRNA	1	0.689628923	0.02583859	3.72605035	0.674451736
ENSG00000232284	GNG12-AS1	67832303	68202987	1	antisense	2	0.686994596	0.025739616	-3.26057688	0.669415393
ENSG00000238058	RP11-432J22.2	135907812	135913513	9	antisense	2	0.686776583	0.025731425	-12.19568495	0.662974478
ENSG00000250007	RP11-814P5.1	34755084	34812923	15	antisense	3	0.685978296	0.025701432	-4.600398782	0.668449576
ENSG00000224945	RP11-82L18.2	89088604	89109934	9	sense_intronic	1	0.685423754	0.025680598	-4.870074147	0.668255179
ENSG00000225764	P3H2-AS1	190120964	190144846	3	antisense	3	0.684231013	0.025635785	-10.12239324	0.66446902
ENSG00000226576	RP11-523O18.1	48984564	49018897	10	antisense	10	0.683325404	0.025601761	-23.25036842	0.655005657
ENSG00000256124	LINC01152	72030291	72041297	17	lincRNA	2	0.679077356	0.025442157	7.882793407	0.677448144
ENSG00000236854	AL121656.5	32927127	32928405	2	lincRNA	10	0.677060236	0.025366371	-18.66099979	0.658313925
ENSG00000255036	RP11-23J9.4	97238497	97377287	9	processed_transcript	11	0.674926843	0.025286218	2.078465307	0.673264066
ENSG00000228701	TNKS2-AS1	91782839	91798291	10	antisense	2	0.673729488	0.025241232	-3.738631251	0.669070785
ENSG00000240449	RP4-584D14.5	150363777	150372590	7	antisense	8	0.672674867	0.025201609	-13.5352395	0.662008854
ENSG00000254361	RP11-238K6.2	137852327	137929044	8	lincRNA	8	0.671747612	0.025166771	-19.60340415	0.657634589
ENSG00000257653	RP11-579D7.2	48766194	48767323	12	antisense	11	0.668134881	0.025031036	-1.166121262	0.670925191
ENSG00000225975	LINC01534	36685440	36687449	19	lincRNA	7	0.667517557	0.025007843	-9.952951234	0.664591163
ENSG00000251148	RP11-478C1.7	2295584	2319089	4	antisense	4	0.667045974	0.024990125	-6.737420416	0.666909094
ENSG00000257622	RP11-44N21.4	105152194	105181194	14	processed_transcript	17	0.664776024	0.024904841	-14.26495247	0.661482837
ENSG00000257452	RP1-71H24.1	112907628	113017751	12	antisense	2	0.664595981	0.024898076	-5.377721625	0.667889239
ENSG00000232287	SLC6A1-AS1	11006098	11019224	3	antisense	10	0.660674504	0.024750742	-27.00860392	0.652296516
ENSG00000238099	LINC01625	139468995	139474596	6	lincRNA	2	0.658625162	0.024673746	2.202284572	0.673353322
ENSG00000241772	AC092620.2	138569090	138574458	2	3prime_overlapping_ncrna	7	0.658280555	0.024660799	-7.273894576	0.666522374
ENSG00000248197	LINC00290	181064089	181159149	4	lincRNA	8	0.654419572	0.024515738	-25.30667385	0.65352336
ENSG00000227198	C6orf47-AS1	31658329	31660721	6	antisense	7	0.652087756	0.024428129	-16.39171218	0.659949752
ENSG00000250619	CTD-2215L10.1	9001774	9045940	5	antisense	9	0.651662567	0.024412154	-0.47218826	0.671425416
ENSG00000221990	EXOC3-AS1	441498	443160	5	antisense	2	0.649962884	0.024348295	-20.78237942	0.656784719
ENSG00000253641	LINCR-0001	10474565	10481974	8	lincRNA	6	0.649731222	0.024339591	-7.524798459	0.666341509
ENSG00000254847	RP11-51B23.3	12538083	12540967	11	lincRNA	10	0.647938672	0.024272243	-21.67231315	0.656143206
ENSG00000237054	PRMT5-AS1	22918947	22926900	14	antisense	5	0.647589144	0.024259111	-7.647042737	0.666253388
ENSG00000218537	MIF-AS1	23894426	23898930	22	antisense	13	0.646278997	0.024209888	0.265336051	0.671957064
ENSG00000228021	RP11-383C5.3	125683229	125709677	10	processed_transcript	2	0.642657569	0.024073827	-27.08670384	0.652240217
ENSG00000234056	LINC00463	25172828	25180079	13	lincRNA	2	0.640297381	0.023985152	-14.99198516	0.660958752
ENSG00000234771	SLC25A25-AS1	128108581	128118693	9	antisense	11	0.636941729	0.023859076	26.19107573	0.690645755
ENSG00000254422	RP11-864G5.3	102229851	102230922	11	antisense	9	0.634224272	0.023756979	13.85564023	0.681753698
ENSG00000224023	FLJ37035	125700436	125719566	10	lincRNA	10	0.633395257	0.023725832	-26.45686858	0.652694237
ENSG00000237941	KCNQ1DN	2870033	2872105	11	antisense	1	0.631341072	0.023648654	-0.352205173	0.671511906
ENSG00000233766	AC098617.1	191846539	192044525	2	antisense	2	0.629634993	0.023584555	14.29776039	0.682072403
ENSG00000226849	RP4-635E18.7	11068471	11073097	1	antisense	15	0.622135675	0.023302797	-19.98231238	0.657361451
ENSG00000226363	HAGLROS	176177717	176179008	2	lincRNA	10	0.621666437	0.023285168	-15.08028614	0.6608951
ENSG00000242686	RP11-1191J2.2	652850	656213	4	antisense	11	0.621296432	0.023271266	2.991326263	0.673922106
ENSG00000234166	ARHGEF19-AS1	16197854	16198357	1	antisense	9	0.620724856	0.023249791	-25.30537248	0.653524298
ENSG00000234281	LANCL1-AS1	210324759	210469246	2	antisense	3	0.620513898	0.023241865	-7.755041581	0.666175537
ENSG00000240219	RP11-430C7.5	204626775	204629712	1	lincRNA	4	0.620059005	0.023224775	-5.363303702	0.667899632
ENSG00000232618	RP11-439L18.1	142950211	142956646	6	lincRNA	1	0.619893806	0.023218568	2.023281959	0.673224287
ENSG00000226490	AC138647.1	141514638	141518737	8	lincRNA	1	0.616683742	0.023097962	5.103372215	0.675444585
ENSG00000189238	LINC00943	126726270	126746252	12	lincRNA	2	0.616460272	0.023089566	1.592655063	0.672913868
ENSG00000224888	RP5-1142A6.2	88731180	88741425	16	antisense	4	0.615180002	0.023041465	-14.97054081	0.66097421
ENSG00000257550	RP11-793H13.3	53513984	53517608	12	antisense	15	0.614394246	0.023011944	-16.09845179	0.66016115
ENSG00000238276	RP11-245J24.1	118241564	118267710	10	processed_transcript	2	0.610388066	0.022861427	-8.967753168	0.665301348
ENSG00000248468	RP11-517B11.4	131517831	131520880	3	antisense	2	0.607546174	0.022754654	-17.42716977	0.659203338
ENSG00000231062	AC103563.9	95051395	95053176	2	antisense	10	0.607125633	0.022738854	-12.94203495	0.662436468
ENSG00000224975	INE1	47204921	47205865	X	sense_intronic	11	0.606953584	0.02273239	10.94985036	0.679659046
ENSG00000231851	UTAT33	105097052	105102944	2	antisense	1	0.606288476	0.022707401	0.175779977	0.671892507
ENSG00000250186	RP11-1079K10.4	49404081	49405197	17	antisense	13	0.603961782	0.022619985	-7.072155734	0.666667798
ENSG00000236078	LINC01447	47621939	47629893	7	lincRNA	1	0.603817034	0.022614546	-19.48827833	0.657717578
ENSG00000225559	AC083867.4	138163440	138164637	7	lincRNA	1	0.602229151	0.022554888	10.21931689	0.679132437
ENSG00000229214	LINC00242	169788790	169798825	6	lincRNA	1	0.599379956	0.022447841	-0.108872632	0.671687314
ENSG00000251372	LINC00499	138309711	138424344	4	lincRNA	2	0.597774997	0.022387541	-18.09523862	0.658721757
ENSG00000224738	AC099850.1	59106598	59118267	17	antisense	1	0.597012661	0.022358899	-6.482135145	0.667093117
ENSG00000183308	AC005037.3	200963263	201009102	2	antisense	12	0.595601426	0.022305877	-7.697403131	0.666217086
ENSG00000232645	LINC01431	23356594	23358116	20	lincRNA	4	0.59546807	0.022300867	-11.61044637	0.66339635
ENSG00000241570	PAQR9-AS1	142960650	143001559	3	antisense	3	0.595152715	0.022289019	-10.77378947	0.663999458
ENSG00000240687	RP11-521D12.1	9638772	9649439	2	lincRNA	10	0.594759145	0.022274232	-12.20764663	0.662965855
ENSG00000231890	DARS-AS1	135985176	136022593	2	antisense	1	0.592641145	0.022194656	3.76228625	0.674477857
ENSG00000236915	RP4-651E10.4	86571181	86693203	1	antisense	1	0.592491033	0.022189017	-11.96196118	0.663142959
ENSG00000249249	AC010226.4	115602057	115620659	5	antisense	4	0.590851113	0.022127403	-7.263919865	0.666529564
ENSG00000239569	KMT2E-AS1	105013425	105014321	7	antisense	8	0.590768906	0.022124314	-15.41952374	0.660650559
ENSG00000225472	RP11-120J1.1	14317085	14357908	9	antisense	3	0.59041938	0.022111182	-10.34185969	0.664310817
ENSG00000226029	RP4-798A10.2	16460948	16468481	1	lincRNA	11	0.589190584	0.022065015	24.46788868	0.689403587
ENSG00000254563	RP11-673F18.1	78749250	78756480	11	antisense	2	0.589158064	0.022063793	-0.03734109	0.671738877
ENSG00000163009	C2orf48	10141382	10211725	2	lincRNA	0	0.588631802	0.022044021	-71.95903586	0.619893786
ENSG00000253973	RP11-467K18.2	9004162	9065154	11	antisense	3	0.585903724	0.021941524	-5.594621359	0.667732886
ENSG00000224101	ELMO1-AS1	36997796	37013630	7	antisense	10	0.585478496	0.021925548	-9.985819904	0.66456747
ENSG00000170919	TPT1-AS1	45341345	45393413	13	antisense	9	0.585259012	0.021917302	-30.54528964	0.649747079
ENSG00000233304	LINC01346	3940565	3955262	1	lincRNA	3	0.582650479	0.021819296	-13.55991022	0.66199107
ENSG00000227946	AC007383.3	206084605	206086564	2	lincRNA	4	0.582470187	0.021812523	-10.02918874	0.664536207
ENSG00000236953	ZDHHC20-IT1	21376977	21377874	13	sense_intronic	4	0.581602951	0.02177994	-4.539539625	0.668493446
ENSG00000236276	NDP-AS1	43949732	43969620	X	antisense	2	0.581083022	0.021760405	0.694276001	0.672266267
ENSG00000256943	RP13-895J2.2	132275391	132278329	12	antisense	3	0.580892259	0.021753238	-10.9054714	0.663904535
ENSG00000233230	AC079807.2	47905678	47907810	2	antisense	1	0.58029393	0.021730758	1.304188408	0.672705925
ENSG00000253174	RP11-360L9.7	41540381	41545044	8	antisense	9	0.579976608	0.021718836	-65.3855445	0.624632318
ENSG00000253445	CTB-79E8.2	172690454	172697720	5	antisense	1	0.57845483	0.021661661	-2.350542533	0.670071395
ENSG00000229692	SOS1-IT1	38992279	38993857	2	sense_intronic	1	0.578433185	0.021660848	3.256883438	0.674113535
ENSG00000215769	RP13-104F24.2	64749663	64781707	17	processed_transcript	11	0.574975454	0.021530938	7.690539408	0.677309556
ENSG00000254902	ANO1-AS1	70187788	70188509	11	antisense	2	0.574417343	0.021509969	-8.284634078	0.665793777
ENSG00000257886	RP11-61E11.1	105072486	105074021	12	antisense	1	0.573381434	0.021471049	2.684327961	0.673700805
ENSG00000231864	RP11-229P13.23	137063535	137064581	9	antisense	2	0.573046753	0.021458474	-8.207646159	0.665849275
ENSG00000257319	RP11-478B9.1	45050901	45103107	12	antisense	2	0.572917506	0.021453618	2.482223278	0.673555117
ENSG00000235890	TSPEAR-AS1	44506807	44516575	21	antisense	1	0.571873541	0.021414395	-1.570147038	0.670633947
ENSG00000228692	RP5-826L7.1	163586583	163588165	6	lincRNA	2	0.568715193	0.021295733	-9.768971753	0.664723786
ENSG00000257647	RP11-701H24.3	25027736	25032047	15	lincRNA	5	0.567714379	0.021258131	-2.49385882	0.669968085
ENSG00000250208	FZD10-AS1	130144315	130162256	12	processed_transcript	2	0.566872246	0.021226491	-3.468610274	0.669265431
ENSG00000258782	RP11-701B16.2	59479274	59525437	14	processed_transcript	1	0.565953623	0.021191978	-3.543080826	0.669211748
ENSG00000226994	AC012593.1	34799850	35185689	2	lincRNA	10	0.56384888	0.0211129	-16.22579963	0.660069351
ENSG00000246451	RP11-894P9.1	103682362	103684015	14	antisense	11	0.563541155	0.021101339	23.66390541	0.688824032
ENSG00000253133	RP11-360L9.4	41534155	41578368	8	antisense	1	0.563213617	0.021089033	-4.885651207	0.66824395
ENSG00000224818	RP11-134G8.10	201464383	201465146	1	3prime_overlapping_ncrna	1	0.562545507	0.021063931	1.268582517	0.672680259
ENSG00000203993	ARRDC1-AS1	137615332	137618906	9	antisense	11	0.562209396	0.021051303	-21.20523369	0.656479902
ENSG00000234936	AC010883.5	43229573	43233394	2	antisense	5	0.561937521	0.021041089	-17.58274122	0.659091193
ENSG00000232377	AC016910.1	143937073	143964156	2	antisense	7	0.561068357	0.021008433	-8.968927627	0.665300501
ENSG00000241202	ZIC4-AS1	147386967	147387453	3	antisense	2	0.559805126	0.020960972	-9.775038042	0.664719413
ENSG00000258926	RP11-47I22.1	61537508	61545287	14	antisense	1	0.558823104	0.020924077	-6.435437954	0.667126779
ENSG00000227591	RP1-28O10.1	209661364	209724125	1	antisense	4	0.558783267	0.02092258	-19.80545331	0.657488941
ENSG00000227811	FAM212B-AS1	111739841	111747798	1	antisense	2	0.558583366	0.020915069	-8.938209524	0.665322644
ENSG00000251031	CTC-367F4.1	145222610	145228982	5	lincRNA	3	0.55759588	0.020877969	-5.078117336	0.66810521
ENSG00000248925	CTD-2083E4.6	269858	271516	5	antisense	25	0.557576112	0.020877226	-24.38266766	0.654189434
ENSG00000254635	WAC-AS1	28522652	28532743	10	antisense	1	0.557456726	0.02087274	-6.87867827	0.666807267
ENSG00000251615	RP11-774O3.3	8355090	8358338	4	lincRNA	6	0.556416761	0.020833668	-2.678682461	0.669834854
ENSG00000227579	RP1-35C21.2	177393287	177597709	1	lincRNA	3	0.555521274	0.020800023	-7.36626036	0.666455791
ENSG00000224568	AC096669.3	107529487	107556326	2	lincRNA	1	0.554830686	0.020774077	-8.878460555	0.665365715
ENSG00000232183	RP6-27P15.2	138627077	138627343	X	antisense	18	0.554772434	0.020771889	-12.61688932	0.662670851
ENSG00000247735	CTD-2574D22.2	29926836	29928933	16	antisense	8	0.554704375	0.020769332	-16.34770569	0.659981474
ENSG00000227987	AC092675.4	98346995	98351140	2	sense_intronic	1	0.554606658	0.02076566	5.532814869	0.67575415
ENSG00000224424	PRKAR2A-AS1	48847572	48851981	3	antisense	10	0.55440207	0.020757974	-16.98880492	0.659519335
ENSG00000258559	AC005519.4	74289127	74294425	14	sense_overlapping	11	0.55439721	0.020757791	21.13717826	0.687002629
ENSG00000228172	RP1-317E23.3	25816749	25820797	1	antisense	9	0.545240806	0.020413775	-15.68826604	0.660456835
ENSG00000256542	RP13-895J2.3	132277349	132280900	12	antisense	3	0.545056891	0.020406865	-10.74182054	0.664022503
ENSG00000236106	AC010729.2	5726449	5730342	2	lincRNA	1	0.544350123	0.020380311	-12.43901097	0.662799075
ENSG00000254338	MAFA-AS1	143417679	143419150	8	antisense	1	0.540801367	0.020246981	1.53574595	0.672872845
ENSG00000227619	RP11-492E3.2	129575409	129584556	9	antisense	1	0.539168194	0.020185621	-26.15422778	0.652912397
ENSG00000254042	CTC-558O2.1	168706567	168720884	5	antisense	5	0.539017656	0.020179965	-11.98308418	0.663127732
ENSG00000225331	AP001055.6	44158740	44160076	21	lincRNA	4	0.537439491	0.020120672	4.149298116	0.674756836
ENSG00000229848	RP13-766D20.2	81514047	81527776	17	antisense	8	0.53708323	0.020107286	-9.978325239	0.664572872
ENSG00000234775	RP11-335O13.7	203127259	203127954	1	antisense	18	0.536331841	0.020079056	-11.11945445	0.663750284
ENSG00000225706	PTPRD-AS1	8858130	8862255	9	lincRNA	1	0.535768559	0.020057893	1.019944737	0.672501027
ENSG00000228541	AC093159.1	62463127	62464070	2	lincRNA	2	0.534386732	0.020005976	-11.83886726	0.663231692
ENSG00000250734	RP11-404E16.1	151612038	151613363	1	antisense	8	0.533687172	0.019979693	-12.03583988	0.663089703
ENSG00000251602	RP11-521B24.3	105416884	105419739	14	antisense	6	0.533655689	0.01997851	-10.8426355	0.66394983
ENSG00000233864	TTTY15	12662334	12692233	Y	lincRNA	0	0.533237057	0.019962782	0.926350471	0.672433559
ENSG00000223776	LGALS8-AS1	236523052	236524508	1	antisense	1	0.532760754	0.019944886	-1.043922379	0.671013278
ENSG00000229325	ACAP2-IT1	195280723	195282741	3	sense_intronic	7	0.528017789	0.019766688	-1.387181792	0.670765838
ENSG00000253829	RP11-723D22.3	38844866	38846439	8	antisense	1	0.527590039	0.019750617	-4.974789979	0.668179694
ENSG00000257038	RP11-800A3.7	73307235	73309361	11	antisense	9	0.525639301	0.019677326	-5.499533922	0.66780143
ENSG00000255468	RP11-867G23.8	66347950	66364804	11	antisense	8	0.524258936	0.019625464	-11.86876829	0.663210137
ENSG00000253106	RP11-158K1.3	124488510	124491643	8	antisense	1	0.523945993	0.019613706	1.252526702	0.672668685
ENSG00000241525	AC108004.3	404468	414023	17	antisense	3	0.523211975	0.019586129	1.275391959	0.672685167
ENSG00000248008	NRAV	120490328	120495940	12	antisense	3	0.519721841	0.019455001	0.53999029	0.672155049
ENSG00000257663	RP11-1100L3.7	52076841	52082084	12	antisense	19	0.519450694	0.019444813	-32.68091476	0.648207604
ENSG00000250046	RP11-148B6.2	112693047	112706810	4	lincRNA	1	0.519400341	0.019442922	6.186193421	0.676225141
ENSG00000237594	AP000251.3	31559245	31560487	21	antisense	1	0.518936897	0.019425509	1.067585528	0.672535369
ENSG00000249572	CTD-2203K17.1	33424025	33440619	5	antisense	1	0.518308382	0.019401895	8.79579639	0.678106286
ENSG00000254528	RP11-728F11.4	117833719	117838942	11	antisense	1	0.516767239	0.019343993	-9.929389417	0.664608148
ENSG00000230156	LINC00443	106653916	106672163	13	lincRNA	8	0.512120331	0.019169404	-20.41078032	0.657052588
ENSG00000256422	RP11-886D15.1	104445868	104609321	11	lincRNA	1	0.511307668	0.019138871	-10.10523551	0.664481388
ENSG00000178803	ADORA2A-AS1	24429206	24495074	22	antisense	9	0.509513716	0.01907147	-2.795781052	0.669750443
ENSG00000206573	THUMPD3-AS1	9349689	9398579	3	antisense	5	0.508828235	0.019045716	-13.53682561	0.66200771
ENSG00000226312	CFLAR-AS1	201140278	201157823	2	antisense	2	0.507191393	0.018984218	-6.649528973	0.666972451
ENSG00000254003	CTB-167B5.1	88216660	88219226	7	antisense	2	0.507110154	0.018981166	-4.557900282	0.668480211
ENSG00000234072	AC074117.10	27356246	27367622	2	antisense	6	0.506849863	0.018971387	-15.08607123	0.660890929
ENSG00000245060	LINC00847	180830957	180835726	5	lincRNA	2	0.506594012	0.018961774	-3.341037153	0.669357393
ENSG00000240889	NDUFB2-AS1	140695336	140697077	7	antisense	14	0.505980537	0.018938725	-14.41786859	0.661372606
ENSG00000241135	LINC00881	157089881	157101135	3	lincRNA	1	0.505890654	0.018935348	-9.954561253	0.664590003
ENSG00000240731	RP5-890O3.9	1317581	1318689	1	sense_intronic	11	0.505553073	0.018922665	12.71038483	0.680928136
ENSG00000228427	RP5-1091N2.9	71183559	71198175	X	antisense	3	0.504911702	0.018898568	-9.09399156	0.665210348
ENSG00000228065	LINC01515	65570338	65768835	10	lincRNA	0	0.502207375	0.018796963	-54.65286665	0.632369019
ENSG00000236823	RP1-249F5.3	159899186	159902510	6	lincRNA	3	0.50094999	0.018749722	-4.410392345	0.668586543
ENSG00000205663	RP11-706O15.5	3891438	3920746	X	lincRNA	1	0.500782976	0.018743447	8.551448867	0.677930147
ENSG00000196295	AC005154.6	30516309	30594809	7	processed_transcript	11	0.499580832	0.018698281	13.09950725	0.681208636
ENSG00000245261	RP3-330M21.5	43213801	43223860	6	antisense	11	0.499142099	0.018681798	-10.80144347	0.663979524
ENSG00000237457	LINC01351	190478551	190480735	1	lincRNA	25	0.498355506	0.018652245	-17.84589764	0.658901496
ENSG00000250686	RP1-240B8.3	61630233	61681049	6	3prime_overlapping_ncrna	1	0.496703825	0.018590189	-5.422469654	0.667856982
ENSG00000215014	RP5-832C2.5	1574975	1577075	1	lincRNA	3	0.495534758	0.018546266	-1.333248646	0.670804716
ENSG00000245311	ARNTL2-AS1	27389789	27446625	12	antisense	7	0.494697472	0.018514808	-1.469179051	0.67070673
ENSG00000250863	RP11-663P9.1	43980006	43981620	4	lincRNA	2	0.493609045	0.018473915	-4.047162747	0.668848379
ENSG00000230387	RP4-737E23.2	23187961	23190307	20	lincRNA	1	0.492117444	0.018417874	0.274371381	0.671963577
ENSG00000225484	NUTM2B-AS1	79663088	79826594	10	antisense	1	0.491819172	0.018406668	6.506452575	0.676456002
ENSG00000230461	PROX1-AS1	213817751	213988508	1	processed_transcript	10	0.491524054	0.01839558	-11.06734111	0.66378785
ENSG00000256538	RP11-847H18.3	34037438	34056740	12	lincRNA	3	0.490690881	0.018364277	-3.598685296	0.669171666
ENSG00000229385	AC010975.1	79493716	79500844	2	antisense	1	0.488984188	0.018300154	0.070388672	0.671816535
ENSG00000226438	RP11-420K8.1	39249838	39257649	1	antisense	0	0.488179934	0.018269938	-8.321609781	0.665767123
ENSG00000228242	AC093495.4	14144637	14165978	3	antisense	4	0.484309455	0.01812452	-17.87640028	0.658879508
ENSG00000255182	CTD-2517M22.14	144495458	144505444	8	processed_transcript	17	0.483728994	0.018102711	-13.85264741	0.661780049
ENSG00000245849	RAD51-AS1	40686724	40695107	15	processed_transcript	11	0.483082498	0.018078422	3.206832334	0.674077455
ENSG00000229111	MED4-AS1	48077137	48079991	13	antisense	4	0.481132477	0.018005157	-9.847716453	0.664667022
ENSG00000259049	RP11-589M4.1	52775237	52777740	14	antisense	4	0.479723429	0.017952218	-3.521122208	0.669227577
ENSG00000225756	DBH-AS1	133654586	133657313	9	antisense	11	0.477597124	0.01787233	-3.588912888	0.66917871
ENSG00000251675	CTC-458I2.2	80128361	80143883	5	antisense	6	0.477046277	0.017851634	-6.988865013	0.666727839
ENSG00000225213	RP11-197M22.2	16721352	16748377	10	sense_intronic	3	0.476772571	0.017841351	-1.842009772	0.670437973
ENSG00000225075	RP11-426L16.3	112693688	112696621	1	antisense	9	0.475805099	0.017805002	-9.781482676	0.664714767
ENSG00000249335	CTC-340D7.1	68832585	68962158	5	lincRNA	3	0.475666492	0.017799794	-2.514176125	0.669953439
ENSG00000230641	USP12-AS2	27172259	27182998	13	antisense	1	0.475461166	0.01779208	5.099693828	0.675441933
ENSG00000254377	MIR124-2HG	64373328	64383787	8	lincRNA	1	0.475413634	0.017790294	-3.799937678	0.669026592
ENSG00000250385	RP11-310P5.2	524705	526594	5	antisense	0	0.475325003	0.017786964	-14.54047695	0.661284224
ENSG00000233849	AC022201.5	70301451	70302072	2	antisense	1	0.47344141	0.017716196	-1.523768713	0.670667379
ENSG00000241720	RP4-735C1.4	109725820	109775252	1	antisense	2	0.469072565	0.017552053	-10.26097992	0.664369119
ENSG00000203288	RP11-98D18.9	151790804	151794402	1	antisense	5	0.468611835	0.017534743	-13.529498	0.662012993
ENSG00000227848	SUCLA2-AS1	48001389	48002552	13	antisense	1	0.468078566	0.017514708	-1.356991911	0.670787601
ENSG00000240211	RP11-758P17.3	100436204	100438504	7	antisense	5	0.467256216	0.017483811	-15.18434688	0.660820087
ENSG00000240143	RP4-753P9.3	129794994	129796963	X	3prime_overlapping_ncrna	2	0.466899201	0.017470398	-0.19614692	0.671624401
ENSG00000229356	LRRC3-AS1	44450986	44455284	21	antisense	1	0.46650469	0.017455576	-3.100955754	0.669530456
ENSG00000237883	DGUOK-AS1	73947642	73981441	2	antisense	5	0.465765763	0.017427813	-3.1637307	0.669485205
ENSG00000232224	LINC00202-1	26931206	26942001	10	lincRNA	4	0.465479831	0.017417071	-28.62407643	0.651131995
ENSG00000218672	AC008060.7	155382076	155396356	7	lincRNA	1	0.464731257	0.017388946	-12.90986777	0.662459656
ENSG00000219665	CTD-2006C1.2	11987617	12046275	19	processed_transcript	5	0.463957542	0.017359877	-9.049321442	0.665242549
ENSG00000255723	RP11-529H2.2	87317170	87345210	4	processed_transcript	16	0.463666229	0.017348932	-13.25817697	0.662208576
ENSG00000258651	RP11-545M17.1	39103140	39103812	14	lincRNA	1	0.463087921	0.017327204	3.115433455	0.67401157
ENSG00000241770	RP11-555M1.3	157163452	157169133	3	antisense	22	0.463057003	0.017326042	-7.281979359	0.666516546
ENSG00000224376	AC017104.6	231388976	231394991	2	processed_transcript	8	0.462064377	0.017288748	-13.93502161	0.661720669
ENSG00000229893	AC004549.6	27733064	27740395	7	antisense	1	0.460435717	0.017227558	-0.142096109	0.671663364
ENSG00000244161	FLNB-AS1	58162547	58170636	3	antisense	11	0.458575957	0.017157685	-10.86133603	0.66393635
ENSG00000239801	DENND6A-AS1	57628810	57654918	3	antisense	6	0.458034912	0.017137357	-11.81451097	0.663249249
ENSG00000248927	CTD-2334D19.1	120781218	120790778	5	lincRNA	7	0.457504978	0.017117447	-2.614102176	0.669881407
ENSG00000223799	IL10RB-AS1	33263873	33266260	21	antisense	11	0.457137085	0.017103625	-16.30522543	0.660012096
ENSG00000232581	AC079742.4	6578565	6588974	7	antisense	14	0.456814268	0.017091496	-13.84858461	0.661782978
ENSG00000258931	RP11-1084I9.2	26050538	26052276	15	lincRNA	3	0.45425235	0.016995242	-5.121337117	0.668074055
ENSG00000233593	RP4-665J23.1	90782983	90851657	1	lincRNA	8	0.45224598	0.016919861	-21.01897218	0.65661417
ENSG00000251161	RP11-540O11.1	40906811	40910337	15	lincRNA	1	0.451424623	0.016889001	-1.415377628	0.670745513
ENSG00000235904	RBMS3-AS3	29264194	29290726	3	antisense	2	0.45132813	0.016885376	-3.013013792	0.66959385
ENSG00000224152	AC009506.1	159615296	159617082	2	antisense	2	0.450437237	0.016851904	-6.310388625	0.667216922
ENSG00000232675	RP4-718D20.3	19693209	19697576	20	processed_transcript	0	0.449311407	0.016809606	-5.704831165	0.66765344
ENSG00000226031	FGF13-AS1	138711452	138716617	X	antisense	18	0.449308305	0.016809489	-7.881058061	0.666084697
ENSG00000244952	RP11-1000B6.5	32613733	32615111	15	lincRNA	2	0.44896231	0.01679649	-8.838874349	0.665394251
ENSG00000203930	LINC00632	140709767	140772679	X	lincRNA	11	0.448588659	0.016782451	-8.217896039	0.665841886
ENSG00000235475	LINC01372	67335976	67340024	7	lincRNA	4	0.448291912	0.016771302	-14.23595606	0.661503739
ENSG00000257585	LINC00609	36070427	36165288	14	lincRNA	1	0.447976877	0.016759466	-8.007563045	0.665993505
ENSG00000247993	FOXD1-AS1	73446357	73446984	5	lincRNA	2	0.447018885	0.016723473	4.146546397	0.674754852
ENSG00000253633	KB-1980E6.3	102528740	102538668	8	lincRNA	1	0.44509019	0.01665101	-2.202327376	0.670178237
ENSG00000259366	CTD-2647L4.4	29055935	29056685	8	sense_intronic	0	0.443122009	0.016577063	-8.780450586	0.665436366
ENSG00000253854	RP11-10N23.2	93719574	93721167	8	antisense	6	0.442758236	0.016563396	-0.185859975	0.671631817
ENSG00000257711	RP11-482D24.2	106680758	106684700	12	antisense	9	0.441827426	0.016528425	-13.43375111	0.662082012
ENSG00000254559	RP11-304M2.5	203623	205470	11	antisense	1	0.441616417	0.016520497	-19.08395957	0.658009033
ENSG00000257410	RP11-2H8.2	71793855	71799627	12	lincRNA	5	0.441167186	0.016503619	-9.1297567	0.665184567
ENSG00000236199	RP11-264I13.2	2041900	2046023	9	antisense	1	0.440122103	0.016464354	1.224879947	0.672648755
ENSG00000229591	RP5-981O7.2	152120001	152121717	7	antisense	3	0.438531438	0.016404591	-0.128917203	0.671672864
ENSG00000225163	LINC00618	96943579	96945394	14	lincRNA	0	0.43797458	0.016383669	-16.47568307	0.659889221
ENSG00000237037	NDUFA6-AS1	42090931	42137742	22	processed_transcript	6	0.436338694	0.016322207	-8.466592329	0.665662612
ENSG00000256824	RP11-21A7A.2	64035970	64103653	11	antisense	22	0.435358411	0.016285377	-6.535675472	0.667054522
ENSG00000233542	RP11-547D24.1	2013213	2015530	1	antisense	3	0.432813041	0.016189745	-10.6995932	0.664052943
ENSG00000255557	RP11-770G2.2	65745729	65771585	11	lincRNA	4	0.431567843	0.016142961	-14.10946514	0.661594921
ENSG00000228824	MIR4500HG	87427214	87671259	13	lincRNA	18	0.43084926	0.016115963	-3.328542636	0.669366399
ENSG00000231724	RP11-573D15.3	186807692	186818121	3	antisense	1	0.430682172	0.016109686	-0.613833498	0.67132331
ENSG00000243620	RP11-649A16.1	146909685	147370656	3	antisense	0	0.430407893	0.016099381	-4.200093263	0.668738138
ENSG00000205959	RP11-689P11.2	8482270	8512610	4	lincRNA	11	0.428937844	0.016044149	16.84369719	0.683907653
ENSG00000235706	DICER1-AS1	95157645	95179933	14	antisense	11	0.421162408	0.015752018	2.645086566	0.673672518
ENSG00000237259	RP4-568F9.3	18313765	18315111	20	antisense	6	0.420301835	0.015719685	-6.837605192	0.666836875
ENSG00000257359	RP11-780K2.1	113932569	113937255	12	antisense	6	0.419599748	0.015693307	-1.444161061	0.670724765
ENSG00000226445	XXyac-YX65C7_A.2	169213254	169239565	6	antisense	1	0.418963679	0.015669409	-0.711550825	0.67125287
ENSG00000257222	RP11-554E23.4	102063355	102074820	12	antisense	9	0.418742121	0.015661085	-22.22912363	0.655741827
ENSG00000226328	NUP50-AS1	45133020	45163781	22	lincRNA	3	0.418050942	0.015635117	-2.501078424	0.669962881
ENSG00000221819	GAS8-AS1	90028908	90029367	16	antisense	11	0.416816193	0.015588726	2.089160753	0.673271776
ENSG00000254943	RP11-664I21.6	124891304	124892126	11	antisense	21	0.416628034	0.015581657	-22.96724105	0.655209751
ENSG00000244265	SIAH2-AS1	150761937	150762538	3	antisense	6	0.416321932	0.015570156	-10.02278638	0.664540822
ENSG00000254138	RP11-152K4.2	31093977	31267610	5	antisense	1	0.413348513	0.015458442	0.707462895	0.672275773
ENSG00000254675	RP11-7I15.4	78022933	78023721	11	antisense	0	0.413275343	0.015455692	-8.998897442	0.665278897
ENSG00000173867	RP11-97O12.7	88459717	88512529	15	processed_transcript	16	0.412495721	0.015426401	-21.17927473	0.656498615
ENSG00000203808	BVES-AS1	105136308	105169945	6	antisense	10	0.409898627	0.015328826	-15.17162993	0.660829254
ENSG00000249087	ZNF436-AS1	23368997	23371839	1	antisense	11	0.409756645	0.015323491	-5.298018671	0.667946693
ENSG00000255224	CTD-3065J16.9	144078002	144079265	8	antisense	13	0.408889832	0.015290924	-12.59566752	0.662686149
ENSG00000259093	RP11-1112J20.2	63123033	63128214	14	lincRNA	6	0.407624154	0.015243371	-19.04314389	0.658038455
ENSG00000247516	MIR4458HG	8450743	8463095	5	lincRNA	25	0.406799867	0.015212402	-13.11910389	0.662308827
ENSG00000232335	RP11-435D7.3	35739389	35743576	1	antisense	1	0.406584355	0.015204305	-2.089447394	0.670259607
ENSG00000249035	CTB-113P19.1	151676945	151724782	5	antisense	2	0.406188379	0.015189428	2.971040922	0.673907484
ENSG00000229807	XIST	73820651	73852753	X	lincRNA	0	0.404481558	0.015125301	3.847801522	0.674539501
ENSG00000224382	LINC00703	4384246	4410612	10	lincRNA	1	0.40261898	0.015055322	3.035606653	0.673954026
ENSG00000247095	MIR210HG	565660	568457	11	lincRNA	7	0.402417702	0.015047759	-25.54241541	0.653353425
ENSG00000249996	RP11-359P5.1	123036271	123054667	5	antisense	2	0.401676006	0.015019893	5.05053113	0.675406494
ENSG00000253649	PRSS51	10482878	10547585	8	antisense	15	0.400659795	0.014981713	-12.70502672	0.662607317
ENSG00000231970	RP11-452K12.7	97401115	97419524	10	antisense	2	0.400156421	0.014962801	-9.356767078	0.665020925
ENSG00000249776	RP11-133F8.2	92410256	92660863	5	lincRNA	3	0.399000893	0.014919386	-4.498044471	0.668523358
ENSG00000224934	RP11-441O15.3	99431191	99438117	10	lincRNA	11	0.398823768	0.014912731	-8.045650837	0.66596605
ENSG00000229628	AC073115.7	45990905	46000898	7	lincRNA	1	0.396943091	0.014842072	6.957476783	0.676781125
ENSG00000253403	RP11-348M17.2	161687347	161689408	5	antisense	0	0.396724232	0.01483385	-18.97816096	0.658085298
ENSG00000250360	CTD-2089N3.1	50965687	50967008	5	lincRNA	0	0.396410182	0.01482205	1.650465142	0.67295554
ENSG00000235119	RP11-9M16.2	114396724	114398503	9	lincRNA	1	0.396374854	0.014820723	3.41137887	0.674224903
ENSG00000235437	LINC01278	63343227	63561071	X	processed_transcript	6	0.395202197	0.014776665	-7.642831749	0.666256424
ENSG00000230513	THAP7-AS1	21001886	21010342	22	antisense	15	0.394807774	0.014761846	-13.96935819	0.661695917
ENSG00000229124	VIM-AS1	17214239	17229985	10	antisense	5	0.3943253	0.014743719	-14.09902686	0.661602445
ENSG00000250877	RP11-373J21.1	72323028	72330751	4	antisense	1	0.394230646	0.014740163	4.976270294	0.675352963
ENSG00000247228	RP11-296I10.3	70156340	70173448	16	antisense	15	0.392586581	0.014678394	-8.572287255	0.665586421
ENSG00000233776	LINC01251	33732975	33738416	9	antisense	1	0.391418246	0.014634498	-1.172471894	0.670920613
ENSG00000233559	AC016831.7	130853720	130928649	7	lincRNA	4	0.389848714	0.014575529	-11.4167238	0.663535996
ENSG00000231754	RP11-204E9.1	21522476	21523772	6	lincRNA	1	0.38927954	0.014554145	1.739880173	0.673019996
ENSG00000227945	RP11-103C16.2	128027886	128085248	6	antisense	3	0.388938805	0.014541343	-4.083562841	0.668822139
ENSG00000225265	TAF1A-AS1	222589825	222593032	1	antisense	5	0.385319649	0.014405367	-7.590040531	0.666294478
ENSG00000229393	RP3-395M20.3	2493437	2494479	1	antisense	4	0.383067578	0.014320755	-18.83546355	0.658188162
ENSG00000228106	RP11-452F19.3	222815022	222837384	1	lincRNA	22	0.382424919	0.014296609	-13.92851929	0.661725356
ENSG00000247092	SNHG10	95532297	95534872	14	antisense	15	0.381492733	0.014261586	-15.68938028	0.660456031
ENSG00000120055	C10orf95	102449837	102451543	10	lincRNA	2	0.381343496	0.014255979	-17.81473407	0.65892396
ENSG00000225649	AC064875.2	12966784	13007013	2	processed_transcript	2	0.380266159	0.014215502	-7.140553474	0.666618493
ENSG00000230747	AC021188.4	96307263	96321731	2	antisense	2	0.380016652	0.014206128	-2.848379414	0.669712527
ENSG00000253356	RP11-90P5.2	38148741	38163772	8	antisense	20	0.37950387	0.014186862	-13.57311013	0.661981555
ENSG00000214870	AC004540.5	26398593	26494256	7	lincRNA	1	0.379327168	0.014180223	3.565551139	0.674336039
ENSG00000231609	AC009501.4	63043922	63048640	2	antisense	1	0.378964189	0.014166586	4.101653005	0.674722491
ENSG00000242590	RP11-54O7.14	1055033	1056116	1	sense_intronic	7	0.376524965	0.014074942	-11.74834727	0.663296943
ENSG00000224318	CHL1-AS2	195758	197341	3	processed_transcript	10	0.375861388	0.01405001	-12.20977064	0.662964324
ENSG00000251573	CTD-2089N3.2	50969217	50970167	5	lincRNA	0	0.375337681	0.014030334	1.370834408	0.672753967
ENSG00000244701	RP5-894A10.2	141652381	141656810	7	antisense	1	0.375222173	0.014025994	-5.317219555	0.667932852
ENSG00000254204	RP11-400K9.3	53515170	53515905	8	lincRNA	2	0.374919055	0.014014606	2.323696184	0.673440842
ENSG00000237705	AC008937.2	56842016	56862164	5	antisense	6	0.3743103	0.013991734	-15.43917738	0.660636391
ENSG00000235830	SRGAP3-AS4	9256759	9257507	3	lincRNA	2	0.374067192	0.0139826	-5.948504392	0.667477787
ENSG00000258983	RP11-507K2.2	88499334	88515502	14	antisense	6	0.373975242	0.013979146	-4.62958016	0.66842854
ENSG00000237605	RP11-343H5.6	206634649	206635622	1	antisense	1	0.373129836	0.013947383	5.972859528	0.676071359
ENSG00000205041	CTC-425O23.2	40273489	40275479	19	sense_intronic	11	0.372631176	0.013928648	5.75292625	0.675912819
ENSG00000224592	RP5-884C9.2	38047314	38119025	1	lincRNA	3	0.372129568	0.013909802	-3.584366723	0.669181987
ENSG00000196696	PDXDC2P	69976297	70065948	16	processed_transcript	11	0.371859836	0.013899668	15.01898439	0.6825923
ENSG00000225174	OSTM1-AS1	108123515	108159392	6	lincRNA	9	0.37099767	0.013867275	5.692771995	0.675869456
ENSG00000231616	RP11-575L7.4	83831586	83868532	9	antisense	1	0.370091186	0.013833218	4.873953284	0.675279207
ENSG00000258199	RP11-977G19.5	56162359	56190284	12	sense_overlapping	4	0.369907308	0.013826309	-0.592336191	0.671338807
ENSG00000222043	AC079305.10	177264359	177265515	2	antisense	2	0.367916397	0.013751509	-3.895450481	0.668957741
ENSG00000235802	HCFC1-AS1	153969325	153970087	X	antisense	1	0.366818962	0.013710277	-3.333562818	0.66936278
ENSG00000232283	RP11-240L7.4	96246462	96250393	9	antisense	10	0.366107495	0.013683546	-11.4512659	0.663511096
ENSG00000254531	FLJ20021	101347780	101348883	4	lincRNA	14	0.366101522	0.013683322	-14.92459589	0.66100733
ENSG00000234275	AC017053.1	6312954	6325646	2	lincRNA	8	0.365316584	0.013653831	-9.113217276	0.665196489
ENSG00000254910	RP11-326C3.7	310139	311141	11	antisense	2	0.364610812	0.013627314	-5.695430798	0.667660217
ENSG00000224204	PHEX-AS1	22162733	22172983	X	antisense	1	0.363928319	0.013601672	-0.432112564	0.671454304
ENSG00000253690	RP11-380I10.4	28250063	28339255	8	antisense	3	0.363549165	0.013587427	0.139149681	0.671866102
ENSG00000227398	KIF9-AS1	47164497	47246601	3	antisense	6	0.36294415	0.013564696	-4.852529688	0.668267826
ENSG00000246448	RP13-578N3.3	143700257	143865072	4	antisense	1	0.36228815	0.013540049	-1.04605437	0.671011742
ENSG00000247572	CKMT2-AS1	81204084	81301560	5	antisense	10	0.362248546	0.013538561	-13.20480626	0.662247048
ENSG00000253327	RAD21-AS1	116874424	116876868	8	antisense	1	0.360645446	0.013478331	11.35626454	0.679952012
ENSG00000253230	LINC00599	9900064	9905366	8	lincRNA	11	0.358982597	0.013415856	16.28845875	0.683507407
ENSG00000179743	FLJ37453	15834474	15848147	1	antisense	13	0.358846321	0.013410736	-18.81087204	0.658205889
ENSG00000254802	AC022182.3	60965802	60967775	8	lincRNA	0	0.358691031	0.013404902	-6.681221287	0.666949605
ENSG00000243384	RP11-475O23.2	58572744	58574319	3	antisense	1	0.358085195	0.01338214	-12.20807446	0.662965547
ENSG00000254432	RP11-33I11.2	60808735	60809606	8	antisense	4	0.356365813	0.013317541	-3.176236887	0.66947619
ENSG00000256462	RP11-116G8.5	5524976	5525742	10	antisense	3	0.35500914	0.013266569	-3.887771098	0.668963277
ENSG00000225783	MIAT	26646428	26676475	22	lincRNA	11	0.354746356	0.013256696	-6.129208865	0.667347526
ENSG00000233200	RP11-324I22.2	35219894	35230598	10	lincRNA	1	0.35431377	0.013240443	-0.719853319	0.671246885
ENSG00000253653	CTC-248O19.1	157260122	157266625	5	antisense	22	0.354088406	0.013231976	-5.890153403	0.66751985
ENSG00000232415	CTB-51J22.1	74059576	74062284	7	antisense	9	0.353460657	0.013208391	-5.674924446	0.667674999
ENSG00000249602	RP11-98D18.3	151763384	151769501	1	antisense	1	0.353447143	0.013207883	-4.531529754	0.66849922
ENSG00000223356	RP11-66D17.5	156712212	156713174	1	antisense	11	0.352767488	0.013182348	-8.330041891	0.665761045
ENSG00000233080	LINC01399	35119824	35231056	22	lincRNA	16	0.352176877	0.013160158	-15.67006515	0.660469955
ENSG00000236882	LINC01554	95852232	95860133	5	lincRNA	10	0.351546445	0.013136472	-7.651546663	0.666250141
ENSG00000256271	CACNA1C-AS2	2668500	2672220	12	antisense	6	0.351160521	0.013121972	-3.592151679	0.669176375
ENSG00000213888	LINC01521	31346777	31348719	22	lincRNA	22	0.349617146	0.013063986	-7.043983069	0.666688107
ENSG00000239799	ITIH4-AS1	52823935	52825314	3	antisense	11	0.348171117	0.013009657	-12.61608266	0.662671432
ENSG00000245598	DACT3-AS1	46660364	46677447	19	antisense	8	0.347481835	0.01298376	-9.346682671	0.665028195
ENSG00000254690	GS1-393G12.12	144314590	144315138	8	antisense	11	0.347420695	0.012981463	-13.98106502	0.661687478
ENSG00000232597	AC013727.1	103856659	103880209	2	lincRNA	1	0.346610994	0.012951042	2.275647654	0.673406206
ENSG00000232788	AC078883.3	172464262	172466022	2	antisense	9	0.343885571	0.012848645	-3.097783725	0.669532743
ENSG00000255027	RP11-680F20.9	125903247	125938916	11	antisense	3	0.341959282	0.012776272	-2.244925115	0.67014753
ENSG00000235314	LINC00957	44039171	44042306	7	lincRNA	3	0.341655052	0.012764842	-14.17849235	0.661545162
ENSG00000235597	LINC01102	104433267	104520832	2	lincRNA	1	0.339214541	0.012673149	-0.806657998	0.671184312
ENSG00000214999	AC129492.6	8079482	8081565	17	antisense	1	0.337680709	0.012615522	0.397378872	0.672052247
ENSG00000255503	RP11-113K21.4	83072402	83097196	11	lincRNA	1	0.33693485	0.012587499	-7.949711914	0.666035208
ENSG00000232487	RASA3-IT1	114107569	114108820	13	sense_intronic	0	0.33477177	0.01250623	-20.31107127	0.657124464
ENSG00000236107	AC010127.3	165957399	166301784	2	antisense	1	0.332729783	0.01242951	-0.981886034	0.671057998
ENSG00000258757	RP11-841O20.2	52640839	52641566	14	antisense	7	0.33234335	0.012414991	-3.852805263	0.668988482
ENSG00000258378	RP11-517O13.1	58398557	58427125	14	antisense	5	0.331658812	0.012389273	-6.598662515	0.667009118
ENSG00000245975	RP11-30K9.6	58768072	58770974	15	lincRNA	2	0.331332326	0.012377006	-16.43749106	0.659916752
ENSG00000234818	AC092687.5	10589166	10604830	2	antisense	1	0.330959208	0.012362988	9.443231011	0.678572992
ENSG00000257935	LHX5-AS1	113472003	113480624	12	antisense	0	0.330474657	0.012344783	-3.897273885	0.668956427
ENSG00000255091	RP11-495O11.1	45651529	45652691	11	antisense	3	0.32959155	0.012311603	-4.607199132	0.668444674
ENSG00000237838	AC133680.1	24687919	25174305	3	lincRNA	0	0.329482439	0.012307504	-0.897906634	0.671118535
ENSG00000227527	RP11-223A3.1	42335386	42338376	1	sense_overlapping	1	0.328986404	0.012288867	-0.110719305	0.671685982
ENSG00000256982	CTD-2555A7.2	89046172	89052965	16	lincRNA	3	0.328001762	0.012251873	0.274367572	0.671963574
ENSG00000229851	ARSD-AS1	2904904	2906081	X	antisense	9	0.327652458	0.01223875	-5.096212054	0.668092166
ENSG00000253248	RP11-149P24.1	136047021	136166122	8	lincRNA	3	0.324088635	0.012104853	-2.483499673	0.669975552
ENSG00000231530	RP11-187A9.3	42043727	42044247	13	antisense	1	0.322845159	0.012058134	1.663826081	0.672965172
ENSG00000229299	RP4-583P15.10	63744689	63745958	20	antisense	8	0.322369758	0.012040273	-6.620629748	0.666993283
ENSG00000254768	CTD-2140G10.2	22283730	22338245	11	antisense	0	0.322026201	0.012027365	-1.510996518	0.670676586
ENSG00000258048	RP11-530C5.1	79690144	79778451	12	lincRNA	1	0.32195601	0.012024728	-1.065657646	0.670997611
ENSG00000234432	RP11-1275H24.1	5426277	5428927	7	lincRNA	8	0.321612043	0.012011805	-4.755600713	0.668337698
ENSG00000253389	RP11-930P14.1	41660991	41665566	8	antisense	3	0.321367231	0.012002607	-8.279371274	0.665797571
ENSG00000259006	RP11-566K11.4	89919827	89922662	16	antisense	15	0.320850589	0.011983196	-13.00633193	0.662390119
ENSG00000256569	RP11-173P15.5	120721507	120723639	12	antisense	9	0.320342705	0.011964114	-15.42011797	0.66065013
ENSG00000256637	RP11-76I14.1	103874310	104077778	2	lincRNA	0	0.320139233	0.01195647	-21.68844936	0.656131574
ENSG00000206028	CTA-373H7.7	26667693	26672654	22	lincRNA	11	0.320092931	0.01195473	-4.392539966	0.668599412
ENSG00000227258	SMIM2-AS1	44110451	44240517	13	antisense	1	0.319482132	0.011931782	-0.812120431	0.671180374
ENSG00000239775	AC017116.11	44064908	44066079	7	sense_overlapping	4	0.319078846	0.01191663	-11.92596039	0.66316891
ENSG00000253167	KIAA0196-AS1	125040684	125044989	8	antisense	1	0.319076804	0.011916553	-4.651468537	0.668412762
ENSG00000224243	LINC00403	112107119	112108015	13	lincRNA	0	0.316722574	0.011828102	-3.351708799	0.6693497
ENSG00000215866	LINC01356	112820170	112850643	1	lincRNA	5	0.31606664	0.011803458	-11.79161228	0.663265756
ENSG00000170846	AC093323.3	6673451	6676047	4	lincRNA	7	0.315231364	0.011772076	-7.043178737	0.666688686
ENSG00000246263	UBR5-AS1	102239394	102253333	8	antisense	5	0.313721001	0.01171533	-9.638403166	0.664817907
ENSG00000235189	RP4-537K23.4	129869064	129957528	X	antisense	10	0.313640286	0.011712297	-5.239302684	0.667989019
ENSG00000234921	RP11-85O21.5	124031624	124032524	9	antisense	8	0.313275045	0.011698575	-5.554767392	0.667761615
ENSG00000224885	TSSC1-IT1	3298341	3301465	2	sense_intronic	6	0.313124172	0.011692906	-4.246246631	0.668704868
ENSG00000249474	RP11-49I4.3	101823793	101824998	3	antisense	13	0.313086945	0.011691508	-9.73987418	0.664744761
ENSG00000244953	RP11-613D13.8	43943787	43947206	11	lincRNA	7	0.31283451	0.011682023	-4.728105874	0.668357518
ENSG00000248734	CTD-2260A17.1	96784777	96785999	5	antisense	27	0.312761928	0.011679296	-8.231089656	0.665832375
ENSG00000249599	BMPR1B-AS1	94743800	94757533	4	lincRNA	2	0.312342546	0.01166354	-5.98793114	0.667449367
ENSG00000196421	LINC00176	64034344	64039962	20	lincRNA	15	0.311543537	0.01163352	-19.13012753	0.657975752
ENSG00000242396	RP11-67L3.5	54886875	54888001	1	antisense	12	0.311149244	0.011618706	-6.248466232	0.667261559
ENSG00000242588	RP11-274B21.14	128574751	128622694	7	processed_transcript	11	0.311148369	0.011618673	0.569779988	0.672176523
ENSG00000237149	ZNF503-AS2	75401519	75408982	10	antisense	0	0.31096982	0.011611965	0.514172377	0.672136438
ENSG00000254418	RP11-21L19.1	14262846	14273691	11	antisense	21	0.309446713	0.01155474	-7.515634436	0.666348114
ENSG00000245534	RORA-AS1	60479178	60630637	15	antisense	2	0.307571554	0.011484289	-5.562815113	0.667755813
ENSG00000250615	CTC-564N23.2	77073881	77074520	5	antisense	11	0.306957662	0.011461224	-13.70692271	0.661885095
ENSG00000226717	PTPRD-AS2	10613202	10620420	9	lincRNA	9	0.306757361	0.011453699	-8.371619533	0.665731074
ENSG00000174365	SNHG11	38446578	38450921	20	processed_transcript	13	0.306182574	0.011432103	-10.7053203	0.664048814
ENSG00000228404	AP001468.58	46185079	46188941	21	antisense	7	0.305561201	0.011408758	-5.706677099	0.66765211
ENSG00000255372	CTD-3064C13.1	22261209	22262256	11	antisense	3	0.304384254	0.011364538	-2.080509133	0.67026605
ENSG00000232044	LINC01105	5932687	6001275	2	processed_transcript	3	0.302975906	0.011311625	-1.776351171	0.670485304
ENSG00000225555	AP000320.6	34370802	34375348	21	antisense	3	0.302446616	0.011291739	-10.46616953	0.664221207
ENSG00000224387	RP3-395M20.2	2492300	2493258	1	antisense	4	0.301917038	0.011271842	-18.31589232	0.658562698
ENSG00000256690	RP11-727F15.9	62832234	62834043	11	antisense	5	0.300591753	0.01122205	0.073009676	0.671818424
ENSG00000203706	SERTAD4-AS1	210231456	210234047	1	antisense	1	0.300464507	0.011217269	-0.14917209	0.671658263
ENSG00000230550	RP11-74C13.3	204141408	204143009	1	antisense	8	0.299357388	0.011175674	-11.22010258	0.663677731
ENSG00000224384	RP3-417O22.3	96785137	96795821	6	antisense	4	0.29928687	0.011173024	-5.106940653	0.668084433
ENSG00000230606	AC159540.1	97416165	97433527	2	lincRNA	11	0.297436366	0.011103499	0.29584936	0.671979059
ENSG00000214293	APTR	77657660	77696265	7	lincRNA	2	0.29706535	0.011089559	-7.390481639	0.666438331
ENSG00000233396	RP11-458D21.1	146052566	146061948	1	lincRNA	12	0.296849662	0.011081456	-4.371184896	0.668614806
ENSG00000223482	NUTM2A-AS1	87203875	87342612	10	antisense	1	0.295454174	0.011029026	3.993761804	0.674644717
ENSG00000235245	RP11-122K13.12	133295187	133295977	10	antisense	11	0.294889514	0.011007811	5.465249712	0.675705446
ENSG00000237436	RP11-312B8.1	6783892	6784843	1	antisense	18	0.293910042	0.010971011	-7.446021076	0.666398296
ENSG00000253764	RP11-439C15.4	1972570	1974637	8	lincRNA	11	0.29368596	0.010962592	-7.485239059	0.666370025
ENSG00000228971	RP11-286B14.1	95510116	95782342	1	lincRNA	3	0.292839819	0.010930802	-2.74105973	0.669789889
ENSG00000233384	RP11-100E13.1	224611404	224616220	1	bidirectional_promoter_lncrna	18	0.292715419	0.010926128	-3.866781731	0.668978407
ENSG00000242125	SNHG3	28505980	28510892	1	sense_intronic	15	0.292049113	0.010901094	-13.36574397	0.662131035
ENSG00000231607	DLEU2	49982552	50125720	13	antisense	9	0.291552296	0.010882428	-24.759703	0.653917647
ENSG00000256928	RP11-809N8.2	73395559	73396436	11	antisense	2	0.290205424	0.010831825	-12.22318739	0.662954653
ENSG00000228544	CCDC183-AS1	136803927	136808848	9	antisense	11	0.289797616	0.010816503	1.048712639	0.672521764
ENSG00000253361	RP11-675F6.3	38543652	38552680	8	lincRNA	0	0.289147554	0.010792079	-19.01439301	0.65805918
ENSG00000218018	RP4-800J21.3	57384160	57393062	20	antisense	9	0.288470755	0.010766651	-6.558866214	0.667037805
ENSG00000177788	RP5-1061H20.4	229258281	229271028	1	lincRNA	5	0.287968851	0.010747794	-6.215648472	0.667285215
ENSG00000230269	RP1-40E16.9	3182744	3195756	6	lincRNA	1	0.287081351	0.01071445	0.529548803	0.672147523
ENSG00000253715	RP11-706C16.8	142785374	142812120	8	antisense	3	0.286220237	0.010682097	-2.735515827	0.669793885
ENSG00000259118	RP11-840I19.3	65082034	65094212	14	antisense	1	0.285238665	0.010645218	0.870901851	0.672393589
ENSG00000237027	RP11-16C18.3	89560875	89567044	6	antisense	7	0.285238008	0.010645194	-2.402021126	0.670034287
ENSG00000258471	RP11-84C10.4	20995837	20999163	14	antisense	11	0.284905385	0.010632697	11.20427219	0.679842447
ENSG00000240254	B4GALT4-AS1	119226486	119290666	3	antisense	1	0.284535665	0.010618806	4.318736848	0.674878977
ENSG00000253978	CTB-178M22.2	168229583	168232357	5	antisense	25	0.284414836	0.010614266	-12.54350406	0.662723751
ENSG00000235529	AGAP1-IT1	235505751	235507566	2	sense_intronic	1	0.283918686	0.010595625	0.156246451	0.671878426
ENSG00000230260	RP11-75C23.1	197437976	197447469	1	antisense	9	0.282969486	0.010559963	5.273726301	0.675567385
ENSG00000224032	EPB41L4A-AS1	112160526	112164276	5	lincRNA	5	0.282847343	0.010555374	-8.065021653	0.665952086
ENSG00000243836	WDR86-AS1	151409161	151413354	7	processed_transcript	2	0.282727029	0.010550853	0.23533854	0.67193544
ENSG00000227036	LINC00511	72323123	72640472	17	lincRNA	7	0.282685486	0.010549293	-13.44328639	0.662075139
ENSG00000235285	SMIM2-IT1	44146470	44158222	13	sense_intronic	0	0.281831506	0.010517208	-8.833560522	0.665398081
ENSG00000231663	RP5-827C21.4	234372807	234373593	1	antisense	14	0.281738764	0.010513723	-8.17992098	0.66586926
ENSG00000248774	RP11-798M19.3	173322206	173329694	4	antisense	27	0.280115878	0.01045275	-11.17250419	0.663712043
ENSG00000254921	RP11-236J17.6	8035446	8039718	11	antisense	3	0.280113763	0.01045267	-5.153329119	0.668050993
ENSG00000249241	AC195454.1	40316485	40330419	4	lincRNA	6	0.279615026	0.010433932	-7.49921043	0.666359954
ENSG00000233527	ZNF529-AS1	36573070	36594708	19	antisense	7	0.278127668	0.010378051	-4.269010641	0.668688458
ENSG00000228421	AC005013.5	28957667	28959345	7	lincRNA	21	0.277891485	0.010369177	-11.6847858	0.663342762
ENSG00000250159	RP11-381K20.2	137814333	137889336	5	antisense	10	0.277453762	0.010352731	-3.844809782	0.668994246
ENSG00000228802	AC073641.2	223965701	223967706	2	antisense	5	0.277002012	0.010335758	-7.09445752	0.666651722
ENSG00000229502	RP11-52J3.2	157872571	157875210	6	antisense	5	0.275291224	0.010271482	-3.217295373	0.669446592
ENSG00000228839	PIK3IP1-AS1	31292499	31338021	22	antisense	4	0.275072801	0.010263276	-12.22980078	0.662949885
ENSG00000225450	RP3-508I15.14	38739003	38749041	22	antisense	0	0.274881976	0.010256106	-9.238569631	0.665106129
ENSG00000232593	KANTR	53094145	53167014	X	lincRNA	16	0.274752406	0.010251238	-8.104452422	0.665923662
ENSG00000228363	AC015971.2	86562070	86618766	2	antisense	7	0.274668869	0.0102481	-3.150697778	0.6694946
ENSG00000230424	RP1-43E13.2	19210501	19240704	1	antisense	6	0.274540812	0.010243289	-2.895895156	0.669678275
ENSG00000257176	RP11-996F15.2	29280418	29317848	12	antisense	4	0.274518547	0.010242452	-4.480732115	0.668535838
ENSG00000254873	RP11-770J1.5	118397095	118401895	11	antisense	4	0.273867024	0.010217974	3.700266515	0.674433149
ENSG00000234494	SP2-AS1	47897330	47941410	17	antisense	18	0.273237794	0.010194333	-3.714976469	0.669087837
ENSG00000255471	RP11-736K20.5	86892214	86925037	11	antisense	1	0.27271366	0.01017464	1.852097879	0.673100888
ENSG00000228506	RP11-98I9.4	99424922	99431373	6	antisense	6	0.272707312	0.010174402	-2.214909264	0.670169167
ENSG00000175772	LINC01106	110375138	110384442	2	lincRNA	5	0.271540724	0.010130572	-6.498562364	0.667081276
ENSG00000250786	SNHG18	9546200	9550609	5	lincRNA	2	0.271482402	0.010128381	-12.62293987	0.662666489
ENSG00000235106	LINC00094	134025439	134034666	9	antisense	19	0.270875026	0.010105561	-11.11068112	0.663756608
ENSG00000224222	RP11-262I2.2	69994626	70007836	10	lincRNA	1	0.269758922	0.010063628	-9.996254827	0.664559948
ENSG00000254239	GS1-39E22.2	135897637	135900250	5	lincRNA	1	0.269049936	0.01003699	-4.60260581	0.668447985
ENSG00000236677	AP000688.11	36060432	36064408	21	antisense	1	0.266248332	0.009931731	5.03077018	0.675392249
ENSG00000228789	HCG22	31053450	31059890	6	lincRNA	9	0.265160568	0.009890863	-10.9898845	0.663843685
ENSG00000254428	RP11-110I1.11	119003742	119004893	11	antisense	11	0.264661794	0.009872123	5.574846037	0.675784449
ENSG00000228804	RP11-211G3.3	187702313	187733849	3	antisense	5	0.264595565	0.009869635	-4.675023846	0.668395782
ENSG00000229520	LINC00404	112106095	112106882	13	lincRNA	0	0.264494746	0.009865847	-4.618296514	0.668436674
ENSG00000231969	AC144449.1	149587196	149848233	2	antisense	1	0.264413023	0.009862777	-1.155083907	0.670933147
ENSG00000254615	RP11-395G23.3	106270144	106272899	8	lincRNA	0	0.263090182	0.009813076	-8.113794337	0.665916928
ENSG00000215374	FAM66B	7301611	7355354	8	lincRNA	6	0.262159453	0.009778108	-3.345850675	0.669353923
ENSG00000227455	RP11-300M24.1	164827750	164831630	6	lincRNA	2	0.261612298	0.00975755	1.390811285	0.672768368
ENSG00000227540	RP11-152N13.5	73252791	73254349	10	antisense	4	0.260410956	0.009712415	-10.36560655	0.664293699
ENSG00000233806	LINC01237	241881363	242078722	2	processed_transcript	16	0.260025533	0.009697934	-10.24646738	0.664379581
ENSG00000224043	CCNT2-AS1	134735464	134918710	2	antisense	1	0.25926718	0.009669442	2.325305463	0.673442002
ENSG00000255252	RP1-65P5.3	32097143	32105091	11	antisense	9	0.258364207	0.009635516	-1.249918272	0.670864785
ENSG00000204055	RP11-247A12.2	129176771	129210548	9	antisense	8	0.258164409	0.00962801	-7.587569021	0.66629626
ENSG00000231840	AC073342.12	143255264	143287380	7	antisense	10	0.258005222	0.009622029	-0.808440406	0.671183027
ENSG00000227432	AC053503.11	219482073	219516877	2	antisense	4	0.25738509	0.00959873	-8.21083853	0.665846973
ENSG00000226862	RP11-569A11.1	202604268	202605293	1	antisense	4	0.257344537	0.009597206	-4.293875376	0.668670535
ENSG00000226963	AC078883.4	172427774	172428603	2	antisense	9	0.257200815	0.009591806	-1.268827685	0.670851154
ENSG00000204241	RP11-713P17.3	134032272	134046849	11	lincRNA	3	0.257137671	0.009589434	-4.019175685	0.668868553
ENSG00000234055	RP11-247A12.1	129097854	129100266	9	antisense	21	0.257019679	0.009585001	-9.854361239	0.664662232
ENSG00000227400	AC012501.2	153421616	153593288	2	sense_overlapping	1	0.256676521	0.009572108	2.997981152	0.673926904
ENSG00000235078	AC142528.1	3519275	3523197	2	antisense	1	0.256468796	0.009564304	-7.545782833	0.666326382
ENSG00000234405	LL0XNC01-250H12.3	103497523	103500317	X	antisense	1	0.255144518	0.009514549	-4.583522986	0.668461741
ENSG00000244676	AL109761.5	17793488	17810845	21	antisense	0	0.253855018	0.009466101	-9.062509138	0.665233043
ENSG00000250309	CTC-345K18.2	150670658	150672390	5	antisense	1	0.253112218	0.009438193	1.948042963	0.673170051
ENSG00000233006	AC034220.3	132311285	132369916	5	processed_transcript	11	0.252142317	0.009401753	-8.482127184	0.665651414
ENSG00000255571	MIR9-3HG	89361579	89398487	15	lincRNA	15	0.251290353	0.009369744	-8.141070548	0.665897266
ENSG00000224911	AC015936.3	44903161	44904546	17	antisense	3	0.250744499	0.009349236	-5.947879235	0.667478238
ENSG00000223814	RP11-543D5.2	47761132	47765547	1	lincRNA	0	0.250359276	0.009334762	-9.793978471	0.664705759
ENSG00000233695	GAS6-AS1	113815630	113845744	13	antisense	1	0.249626449	0.009307229	-6.660169163	0.666964781
ENSG00000256790	RP11-429A20.3	5018465	5021713	12	lincRNA	1	0.249419929	0.00929947	-5.345104233	0.667912751
ENSG00000231081	RP4-760C5.3	26008791	26010531	20	lincRNA	4	0.24913465	0.009288752	-6.162041665	0.667323858
ENSG00000250790	RP11-46H11.3	132911470	132914732	12	lincRNA	3	0.248422714	0.009262004	-4.204080152	0.668735264
ENSG00000235652	RP11-545I5.3	145799409	145886585	6	antisense	7	0.248320671	0.00925817	-2.567101071	0.669915288
ENSG00000228086	RP5-837M10.4	100462399	100485997	1	antisense	9	0.248246464	0.009255382	2.279378706	0.673408896
ENSG00000259298	RP11-562A8.4	50497195	50498744	15	antisense	10	0.247707616	0.009235137	-8.378323611	0.665726241
ENSG00000259287	RP11-3D4.2	33858602	33864825	15	antisense	6	0.24759905	0.009231058	-4.69584501	0.668380773
ENSG00000242082	RP1-90G24.10	32205115	32269666	22	antisense	12	0.247453627	0.009225594	-3.048443646	0.66956831
ENSG00000255644	RP11-59N23.1	21759980	21766705	12	antisense	2	0.24727064	0.009218719	2.315519526	0.673434948
ENSG00000224870	RP4-758J18.2	1399522	1402046	1	processed_transcript	4	0.24719392	0.009215837	-3.3105344	0.669379381
ENSG00000236886	AC007563.5	216694464	216994079	2	antisense	1	0.2457579	0.009161884	0.856017824	0.672382859
ENSG00000259212	CTD-3065B20.2	90595840	90596447	15	antisense	4	0.245329145	0.009145775	-1.696777511	0.670542665
ENSG00000236618	PITPNA-AS1	1516931	1518096	17	antisense	25	0.245036404	0.009134777	-10.2042301	0.664410028
ENSG00000255201	RP11-350N15.4	38421889	38426096	8	antisense	9	0.244451808	0.009112813	-3.066343547	0.669555407
ENSG00000254641	RP11-732A19.2	6608667	6610135	11	sense_overlapping	2	0.2443653	0.009109562	-2.505936985	0.669959378
ENSG00000223942	RP11-252P19.2	165773201	165775186	6	sense_intronic	1	0.244254747	0.009105409	-4.903902785	0.668230793
ENSG00000255839	RP11-338K17.8	123707602	123708386	12	lincRNA	8	0.24402646	0.009096832	-6.179680364	0.667311143
ENSG00000228812	LAMA5-AS1	62352995	62356480	20	antisense	4	0.242714533	0.009047541	-2.051089165	0.670287258
ENSG00000233611	AC079135.1	236167447	236294927	2	antisense	0	0.24256679	0.00904199	-0.607795651	0.671327663
ENSG00000226562	CYP4F26P	33580695	33605293	9	lincRNA	1	0.242235742	0.009029553	-11.62553174	0.663385476
ENSG00000232324	AC008440.10	53864763	53866140	19	lincRNA	10	0.241957928	0.009019115	-6.420104164	0.667137833
ENSG00000253414	RP11-150O12.6	37516410	37517021	8	sense_intronic	2	0.24090923	0.008979714	-5.126392259	0.668070411
ENSG00000225675	RP4-784A16.5	53328233	53336509	1	lincRNA	3	0.240880833	0.008978647	-2.733283325	0.669795495
ENSG00000196167	COLCA1	111290787	111305045	11	antisense	2	0.240700702	0.00897188	1.385724216	0.672764701
ENSG00000255966	RP5-940J5.3	6532290	6533498	12	antisense	6	0.24012314	0.00895018	-3.487405017	0.669251883
ENSG00000258515	RP11-203M5.7	20451305	20451918	14	antisense	11	0.238747126	0.008898482	13.45589732	0.681465542
ENSG00000234630	LL22NC03-2H8.4	22293733	22294794	22	lincRNA	15	0.238419299	0.008886165	-7.934474296	0.666046192
ENSG00000253559	OSGEPL1-AS1	189762704	189765556	2	antisense	1	0.23822969	0.008879041	1.032061589	0.672509761
ENSG00000254510	RP11-867G23.10	66409158	66417137	11	processed_transcript	3	0.237996561	0.008870282	-0.043392637	0.671734515
ENSG00000244491	RP3-508I15.18	38734725	38738765	22	antisense	0	0.237760976	0.008861431	-6.20360956	0.667293894
ENSG00000236528	RP1-125I3.2	25859613	25863420	1	antisense	21	0.237747098	0.00886091	-7.05803237	0.666677979
ENSG00000236263	RP11-263K19.6	155211151	155213819	1	antisense	3	0.237425467	0.008848826	-2.264790254	0.67013321
ENSG00000257831	RP11-596D21.1	31248628	31302739	14	antisense	9	0.237061248	0.008835141	2.038842598	0.673235504
ENSG00000234327	AC012146.7	5111468	5115004	17	processed_transcript	4	0.236691278	0.008821241	-15.56239369	0.66054757
ENSG00000228400	AC079154.1	124016858	124025173	2	antisense	7	0.236668529	0.008820387	-1.867027551	0.670419939
ENSG00000223960	AC009948.5	178413939	178440243	2	antisense	4	0.2358743	0.008790547	-0.680631517	0.671275158
ENSG00000235576	AC092580.4	7725801	7730705	2	lincRNA	0	0.2349355	0.008755275	-9.105467948	0.665202075
ENSG00000230498	RP4-564M11.2	77067920	77078482	1	antisense	1	0.233866275	0.008715103	-2.755478282	0.669779495
ENSG00000227492	RP11-316M21.6	100229667	100234000	10	antisense	5	0.233574296	0.008704133	-7.487066384	0.666368708
ENSG00000254740	RP11-334E6.3	119372706	119381613	11	antisense	1	0.233412607	0.008698058	0.553072863	0.67216448
ENSG00000251556	RP11-118M9.3	146099406	146120412	5	antisense	4	0.233090928	0.008685972	1.68519281	0.672980574
ENSG00000248839	RP11-227H4.5	98522570	98525334	3	antisense	5	0.233065929	0.008685033	11.75958583	0.680242748
ENSG00000233271	RP11-12C17.2	54980950	54992274	1	antisense	1	0.232774272	0.008674075	-9.996096366	0.664560062
ENSG00000229152	ANKRD10-IT1	110894639	110899172	13	sense_intronic	11	0.232041554	0.008646546	-0.361144558	0.671505462
ENSG00000254973	RP11-429J17.7	143758153	143771822	8	lincRNA	3	0.231036775	0.008608796	-1.076471735	0.670989815
ENSG00000256742	RP13-941N14.1	121580792	121593504	12	lincRNA	1	0.229570579	0.008553709	-3.434956674	0.66928969
ENSG00000236502	SIX3-AS1	44940154	44941873	2	lincRNA	0	0.22892376	0.008529407	-0.221912796	0.671605828
ENSG00000230289	RP11-334J6.6	131516558	131522229	9	antisense	15	0.228507192	0.008513756	-9.075456807	0.665223709
ENSG00000232710	RP4-669P10.16	42136433	42139927	22	lincRNA	6	0.227228172	0.008465702	-5.345590284	0.667912401
ENSG00000245694	CRNDE	54918863	54929189	16	lincRNA	1	0.225575267	0.008403601	-3.275830017	0.669404397
ENSG00000253809	RP1-149L1.1	70222758	70242156	6	antisense	9	0.225088343	0.008385307	2.572848349	0.673620445
ENSG00000233975	RP11-288L9.1	27660328	27662722	1	lincRNA	2	0.224953016	0.008380222	0.461227186	0.672098273
ENSG00000258636	CTD-2298J14.2	41587861	41604856	14	lincRNA	7	0.224914858	0.008378789	-1.415681406	0.670745294
ENSG00000229931	RP1-151F17.1	16761138	16762652	6	antisense	22	0.224621867	0.008367781	-3.630373332	0.669148823
ENSG00000254744	CTD-3076O17.1	99970215	99974010	15	antisense	21	0.223956399	0.008342778	-9.706731209	0.664768652
ENSG00000232656	IDI2-AS1	1022666	1044201	10	antisense	16	0.223647104	0.008331158	-9.851542414	0.664664264
ENSG00000258859	RP11-594C13.1	87353070	87573022	14	lincRNA	3	0.222283215	0.008279915	-2.451553985	0.669998581
ENSG00000256603	RP11-667M19.2	113770393	113771691	11	antisense	5	0.22222847	0.008277858	-4.416585095	0.668582079
ENSG00000232828	AF196970.3	48698963	48737163	X	antisense	6	0.221140784	0.008236993	-13.72652122	0.661870967
ENSG00000258876	RP11-270M14.5	75970924	75971587	14	lincRNA	2	0.220164086	0.008200297	0.171124739	0.671889151
ENSG00000254821	RP3-400B16.4	4135423	4146053	6	antisense	9	0.219962381	0.008192719	0.148154427	0.671872593
ENSG00000235910	APOA1-AS	116836117	116855729	11	antisense	4	0.219708789	0.008183191	-12.72129791	0.662595587
[truncated: 421 more rows]
